# Supplementary material for: Study on the Antibreast Cancer Mechanism and Bioactive Components of Si-Wu-Tang by Cell Type-Specific Molecular Network
Source: Evid Based Complement Alternat Med. 2020 Mar 12;2020:2345970. doi: 10.1155/2020/2345970 (PMC7091537; doi:10.1155/2020/2345970)
Supplement: Supplementary Materials — Supplemental Information 1: 656 components of SWT. Supplemental Information 2: the proteins which could interact with the components of SWT. Supplemental Information 3: 60 breast cancer-related targets. [file 2345970.f1.xlsx]

## Sheet: Supplemental Information 1
Herb	Compound Name	CAS ID	Pubchem ID	SMILES
Rehmanniae Radix Praeparata	Rehmannioside B	81720-06-1	6325882	C1=COC(C2C1C(C3C2(O3)CO)OC4C(C(C(C(O4)CO)O)O)O)OC5C(C(C(C(O5)CO)O)O)O
Rehmanniae Radix Praeparata	Rehmannioside C	81720-07-2	6325883	CC1(CC(C2C1C(OC=C2)OC3C(C(C(C(O3)CO)O)O)O)OC4C(C(C(C(O4)CO)O)O)O)O
Rehmanniae Radix Praeparata	succinic acid	110-15-6	Not Available	C(CC(=O)O)C(=O)O
Rehmanniae Radix Praeparata	5-Hydroxymethyl-2-furancarboxylic acid	6338-41-6	80642	C1=C(OC(=C1)C(=O)O)CO
Rehmanniae Radix Praeparata	5-HMF	67-47-0	Not Available	C1=C(OC(=C1)C=O)CO
Rehmanniae Radix Praeparata	jiofuran	10142531	5318702	C1=C2C(C(C(C2=CO1)O)O)CCO
Rehmanniae Radix Praeparata	Phenylalanine	673-31-4	Not Available	C1=CC=C(C=C1)CC(C(=O)O)N
Rehmanniae Radix Praeparata	uridine	58-96-8	Not Available	C1=CN(C(=O)NC1=O)C2C(C(C(O2)CO)O)O
Rehmanniae Radix Praeparata	uracil	66-22-8	Not Available	C1=CNC(=O)NC1=O
Rehmanniae Radix Praeparata	Melittoside	Not Available	11968737	C1=COC(C2C1(C(C=C2CO)O)OC3C(C(C(C(O3)CO)O)O)O)OC4C(C(C(C(O4)CO)O)O)O
Rehmanniae Radix Praeparata	Rehmannioside D	81720-08-3	86287411	C1=COC(C2C1(C(C=C2CO)O)OC3C(C(C(C(O3)CO)O)O)OC4C(C(C(C(O4)CO)O)O)O)OC5C(C(C(C(O5)CO)O)O)O
Rehmanniae Radix Praeparata	aucubin	479-98-1	Not Available	C1=COC(C2C1C(C=C2CO)O)OC3C(C(C(C(O3)CO)O)O)O
Rehmanniae Radix Praeparata	catalpol	2415-24-9	Not Available	C1=COC(C2C1C(C3C2(O3)CO)O)OC4C(C(C(C(O4)CO)O)O)O
Rehmanniae Radix Praeparata	Rehmannioside A	81720-05-0	86287413	C1=COC(C2C1C(C3C2(O3)CO)O)OC4C(C(C(C(O4)COC5C(C(C(C(O5)CO)O)O)O)O)O)O
Rehmanniae Radix Praeparata	Danmelittoside	20633-72-1	Not Available	C1C=C(C2C1C=COC2OC3C(C(C(C(O3)(CO)O)(O)O)O)O)CO
Rehmanniae Radix Praeparata	Rehmaglutin C	Not Available	5320905	C1C2C(C=C(C2(OC1=O)CO)CO)O
Rehmanniae Radix Praeparata	Glutinoside	Not Available	24884124	C1C2CC(C3C1C(C(C3(OO2)O)Cl)O)OC4C(C(C(C(O4)CO)O)O)O
Rehmanniae Radix Praeparata	5-oxoproline	98-79-3	7405	C1CC(=O)NC1C(=O)O
Rehmanniae Radix Praeparata	5-oxoproline	98-79-3	Not Available	C1CC(=O)NC1C(=O)O
Rehmanniae Radix Praeparata	Dihydrocatalpol	Not Available	5705531	C1COC(C2C1C(C3C2(O3)CO)O)OC4C(C(C(C(O4)CO)O)O)O
Rehmanniae Radix Praeparata	Rehmaglutin A	103744-82-7	5320903	C1COC2C3C1C(C(C3(CO2)O)O)O
Rehmanniae Radix Praeparata	aegineticacid	53537-92-1	Not Available	CC(=CC(=O)O)C=CC1(C(CCCC1(C)O)(C)C)O
Rehmanniae Radix Praeparata	Ajugoside	52916-96-8	Not Available	CC(=O)OC1(CCC2C1C(OC=C2)OC3C(C(C(C(O3)(CO)O)O)O)O)C
Rehmanniae Radix Praeparata	jioglutolide	Not Available	5318708	CC1(CC(C2C1COC(=O)C2)O)O
Rehmanniae Radix Praeparata	Ajugol	52949-83-4	Not Available	CC1(CCC2C1C(OC=C2)OC3C(C(C(C(O3)(CO)O)O)O)O)O
Rehmanniae Radix Praeparata	Rehmapicroside	Not Available	5320914	CC1=C(C(CCC1OC2C(C(C(C(O2)CO)O)O)O)(C)C)C(=O)O
Rehmanniae Radix Praeparata	isoacteoside	61303-13-7	Not Available	CC1C(C(C(C(O1)OC2C(C(OC(C2O)OCCC3=CC(=C(C=C3)O)O)COC(=O)C=CC4=CC(=C(C=C4)O)O)O)O)O)O
Rehmanniae Radix Praeparata	Cistanoside F	Not Available	44429870	CC1C(C(C(C(O1)OC2C(C(OC(C2OC(=O)C=CC3=CC(=C(C=C3)O)O)CO)O)O)O)O)O		MOL003696
Rehmanniae Radix Praeparata	Acteoside	61276-17-3	Not Available	CC1C(C(C(C(O1)OC2C(C(OC(C2OC(=O)C=CC3=CC(=C(C=C3)O)O)CO)OCCC4=CC(=C(C=C4)O)O)O)O)O)O
Rehmanniae Radix Praeparata	Jionoside D	Not Available	9895632	CC1C(C(C(C(O1)OC2C(C(OC(C2OC(=O)C=CC3=CC(=C(C=C3)O)O)CO)OCCC4=CC(=C(C=C4)OC)O)O)O)O)O
Rehmanniae Radix Praeparata	Echinacoside	82854-37-3	Not Available	CC1C(C(C(C(O1)OC2C(C(OC(C2OC(=O)C=CC3=CC(=C(C=C3)O)O)COC4C(C(C(C(O4)CO)O)O)O)OCCC5=CC(=C(C=C5)O)O)O)O)O)O
Rehmanniae Radix Praeparata	Echinacoside	82854-37-3	5281771	CC1C(C(C(C(O1)OC2C(C(OC(C2OC(=O)C=CC3=CC(=C(C=C3)O)O)COC4C(C(C(C(O4)CO)O)O)O)OCCC5=CC(=C(C=C5)O)O)O)O)O)O
Rehmanniae Radix Praeparata	Leucosceptoside A	Not Available	10394343	CC1C(C(C(C(O1)OC2C(C(OC(C2OC(=O)C=CC3=CC(=C(C=C3)O)OC)CO)OCCC4=CC(=C(C=C4)O)O)O)O)O)O
Rehmanniae Radix Praeparata	Martynoside	Not Available	44429856	CC1C(C(C(C(O1)OC2C(C(OC(C2OC(=O)C=CC3=CC(=C(C=C3)O)OC)CO)OCCC4=CC(=C(C=C4)OC)O)O)O)O)O
Rehmanniae Radix Praeparata	Jionoside A1	Not Available	6325450	CC1C(C(C(C(O1)OC2C(C(OC(C2OC(=O)C=CC3=CC(=C(C=C3)O)OC)COC4C(C(C(C(O4)CO)O)O)O)OCCC5=CC(=C(C=C5)O)O)O)O)O)O
Rehmanniae Radix Praeparata	Jionoside B1	Not Available	5281782	CC1C(C(C(C(O1)OC2C(C(OC(C2OC(=O)C=CC3=CC(=C(C=C3)O)OC)COC4C(C(C(C(O4)CO)O)O)O)OCCC5=CC(=C(C=C5)OC)O)O)O)O)O		MOL003715
Rehmanniae Radix Praeparata	Jioglutoside A	Not Available	11968647	CC1C(C(C(C(O1)OC2C3C(C=CO2)C(C4C3(O4)CO)O)O)O)O
Rehmanniae Radix Praeparata	Jioglutoside B	Not Available	11968648	CC1C(C(C(C(O1)OCC2C(C(C(C(O2)OC3C4C(CCC4=C)C(=CO3)C(=O)OC)O)O)O)O)O)O
Rehmanniae Radix Praeparata	forsythoside A	79916-77-1	Not Available	CC1C(C(C(C(O1)OCC2C(C(C(C(O2)OCCC3=CC(=C(C=C3)O)O)O)O)OC(=O)C=CC4=CC(=C(C=C4)O)O)O)O)O
Rehmanniae Radix Praeparata	8-epiloganic acid	82509-41-9	Not Available	CC1C(CC2C1C(OC=C2C(=O)O)OC3C(C(C(C(O3)CO)O)O)O)O
Rehmanniae Radix Praeparata	linoleic acid	60-33-3	Not Available	CCCCCC=CCC=CCCCCCCCC(=O)O
Rehmanniae Radix Praeparata	palmitoleic acid	373-49-9	Not Available	CCCCCCC=CCCCCCCCC(=O)O
Rehmanniae Radix Praeparata	myristic acid	544-63-8	Not Available	CCCCCCCCCCCCCC(=O)O
Rehmanniae Radix Praeparata	pentadecanoic acid	1002-84-2	Not Available	CCCCCCCCCCCCCCC(=O)O
Rehmanniae Radix Praeparata	palmitic acid	1957-10-3	Not Available	CCCCCCCCCCCCCCCC(=O)O
Rehmanniae Radix Praeparata	margaric acid	506-12-7	Not Available	CCCCCCCCCCCCCCCCC(=O)O
Rehmanniae Radix Praeparata	stearic acid	57-11-4	Not Available	CCCCCCCCCCCCCCCCCC(=O)O
Rehmanniae Radix Praeparata	nonadecanOic acid	646-30-0	Not Available	CCCCCCCCCCCCCCCCCCC(=O)O
Rehmanniae Radix Praeparata	arachidic acid	506-30-9	Not Available	CCCCCCCCCCCCCCCCCCCC(=O)O
Rehmanniae Radix Praeparata	heneicosanoic acid	2363-71-5	Not Available	CCCCCCCCCCCCCCCCCCCCC(=O)O
Rehmanniae Radix Praeparata	behenic acid	112-85-6	Not Available	CCCCCCCCCCCCCCCCCCCCCC(=O)O
Rehmanniae Radix Praeparata	Geniposide	24512-62-7	Not Available	COC(=O)C1=COC(C2C1CC=C2CO)OC3C(C(C(C(O3)CO)O)O)O
Rehmanniae Radix Praeparata	jioglutin A	Not Available	5318703	COC1CC2C3C(O1)OCC3(C(C2O)Cl)O
Rehmanniae Radix Praeparata	jioglutin C	Not Available	5318705	COC1CC2C3C(O1)OCC3(C(C2O)O)O
Rehmanniae Radix Praeparata	DL-Methionine	59-51-8	Not Available	CSCCC(C(=O)O)N
Rehmanniae Radix Praeparata	Cistanoside A	93236-42-1	Not Available	O=C(/C([H])=C([H])/C1=C([H])C([H])=C(O[H])C(O[H])=C1[H])OC2([H])C(C([H])([H])OC(OC(C([H])([H])O[H])([H])C3([H])O[H])([H])C(O[H])([H])C3([H])OC4([H])C(O[H])([H])C(O[H])([H])C(O[H])([H])C(C([H])([H])[H])([H])O4)([H])OC(OC([H])([H])C([H])([H])C5=C([H])C([H])=C(O[H])C(OC([H])([H])[H])=C5[H])([H])C(O[H])([H])C2([H])O[H]
Rehmanniae Radix Praeparata	Rehmaglutin D	103744-84-9	Not Available	OC1C2CCOC(OC3)C2C3(O)C1Cl
Rehmanniae Radix Praeparata	Rehmaglutin B	103744-83-8	Not Available	OC1OC2C3C(C(O)C(Cl)C3(O)CO2)C1
Rehmanniae Radix Praeparata	3-hydroxy-2,6,6-trimethyl-1cyclohexene-1-carboxylic acid	Not Available	Not Available	Not Available
Rehmanniae Radix Praeparata	decaffeoyl-verbascoside	Not Available	Not Available	Not Available
Rehmanniae Radix Praeparata	5-(α-D-glucopyranosy-(1-6)-α-D-glucopyranosyloxymethyl)-2-furancarboxaldehyde	Not Available	Not Available	Not Available
Rehmanniae Radix Praeparata	5-(α-D-glucopyranosyloxymethyl)-furancarboxaldehyde	Not Available	Not Available	Not Available
Rehmanniae Radix Praeparata	jioglutin B	Not Available	Not Available	Not Available
Rehmanniae Radix Praeparata	rehmapicrogenin	Not Available	Not Available	Not Available
Rehmanniae Radix Praeparata	trihydroxy-β-lonone	Not Available	Not Available	Not Available
Rehmanniae Radix Praeparata	dihydroxy-p-lonone	Not Available	Not Available	Not Available
Rehmanniae Radix Praeparata	gross polysaccharide of Radix Rehmanniae	Not Available	Not Available	Not Available
Rehmanniae Radix Praeparata	A-GALACTOSYLCERAMIDE	Not Available	Not Available	Not Available
Rehmanniae Radix Praeparata	Jionoside A2	Not Available	Not Available	Not Available
Rehmanniae Radix Praeparata	Jionoside B2	Not Available	Not Available	Not Available
Rehmanniae Radix Praeparata	Leucosceptoside	Not Available	Not Available	Not Available
Rehmanniae Radix Praeparata	Martynoside isomer	Not Available	Not Available	Not Available
Rehmanniae Radix Praeparata	sec-Hydroxyaeginetic acid	Not Available	Not Available	Not Available
Rehmanniae Radix Praeparata	Rehmapicrogenin	Not Available	Not Available	Not Available
Rehmanniae Radix Praeparata	D-mannitol	133-43-7	6251	C(C(C(C(C(CO)O)O)O)O)O
Rehmanniae Radix Praeparata	Lauric acid	8045-27-0	3893	CCCCCCCCCCCC(=O)O
Rehmanniae Radix Praeparata	Daucosterol	474-58-8	5742590	CCC(CCC(C)C1CCC2C1(CCC3C2CC=C4C3(CCC(C4)OC5C(C(C(C(O5)CO)O)O)O)C)C)C(C)C
Rehmanniae Radix Praeparata	sitosterol(3R,8S,9S,10R,13R,14S,17R)-17-[(2R,5R)-5-ethyl-6-methylheptan-2-yl]-10,13-dimethyl-2,3,4,7,8,9,11,12,14,15,16,17-dodecahydro-1H-cyclopenta[a]phenanthren-3-ol)	83-46-5	12303645	CCC(CCC(C)C1CCC2C1(CCC3C2CC=C4C3(CCC(C4)O)C)C)C(C)C
Rehmanniae Radix Praeparata	Ferulic acid	537-98-4	445858	COC1=C(C=CC(=C1)C=CC(=O)O)O
Rehmanniae Radix Praeparata	Cis-Caffeic acid/Caffeicacid	331-39-5	1549111	C1=CC(=C(C=C1C=CC(=O)O)O)O
Rehmanniae Radix Praeparata	Stigmasterol	83-48-7	5280794	CCC(C=CC(C)C1CCC2C1(CCC3C2CC=C4C3(CCC(C4)O)C)C)C(C)C
Rehmanniae Radix Praeparata	sucrose	25702-74-3	5988	C(C1C(C(C(C(O1)OC2(C(C(C(O2)CO)O)O)CO)O)O)O)O
Rehmanniae Radix Praeparata	leonuride	50906-66-6	46227138	CC1(CC(C2C1C(OC=C2)OC3C(C(C(C(O3)CO)O)O)O)O)O
Rehmanniae Radix Praeparata	Methyl (2E,4E)-hexadeca-2,4-dienoate	29961-54-4	6443015	CCCCCCCCCCCC=CC=CC(=O)OC
Rehmanniae Radix Praeparata	Dihydro-beta-ionone	17283-81-7	519382	CC1=C(C(CCC1)(C)C)CCC(=O)C
Rehmanniae Radix Praeparata	Forsythiaside	79916-77-1	5281773	CC1C(C(C(C(O1)OCC2C(C(C(C(O2)OCCC3=CC(=C(C=C3)O)O)O)O)OC(=O)C=CC4=CC(=C(C=C4)O)O)O)O)O
Rehmanniae Radix Praeparata	2-(4-hydroxyphenyl)ethyl hexacosanoate	Not Available	481679	CCCCCCCCCCCCCCCCCCCCCCCCCC(=O)OCCC1=CC=C(C=C1)O
Rehmanniae Radix Praeparata	methyl 9,10-methylene-hexadecanoate	Not Available	12159685	CCCCCCC1CC1CCCCCCCC(=O)OC
Rehmanniae Radix Praeparata	(2S,3R,4R,5S,6R)-2-[[(1S,4aS,5R,7aR)-4a,5-dihydroxy-7-(hydroxymethyl)-5,7a-dihydro-1H-cyclopenta[c]pyran-1-yl]oxy]-6-(hydroxymethyl)oxane-3,4,5-triol	Not Available	21550273	C1=COC(C2C1(C(C=C2CO)O)O)OC3C(C(C(C(O3)CO)O)O)O
Rehmanniae Radix Praeparata	Geniposide	24512-63-8	107848	COC(=O)C1=COC(C2C1CC=C2CO)OC3C(C(C(C(O3)CO)O)O)O
Rehmanniae Radix Praeparata	methyl (1S,4aS,7aS)-7-methylene-1-[(2S,3R,4S,5S,6R)-3,4,5-trihydroxy-6-[[(2R,3R,4R,5S,6R)-3,4,5-trihydroxy-6-methyl-tetrahydropyran-2-yl]oxymethyl]tetrahydropyran-2-yl]oxy-4a,5,6,7a-tetrahydro-1H-cyclopenta[d]pyran-4-carboxylate	Not Available	21550422	CC1C(C(C(C(O1)OCC2C(C(C(C(O2)OC3C4C(CCC4=C)C(=CO3)C(=O)OC)O)O)O)O)O)O
Rehmanniae Radix Praeparata	METHYL PALMITOLEATE	1120-25-8	643801	CCCCCCC=CCCCCCCCC(=O)OC
Rehmanniae Radix Praeparata	Purpureaside C	82854-37-3	11953944	CC1C(C(C(C(O1)OC2C(C(OC(C2OC(=O)C=CC3=CC(=C(C=C3)O)O)COC4C(C(C(C(O4)CO)O)O)O)OCCC5=CC(=C(C=C5)O)O)O)O)O)O
Rehmanniae Radix Praeparata	Rehmaglutin B	103744-83-8	5320904	C1C2C3C(OCC3(C(C2O)Cl)O)OC1O
Rehmanniae Radix Praeparata	(Rehmaionoside A）/(2S,3R,4S,5S,6R)-2-[(1R,2R)-2-hydroxy-2-[(E,3S)-3-hydroxybut-1-enyl]-1,3,3-trimethylcyclohexoxy]-6-(hydroxymethyl)tetrahydropyran-3,4,5-triol	Not Available	10023290	CC(C=CC1(C(CCCC1(C)OC2C(C(C(C(O2)CO)O)O)O)(C)C)O)O
Rehmanniae Radix Praeparata	(Rehmaionoside B)/(2S,3R,4S,5S,6R)-2-[(1R,2R)-2-hydroxy-2-[(E,3R)-3-hydroxybut-1-enyl]-1,3,3-trimethylcyclohexoxy]-6-(hydroxymethyl)tetrahydropyran-3,4,5-triol	Not Available	10430488	CC(C=CC1(C(CCCC1(C)OC2C(C(C(C(O2)CO)O)O)O)(C)C)O)O
Rehmanniae Radix Praeparata	Rehmaionoside C/(E)-4-[(1R,6R)-1-hydroxy-2,2,6-trimethyl-6-[(2S,3R,4S,5S,6R)-3,4,5-trihydroxy-6-(hydroxymethyl)oxan-2-yl]oxycyclohexyl]but-3-en-2-one	Not Available	11740990	CC(=O)C=CC1(C(CCCC1(C)OC2C(C(C(C(O2)CO)O)O)O)(C)C)O
Rehmanniae Radix Praeparata	Rehmannioside A/(3R)-2,6,6-trimethyl-3-[(2R,3R,4S,5S,6R)-3,4,5-trihydroxy-6-(hydroxymethyl)oxan-2-yl]oxycyclohexene-1-carboxylic acid	Not Available	6325881	CC1=C(C(CCC1OC2C(C(C(C(O2)CO)O)O)O)(C)C)C(=O)O
Angelicae Sinensis Radix	Phenylalanine	673-31-4	Not Available	C1=CC=C(C=C1)CCCOC(=O)N
Angelicae Sinensis Radix	Linoleic acid	60-33-3	Not Available	CCCCCC=CCC=CCCCCCCCC(=O)O
Angelicae Sinensis Radix	Stearic acid	57-11-4	Not Available	CCCCCCCCCCCCCCCCCC(=O)O
Angelicae Sinensis Radix	Galactose	381716-33-2	Not Available	C(C1C(C(C(C(O1)O)O)O)O)O
Angelicae Sinensis Radix	Pentadecanoic acid	1002-84-2	Not Available	CCCCCCCCCCCCCCC(=O)O
Angelicae Sinensis Radix	Sitosterol	5779-62-4	Not Available	CCC(CCC(C)C1CCC2C1(CCC3C2CC=C4C3(CCC(C4)O)C)C)C(C)C
Angelicae Sinensis Radix	Stigma- sterol-D-glucoside	Not Available	70699355	CCC(C=CC(C)C1CCC2C1(CCC3C2CC=C4C3(CCC(C4)OC5C(C(C(C(O5)CO)O)O)O)C)C)C(C)C
Angelicae Sinensis Radix	Vitamin E	59-02-9	Not Available	CC1=C(C(=C2CCC(OC2=C1C)(C)CCCC(C)CCCC(C)CCCC(C)C)C)O
Angelicae Sinensis Radix	beta-pinene	127-91-3	Not Available	CC1(C2CCC(=C)C1C2)C
Angelicae Sinensis Radix	alpha-pinene	80-56-8	6654	CC1=CCC2CC1C2(C)C
Angelicae Sinensis Radix	p-Cymene	99-87-6	Not Available	CC1=CC=C(C=C1)C(C)C
Angelicae Sinensis Radix	β-Phellandrene	99-83-2	Not Available	CC(C)C1CCC(=C)C=C1
Angelicae Sinensis Radix	Myrcene	123-35-3	Not Available	CC(=CCCC(=C)C=C)C
Angelicae Sinensis Radix	Acetophenone	98-86-2	Not Available	CC(=O)C1=CC=CC=C1
Angelicae Sinensis Radix	Chamigrene	16982-00-6	Not Available	CC1=CCC2(CC1)C(=C)CCCC2(C)C
Angelicae Sinensis Radix	n-Butyl-phthalide	Not Available	3026	CCCCOC(=O)C1=CC=CC=C1C(=O)OCCCC
Angelicae Sinensis Radix	bergaptene	484-20-8	Not Available	COC1=C2C=CC(=O)OC2=CC3=C1C=CO3
Angelicae Sinensis Radix	4-Methylbenzyl alcohol	589-18-4	Not Available	CC1=CC=C(C=C1)CO
Angelicae Sinensis Radix	Phthalic acid	88-99-3	Not Available	C1=CC=C(C(=C1)C(=O)O)C(=O)O
Angelicae Sinensis Radix	Glabralactone	37719-98-5	Not Available	CC(=CC(=O)C1=C(C=C(C2=C1OC(=O)C=C2)OC)OC)C
Angelicae Sinensis Radix	guaiacol	90-05-1	460	COC1=CC=CC=C1O
Angelicae Sinensis Radix	2',4'-Dihydroxyacetophenone	89-84-9	Not Available	CC(=O)C1=C(C=C(C=C1)O)O
Angelicae Sinensis Radix	β-ocimene	13877-91-3	Not Available	CC(=CCC=C(C)C=C)C
Angelicae Sinensis Radix	Styrene	100-42-5	Not Available	C=CC1=CC=CC=C1
Angelicae Sinensis Radix	(E)-β-farnesene	18794-84-8	Not Available	CC(=CCC/C(=C/CCC(=C)C=C)/C)C
Angelicae Sinensis Radix	γ-elemene	Not Available	6432312	CC(=C1CCC(C(C1)C(=C)C)(C)C=C)C
Angelicae Sinensis Radix	α-copaene	Not Available	25245021	CC1=CCC2C3C1C2(CCC3C(C)C)C
Angelicae Sinensis Radix	cyclohexane	110-82-7	Not Available	C1CCCCC1
Angelicae Sinensis Radix	Adenine	73-24-5	Not Available	C1=NC2=C(N1)C(=NC=N2)N
Angelicae Sinensis Radix	vanillic acid	121-34-6	Not Available	COC1=C(C=CC(=C1)C(=O)O)O
Angelicae Sinensis Radix	Methionine	63-68-3	Not Available	CSCCC(C(=O)O)N
Angelicae Sinensis Radix	caryophyllene oxide	1139-30-6	Not Available	CC1(CC2C1CCC3(C(O3)CCC2=C)C)C
Angelicae Sinensis Radix	Eugenol	97-53-0	Not Available	COC1=C(C=CC(=C1)CC=C)O
Angelicae Sinensis Radix	4-Ethenyl-2-methoxyphenol	7786-61-0	Not Available	COC1=C(C=CC(=C1)C=C)O
Angelicae Sinensis Radix	n-tetradecane	629-59-4	Not Available	CCCCCCCCCCCCCC
Angelicae Sinensis Radix	n-Nonane	203-913-4	Not Available	CCCCCCCCC
Angelicae Sinensis Radix	Undecane	1120-21-4	Not Available	CCCCCCCCCCC
Angelicae Sinensis Radix	senkyunolide G	94530-85-5	Not Available	CCCCC1(C2=C(C=CCC2)C(=O)O1)O
Angelicae Sinensis Radix	senkyunolide H	94596-27-7	Not Available	CCCC=C1C2=C(C(C(CC2)O)O)C(=O)O1
Angelicae Sinensis Radix	senkyunolide I	94596-28-8	Not Available	CCCC=C1C2=C(C(C(CC2)O)O)C(=O)O1
Angelicae Sinensis Radix	5-acetoxymethyl-furaldehyde	10551-58-3	Not Available	CC(=O)OCC1=CC=C(O1)C=O
Angelicae Sinensis Radix	5-hydromethylfuraldehyde	67-47-0	Not Available	C1=C(OC(=C1)C=O)CO
Angelicae Sinensis Radix	ferulaldehyde	Not Available	5280536	COC1=C(C=CC(=C1)C=CC=O)O
Angelicae Sinensis Radix	heptane	142-82-5	Not Available	CCCCCCC
Angelicae Sinensis Radix	n-octane	111-65-9	Not Available	CCCCCCCC
Angelicae Sinensis Radix	decane	124-18-5	Not Available	CCCCCCCCCC
Angelicae Sinensis Radix	Dodecane	112-40-3	Not Available	CCCCCCCCCCCC
Angelicae Sinensis Radix	n-Tridecane	629-50-5	Not Available	CCCCCCCCCCCCC
Angelicae Sinensis Radix	n-Pentadecane	629-62-9	Not Available	CCCCCCCCCCCCCCC
Angelicae Sinensis Radix	cetane	544-76-3	Not Available	CCCCCCCCCCCCCCCC
Angelicae Sinensis Radix	Eicosane	Not Available	8222	CCCCCCCCCCCCCCCCCCCC
Angelicae Sinensis Radix	Acetic Acid	64-19-7	Not Available	CC(=O)O
Angelicae Sinensis Radix	butyric acid	107-92-6	Not Available	CCCC(=O)O
Angelicae Sinensis Radix	Benzoic acid	65-85-0	Not Available	C1=CC=C(C=C1)C(=O)O
Angelicae Sinensis Radix	Heptadecanoic acid	506-12-7	Not Available	CCCCCCCCCCCCCCCCC(=O)O
Angelicae Sinensis Radix	Oleic acid	68609-92-7	Not Available	CCCCCCCC/C=C\CCCCCCCC(=O)O
Angelicae Sinensis Radix	Methyl pentadecanoate	68937-84-8	Not Available	CCCCCCCCCCCCCCC(=O)OC
Angelicae Sinensis Radix	methyl hexadecanoate	112-39-0	Not Available	CCCCCCCCCCCCCCCC(=O)OC
Angelicae Sinensis Radix	Methyl oleate	112-62-9	Not Available	CCCCCCCCC=CCCCCCCCC(=O)OC
Angelicae Sinensis Radix	Methyl linoleate	112-63-0	5284421	CCCCCC=CCC=CCCCCCCCC(=O)OC
Angelicae Sinensis Radix	Methyl linolenate	Not Available	5319706	CCC=CCC=CCC=CCCCCCCCC(=O)OC
Angelicae Sinensis Radix	Dibutyl phthalate	84-74-2	Not Available	CCCCOC(=O)C1=CC=CC=C1C(=O)OCCCC
Angelicae Sinensis Radix	Gaidic Acid	Not Available	5282743	CCCCCCCCCCCCCC=CC(=O)O
Angelicae Sinensis Radix	β-Cedrene	Not Available	11106485	CC1CCC2C13CCC(=C)C(C3)C2(C)C
Angelicae Sinensis Radix	Paeonol	552-41-0	Not Available	CC(=O)C1=C(C=C(C=C1)OC)O
Angelicae Sinensis Radix	Magnolol	528-43-8	Not Available	C=CCC1=CC(=C(C=C1)O)C2=C(C=CC(=C2)CC=C)O
Angelicae Sinensis Radix	Isoimperatorin	482-45-1	Not Available	CC(=CCOC1=C2C=CC(=O)OC2=CC3=C1C=CO3)C
Angelicae Sinensis Radix	Cytidine	65-46-3	Not Available	C1=CN(C(=O)N=C1N)C2C(C(C(O2)CO)O)O
Angelicae Sinensis Radix	Quercetin	117-39-5	Not Available	C1=CC(=C(C=C1C2=C(C(=O)C3=C(C=C(C=C3O2)O)O)O)O)O
Angelicae Sinensis Radix	Orientin	28608-75-5	Not Available	C1=CC(=C(C=C1C2=CC(=O)C3=C(O2)C(=C(C=C3O)O)C4C(C(C(C(O4)CO)O)O)O)O)O
Angelicae Sinensis Radix	Baicalin	21967-41-9	Not Available	C1=CC=C(C=C1)C2=CC(=O)C3=C(C(=C(C=C3O2)OC4C(C(C(C(O4)C(=O)O)O)O)O)O)O
Angelicae Sinensis Radix	quercetin-3-rhamnoside	522-12-3	Not Available	CC1C(C(C(C(O1)OC2=C(OC3=CC(=CC(=C3C2=O)O)O)C4=CC(=C(C=C4)O)O)O)O)O
Angelicae Sinensis Radix	3R,8S-falcarindiol	55297-87-5	Not Available	CCCCCCCC=CC(C#CC#CC(C=C)O)O
Angelicae Sinensis Radix	harmine	442-51-3	5280953	CC1=NC=CC2=C1NC3=C2C=CC(=C3)OC
Angelicae Sinensis Radix	Ligustilide	4431-01-0	5319022	CCCC=C1C2=C(C=CCC2)C(=O)O1
Angelicae Sinensis Radix	Z-ligutilide	Not Available	529865	CCCC=C1C2=C(C=CCC2)C(=O)O1
Angelicae Sinensis Radix	E-ligutilide	Not Available	5877292	CCCC=C1C2=C(C=CCC2)C(=O)O1
Angelicae Sinensis Radix	Z-butylidenephthalide	551-08-6	642376	CCCC=C1C2=CC=CC=C2C(=O)O1
Angelicae Sinensis Radix	senkyunolide J	Not Available	24121290	CCCCC1C2=C(C(C(CC2)O)O)C(=O)O1
Angelicae Sinensis Radix	4-(2-hydroxy-1-methoxyethyl) phenol	Not Available	Not Available	OC1=CC=C(C(OC)CO)C=C1
Angelicae Sinensis Radix	4-(2-hydroxy-1-ethoxyethyl) phenol	Not Available	Not Available	CCOC(C1=CC=C(O)C=C1)CO
Angelicae Sinensis Radix	4-hydroxy-3-butylphthalide	Not Available	Not Available	OC1=CC=CC2=C1C(CCCC)OC2=O
Angelicae Sinensis Radix	6-Butyl-1,4-cycloheptadiene	22735-58-6	Not Available	CCCCC1CC=CCC=C1
Angelicae Sinensis Radix	E-Butylidenephthalide	Not Available	Not Available	O=C1OC(C2=CC=CC=C21)=CCCC
Angelicae Sinensis Radix	α-Acoradiene	24048-44-0	Not Available	CC1CCC2(C=C1)C(CC=C2C(C)C)C
Angelicae Sinensis Radix	β-Acoradiene	28477-64-7	Not Available	CC1CCC(C12CCC(=CC2)C)C(=C)C
Angelicae Sinensis Radix	γ-Acoradiene	28400-12-6	Not Available	CC1CCC(=C(C)C)C12CCC(=CC2)C
Angelicae Sinensis Radix	δ-Acoradiene	28400-13-7	Not Available	CC1=CC[C@@]2([C@@H](CC/C2=C(C)\C)C)CC1
Angelicae Sinensis Radix	Alloocimene	673-84-7	5368821	CC=C(C)C=CC=C(C)C
Angelicae Sinensis Radix	Angelicide	Not Available	Not Available	O=C1OC2(C3=C1C=CCC3)C4C(CCC5=C4C(O/C5=C\CCC)=O)C2CCC
Angelicae Sinensis Radix	Anisic acid	1335-08-6	Not Available	COC1=CC=C(C=C1)C(=O)O
Angelicae Sinensis Radix	Azelaic acid	123-99-9	Not Available	C(CCCC(=O)O)CCCC(=O)O
Angelicae Sinensis Radix	Bicycloelemene	Not Available	Not Available	CC1CCCC2(C1=CC(=C(C)C)CC2)C
Angelicae Sinensis Radix	β-Bisabolene	495-61-4	Not Available	CC1=CCC(CC1)C(=C)CCC=C(C)C
Angelicae Sinensis Radix	Brefeldin A	20350-15-6	Not Available	CC1CCCC=CC2CC(CC2C(C=CC(=O)O1)O)O
Angelicae Sinensis Radix	3(S)-3-Butyl-4,5-dihydrophthalide	63038-10-8	Not Available	CCCCC1C2=C(C=CCC2)C(=O)O1
Angelicae Sinensis Radix	3-Butylidene-phalide	551-08-6	Not Available	CCCC=C1C2=CC=CC=C2C(=O)O1
Angelicae Sinensis Radix	Camphene	79-92-5	Not Available	CC1(C2CCC(C2)C1=C)C
Angelicae Sinensis Radix	Camphoric acid	Not Available	Not Available	CC1(C(CCC1(C)C(=O)O)C(=O)O)C
Angelicae Sinensis Radix	Carvacrol	499-75-2	Not Available	CC1=C(C=C(C=C1)C(C)C)O
Angelicae Sinensis Radix	α-Cedrene	469-61-4	Not Available	CC1CCC2C13CC=C(C(C3)C2(C)C)C
Angelicae Sinensis Radix	β-Chamigrene	18431-82-8	Not Available	CC1=CCC2(CC1)C(=C)CCCC2(C)C
Angelicae Sinensis Radix	Choline	62-49-7	Not Available	C[N+](C)(C)CCO
Angelicae Sinensis Radix	Cnidilide	Not Available	Not Available	CCCCC1C2CCC=CC2C(=O)O1
Angelicae Sinensis Radix	o-Cresol	95-48-7	Not Available	CC1=CC=CC=C1O
Angelicae Sinensis Radix	p-Cresol	106-44-5	Not Available	CC1=CC=C(C=C1)O
Angelicae Sinensis Radix	2,3-Dicresol	526-75-0	Not Available	CC1=C(C(=CC=C1)O)C
Angelicae Sinensis Radix	Dimethyl azelate	1732-10-1	Not Available	COC(=O)CCCCCCCC(=O)OC
Angelicae Sinensis Radix	Dimethyl camphorate	Not Available	Not Available	CC1(C(CCC1(C)C(=O)OC)C(=O)OC)C
Angelicae Sinensis Radix	Dimethyl phthalate	131-11-3	Not Available	COC(=O)C1=CC=CC=C1C(=O)OC
Angelicae Sinensis Radix	Dimethyl sebacate	106-79-6	Not Available	COC(=O)CCCCCCCCC(=O)OC
Angelicae Sinensis Radix	Dodecanol	112-53-8	Not Available	CCCCCCCCCCCCO
Angelicae Sinensis Radix	m-Ethylphenol	62185-53-9	12101	CCC1=CC(=CC=C1)O
Angelicae Sinensis Radix	p-Ethylphenol	105-79-3	31242	CCC1=CC=C(C=C1)O
Angelicae Sinensis Radix	4-Ethylresorcinol	2896-60-8	Not Available	CCC1=C(C=C(C=C1)O)O
Angelicae Sinensis Radix	Ferulic acid	537-98-4	Not Available	COC1=C(C=CC(=C1)C=CC(=O)O)O
Angelicae Sinensis Radix	Folic acid	59-30-3	Not Available	C1=CC(=CC=C1C(=O)NC(CCC(=O)O)C(=O)O)NCC2=CN=C3C(=N2)C(=O)N=C(N3)N
Angelicae Sinensis Radix	Folinic acid	58-05-9	143	C1C(N(C2=C(N1)NC(=NC2=O)N)C=O)CNC3=CC=C(C=C3)C(=O)NC(CCC(=O)O)C(=O)O
Angelicae Sinensis Radix	Hexadecanoic acid	57-10-3	985	CCCCCCCCCCCCCCCC(=O)O
Angelicae Sinensis Radix	Isocnidilide	Not Available	12315453	CCCCC1C2CCCC=C2C(=O)O
Angelicae Sinensis Radix	Isoeugenol	3779-61-1	853433	CC=CC1=CC(=C(C=C1)O)OC
Angelicae Sinensis Radix	Lignoceric acid	557-59-5	Not Available	CCCCCCCCCCCCCCCCCCCCCCCC(=O)O
Angelicae Sinensis Radix	2-Methyl-dodecane-5-one	477-29-2	5319599	O=C(C([H])([H])C([H])([H])C(C([H])([H])[H])([H])C([H])([H])[H])C([H])([H])C([H])([H])C([H])([H])C([H])([H])C([H])([H])C([H])([H])C([H])([H])[H]
Angelicae Sinensis Radix	Myristic acid	544-63-8	Not Available	CCCCCCCCCCCCCC(=O)O
Angelicae Sinensis Radix	Nicotinic acid	59-67-6	Not Available	C1=CC(=CN=C1)C(=O)O
Angelicae Sinensis Radix	β-Phellandrene	550-10-2	Not Available	CC(C)C1CCC(=C)C=C1
Angelicae Sinensis Radix	Phenol	108-95-2	Not Available	C1=CC=C(C=C1)O
Angelicae Sinensis Radix	Phthalic anhydride	85-44-9	Not Available	C1=CC=C2C(=C1)C(=O)OC2=O
Angelicae Sinensis Radix	Retinol	68-26-8	Not Available	CC1=C(C(CCC1)(C)C)C=CC(=CC=CC(=CCO)C)C
Angelicae Sinensis Radix	Scopoletin	92-61-5	Not Available	COC1=C(C=C2C(=C1)C=CC(=O)O2)O
Angelicae Sinensis Radix	Sebacic acid	111-20-6	Not Available	C(CCCCC(=O)O)CCCC(=O)O
Angelicae Sinensis Radix	Stigmasterol	83-48-7	Not Available	CCC(C=CC(C)C1CCC2C1(CCC3C2CC=C4C3(CCC(C4)O)C)C)C(C)C
Angelicae Sinensis Radix	Stigmasterol-β-D-glucoside	Not Available	Not Available	CCC(C=CC(C)C1CCC2C1(CCC3C2CC=C4C3(CCC(C4)OC5C(C(C(C(O5)CO)O)O)O)C)C)C(C)C
Angelicae Sinensis Radix	Succinic acid	110-15-6	Not Available	C(CC(=O)O)C(=O)O
Angelicae Sinensis Radix	1-Tetradecanol	112-72-1	Not Available	CCCCCCCCCCCCCCO
Angelicae Sinensis Radix	2,4,6-Trimethylbenzaldehyde	100009-82-3	10254	O=C([H])C1=C(C([H])([H])[H])C([H])=C(C([H])([H])[H])C([H])=C1C([H])([H])[H]
Angelicae Sinensis Radix	1,1,5-Trimethyl-2-formyl-cyclohexa-2,5-diene-4-one	95258-15-4	Not Available	O=C([H])C1=C([H])C(C(C([H])([H])[H])=C([H])C1(C([H])([H])[H])C([H])([H])[H])=O
Angelicae Sinensis Radix	Uracil	66-22-8	Not Available	C1=CNC(=O)NC1=O
Angelicae Sinensis Radix	n-Valerophenone-O-carboxylic acid	550-37-8	Not Available	O=C(O[H])C1=C([H])C([H])=C([H])C([H])=C1C(C([H])([H])C([H])([H])C([H])([H])C([H])([H])[H])=O
Angelicae Sinensis Radix	Vanillin	121-33-5	Not Available	COC1=C(C=CC(=C1)C=O)O
Angelicae Sinensis Radix	Vitamin B12	68-19-9	Not Available	CC1=CC2=C(C=C1C)N(C=N2)C3C(C(C(O3)CO)OP(=O)([O-])OC(C)CNC(=O)CCC4(C(C5C6(C(C(C(=C(C7=NC(=CC8=NC(=C(C4=N5)C)C(C8(C)C)CCC(=O)N)C(C7(C)CC(=O)N)CCC(=O)N)C)[N-]6)CCC(=O)N)(C)CC(=O)N)C)CC(=O)N)C)O.[C-]#N.[Co+3]
Angelicae Sinensis Radix	D-Limonene	17066-67-0	440917	CC1=CCC(CC1)C(=C)C
Angelicae Sinensis Radix	beta-Selinene	77160-91-9	442393	CC(=C)C1CCC2(CCCC(=C)C2C1)C
Angelicae Sinensis Radix	Nonanal	91-10-1	31289	CCCCCCCCC=O
Angelicae Sinensis Radix	Decanal	12385-08-9	8175	CCCCCCCCCC=O
Angelicae Sinensis Radix	Safrol	1406-55-9	5144	C=CCC1=CC2=C(C=C1)OCO2
Angelicae Sinensis Radix	Moslene/GAMMA-TERPINENE	27400-72-2	7461	CC1=CCC(=CC1)C(C)C
Angelicae Sinensis Radix	(+)-alpha-Terpineol	26531-51-1	442501	CC1=CCC(CC1)C(C)(C)O
Angelicae Sinensis Radix	(+)-3-Carene	8045-27-0	443156	CC1=CCC2C(C1)C2(C)C
Angelicae Sinensis Radix	Sitogluside	37831-70-2	5742590	CCC(CCC(C)C1CCC2C1(CCC3C2CC=C4C3(CCC(C4)OC5C(C(C(C(O5)CO)O)O)O)C)C)C(C)C
Angelicae Sinensis Radix	D-galacturonic acid	529-59-9	84740	C(=O)C(C(C(C(C(=O)O)O)O)O)O
Angelicae Sinensis Radix	Cis-ferulic acid	25525-15-9	1548883	COC1=C(C=CC(=C1)C=CC(=O)O)O
Angelicae Sinensis Radix	Eucarvone	556-18-3	136330	CC1=CC=CC(CC1=O)(C)C
Angelicae Sinensis Radix	(+)-gamma-cadinene	22255-40-9	6432404	CC1=CC2C(CC1)C(=C)CCC2C(C)C
Angelicae Sinensis Radix	Heptanal	823-40-5	8130	CCCCCCC=O
Angelicae Sinensis Radix	(+)-endo-beta-bergamotene	124-06-1	12300073	CC(=CCCC1(C2CCC(=C)C1C2)C)C
Angelicae Sinensis Radix	4-isopropylbenzaldehyde	1338-46-1	326	CC(C)C1=CC=C(C=C1)C=O
Angelicae Sinensis Radix	1-TRIDECENE	87-51-4	17095	CCCCCCCCCCCC=C
Angelicae Sinensis Radix	VERBENONE	108-24-7	65724	CC1=CC(=O)C2CC1C2(C)C
Angelicae Sinensis Radix	2'-Hydroxy-5'-methylacetophenone	79-63-0	15068	CC1=CC(=C(C=C1)O)C(=O)C
Angelicae Sinensis Radix	Azelex	2445-82-1	19347555	[H+].[H+].C(CCCC(=O)[O-])CCCC(=O)[O-]
Angelicae Sinensis Radix	Ledol	68988-18-1	92812	CC1CCC2C1C3C(C3(C)C)CCC2(C)O
Angelicae Sinensis Radix	Decanoic acid	187997-16-6	2969	CCCCCCCCCC(=O)O
Angelicae Sinensis Radix	Adenine	54976-54-4	190	C1=NC2=C(N1)C(=NC=N2)N
Angelicae Sinensis Radix	(R)-Cuparene	85566-12-7	86895	CC1=CC=C(C=C1)C2(CCCC2(C)C)C
Angelicae Sinensis Radix	(-)-Thujopsene	118374-94-0	442402	CC1=CCC2(CCCC(C23C1C3)(C)C)C
Angelicae Sinensis Radix	3-Butylidene-7-hydroxyphthalide	7069-41-2	5281559	CCCC=C1C2=C(C(=CC=C2)O)C(=O)O1
Angelicae Sinensis Radix	Levistolid A	66026-80-0	70698035	CCCC=C1C2=C(C3C(CC2)C4CCC35C(=C4)C(=O)OC5=CCCC)C(=O)O1
Angelicae Sinensis Radix	Alloocimene	51225-30-0	5368821	CC=C(C)C=CC=C(C)C
Angelicae Sinensis Radix	senkyunolide-C	16545-23-6	Not Available	OC(C1=C(C(OC)=C2OC)OC(C(C=C3)=CC=C3O)=CC1=O)=C2OC
Angelicae Sinensis Radix	senkyunolide-D/Esculetin	305-01-1	5281416	C1=CC(=O)OC2=CC(=C(C=C21)O)O
Angelicae Sinensis Radix	4-OCTANONE	141850-72-8	11516	CCCCC(=O)CCC
Angelicae Sinensis Radix	2-METHYL-3-BUTEN-2-OL	32659-21-5	8257	CC(C)(C=C)O
Angelicae Sinensis Radix	BETA-CADINENE	55128-06-8	10657	CC1=CCC2C(C1)C(CC=C2C)C(C)C
Angelicae Sinensis Radix	P-Mentha-1(7),3-diene	2922-51-2	66841	CC(C)C1=CCC(=C)CC1
Angelicae Sinensis Radix	Butanal	60186-78-9	261	CCCC=O
Angelicae Sinensis Radix	1-Hexadecanol	9007-33-4	2682	CCCCCCCCCCCCCCCCO
Angelicae Sinensis Radix	3,4-DIMETHYLBENZALDEHYDE	474-58-8	22278	CC1=C(C=C(C=C1)C=O)C
Angelicae Sinensis Radix	4-ETHYLBENZALDEHYDE	4602-84-0	20861	CCC1=CC=C(C=C1)C=O
Angelicae Sinensis Radix	2,3,5-trimethylbenzene-1,4-diol	92760-25-3	12785	CC1=CC(=C(C(=C1O)C)C)O
Angelicae Sinensis Radix	(1R,2S,4R)-1-ethyl-1-methyl-2,4-di(propan-2-yl)cyclohexane	80454-42-8	12309447	CCC1(CCC(CC1C(C)C)C(C)C)C
Angelicae Sinensis Radix	1-DODECENE	13382-86-0	8183	CCCCCCCCCCC=C
Angelicae Sinensis Radix	[(2R)-2-formyloxy-3-phosphonooxypropyl] formate	695-06-7	25163993	C(C(COP(=O)(O)O)OC=O)OC=O
Angelicae Sinensis Radix	1,2-Dimyristoyl-sn-glycero-3-phosphoethanolamine	38412-47-4	9852308	CCCCCCCCCCCCCC(=O)OCC(COP(=O)(O)OCCN)OC(=O)CCCCCCCCCCCCC
Angelicae Sinensis Radix	phosphatidylinositol	53657-29-7	53477912	C(C(COP(=O)(O)OC1C(C(C(C(C1O)O)O)O)O)OC=O)OC=O
Angelicae Sinensis Radix	(3R,3aS)-3-butyl-3a,4,5,6-tetrahydro-3H-2-benzofuran-1-one	58139-23-4	12315451	CCCCC1C2CCCC=C2C(=O)O1
Angelicae Sinensis Radix	(3R)-3-butyl-4,5-dihydro-3H-2-benzofuran-1-one	78277-79-9	54753664	CCCCC1C2=C(C=CCC2)C(=O)O1
Angelicae Sinensis Radix	sphingomyelin	5187-84-8	5353953	CCCCCCCCCCCCCCCCCC(=O)NC(COP(=O)([O-])OCC[N+](C)(C)C)C(C=CCCCCCCCCCCCCC)O
Angelicae Sinensis Radix	Isotetandrine	66211-83-4	5351212	CN1CCC2=CC(=C3C=C2C1CC4=CC=C(C=C4)OC5=C(C=CC(=C5)CC6C7=C(O3)C(=C(C=C7CCN6C)OC)OC)OC)OC
Angelicae Sinensis Radix	α-acoradiene	94021-48-4	6429151	CC1CCC2(C=C1)C(CC=C2C(C)C)C
Angelicae Sinensis Radix	α-copaene	31427-08-4	25245021	CC1=CCC2C3C1C2(CCC3C(C)C)C
Angelicae Sinensis Radix	4-epi-alpha-acoradiene	55950-32-8	13743810	CC1CCC(C12CCC(=CC2)C)C(=C)C
Angelicae Sinensis Radix	QENWKTQYINCUOX-UHFFFAOYSA-	149998-48-1	11832833	C1=CC=C(C=C1)C2=CC(=S)C=C(S2)C3=CC=CC=C3
Angelicae Sinensis Radix	(4S,6R)-2,4,6-trimethyloctane	217476-73-8	59734807	CCC(C)CC(C)CC(C)C
Angelicae Sinensis Radix	2,5-DIMETHYLBENZALDEHYDE	632-32-6	22015	CC1=CC(=C(C=C1)C)C=O
Angelicae Sinensis Radix	(3E)-3-Octadecene	122021-74-3	5365984	CCCCCCCCCCCCCCC=CCC
Angelicae Sinensis Radix	Trans-2-Hexenyl caproate	139051-27-7	5352973	CCCCCC(=O)OCC=CCCC
Angelicae Sinensis Radix	2-Methylhexadecanoic acid	90052-87-2	117384	CCCCCCCCCCCCCCC(C)C(=O)O
Angelicae Sinensis Radix	Cis-Isoeugenol	42719-32-4	1549041	C/C=C\C1=CC(=C(C=C1)O)OC
Angelicae Sinensis Radix	2-methyl-5-decanone	179457-66-0	537777	CCCCCC(=O)CCC(C)C
Angelicae Sinensis Radix	(3R,7R)-3,7-dimethylnonane	751-29-1	42626759	CCC(C)CCCC(C)CC
Angelicae Sinensis Radix	(4R)-4-methylhept-6-en-3-one	52705-93-8	25018179	CCC(=O)C(C)CC=C
Angelicae Sinensis Radix	5-Hydroxyindole	508-55-4	16054	C1=CC2=C(C=CN2)C=C1O
Angelicae Sinensis Radix	6-UNDECANOL	501-98-4	32045	CCCCCC(CCCCC)O
Angelicae Sinensis Radix	7,10-Pentadecadiynoicacid	52286-59-6	30942	CCCCC#CCC#CCCCCCC(=O)O
Angelicae Sinensis Radix	AC1LAIPP	128887-82-1	488866	CN1C=C(C=C1C(=O)NCCN2CCOCC2)NC(=O)C3=CC(=CN3C)NC(=O)C4=CC(=CN4C)NC(=O)C5=NSC(=C5Cl)NCCC6=CC=CC=N6
Angelicae Sinensis Radix	6-UNDECANONE	41744-39-2	13561	CCCCCC(=O)CCCCC
Angelicae Sinensis Radix	Isoamylbenzene	37744-61-9	16294	CC(C)CCC1=CC=CC=C1
Angelicae Sinensis Radix	2-Butenoic acid	14259-55-3	6440421	CC=C(C)C(=O)OCC(=CC)C(=O)O
Angelicae Sinensis Radix	Tropone	123-63-7	10881	C1=CC=CC(=O)C=C1
Angelicae Sinensis Radix	(1aR,4aS,7R,7aS,7bS)-1,1,7-trimethyl-4-methylidene-2,3,4a,5,6,7,7a,7b-octahydro-1aH-cyclopropa[e]azulene	77-52-1	12305247	CC1CCC2C1C3C(C3(C)C)CCC2=C
Angelicae Sinensis Radix	(3E)-3-butylidene-7-hydroxy-2-benzofuran-1-one	61303-13-7	5852943	CCCC=C1C2=C(C(=CC=C2)O)C(=O)O1
Angelicae Sinensis Radix	Coniferyl ferulate	6812-98-2	6441913	COC1=C(C=CC(=C1)C=CCOC(=O)C=CC2=CC(=C(C=C2)O)OC)O
Angelicae Sinensis Radix	1,2-Dimyristoyl-sn-glycero-3-phosphocholine	7224-66-0	5313082	CCCCCCCCCCCCCC(=O)OCC(COP(=O)(O)OCC[N+](C)(C)C)OC(=O)CCCCCCCCCCCCC
Angelicae Sinensis Radix	2,4-Dimethylbenzaldehyde	56485-42-8	61814	CC1=CC(=C(C=C1)C=O)C
Paeoniae Radix Alba	30-norhederagenin	Not Available	21596158	CC12CCC(C(C1CCC3(C2CC=C4C3(CCC5(C4CC(=C)CC5)C(=O)O)C)C)(C)CO)O
Paeoniae Radix Alba	paeonivayin	Not Available	46882920	CC12CC(C3CC1(C3(C(=O)O2)COC(=O)C4=CC=CC=C4)OC5C(C(C(C(O5)COC(=O)C6=CC=CC=C6)O)O)O)O
Paeoniae Radix Alba	Palmitic acid	57-10-3	985	CCCCCCCCCCCCCCCC(=O)O
Paeoniae Radix Alba	Phenylalanine	673-31-4	6140	C1=CC=C(C=C1)CC(C(=O)O)N
Paeoniae Radix Alba	Pyrogallol	87-66-1	1057	C1=CC(=C(C(=C1)O)O)O
Paeoniae Radix Alba	Betulinic acid	472-15-1	64971	CC(=C)C1CCC2(C1C3CCC4C5(CCC(C(C5CCC4(C3(CC2)C)C)(C)C)O)C)C(=O)O
Paeoniae Radix Alba	Benzoic acid	65-85-0	20144841	[H+].C1=CC=C(C=C1)C(=O)[O-]
Paeoniae Radix Alba	oleanolic acid	508-02-1	10494	CC1(CCC2(CCC3(C(=CCC4C3(CCC5C4(CCC(C5(C)C)O)C)C)C2C1)C)C(=O)O)C
Paeoniae Radix Alba	beta-sitosterol	83-46-5	222284	CCC(CCC(C)C1CCC2C1(CCC3C2CC=C4C3(CCC(C4)O)C)C)C(C)C
Paeoniae Radix Alba	kaempferol	520-18-3	5280863	C1=CC(=CC=C1C2=C(C(=O)C3=C(C=C(C=C3O2)O)O)O)O
Paeoniae Radix Alba	Cianidanol	154-23-4	9064	C1C(C(OC2=CC(=CC(=C21)O)O)C3=CC(=C(C=C3)O)O)O
Paeoniae Radix Alba	Gallic acid	149-91-7	370	C1=C(C=C(C(=C1O)O)O)C(=O)O
Paeoniae Radix Alba	Hederagenol	465-99-6	73299	CC1(CCC2(CCC3(C(=CCC4C3(CCC5C4(CCC(C5(C)CO)O)C)C)C2C1)C)C(=O)O)C
Paeoniae Radix Alba	Astragalin	480-10-4	5282102	C1=CC(=CC=C1C2=C(C(=O)C3=C(C=C(C=C3O2)O)O)O[C@H]4[C@@H]([C@H]([C@@H]([C@H](O4)CO)O)O)O)O
Paeoniae Radix Alba	Tridecane	629-50-5	12388	CCCCCCCCCCCCC
Paeoniae Radix Alba	ALPHA-CEDRENE	69-61-4	6431015	CC1CCC2C13CC=C(C(C3)C2(C)C)C
Paeoniae Radix Alba	Dibutyl phthalate	84-74-2	3026	CCCCOC(=O)C1=CC=CC=C1C(=O)OCCCC
Paeoniae Radix Alba	ETHYL ACETATE	141-78-6	8857	CCOC(=O)C
Paeoniae Radix Alba	stearic acid	609343-71-7	5281	CCCCCCCCCCCCCCCCCC(=O)O
Paeoniae Radix Alba	Heptadekan	629-78-7	12398	CCCCCCCCCCCCCCCCC
Paeoniae Radix Alba	EICOSANE	112-95-8	8222	CCCCCCCCCCCCCCCCCCCC
Paeoniae Radix Alba	Henicosane	629-94-7	12403	CCCCCCCCCCCCCCCCCCCCC
Paeoniae Radix Alba	paeonol	552-41-0	11092	CC(=O)C1=C(C=C(C=C1)OC)O
Paeoniae Radix Alba	Cedrol	77-53-2	65575	CC1CCC2C13CCC(C(C3)C2(C)C)(C)O
Paeoniae Radix Alba	1-DODECANOL	8032-08-4	8193	CCCCCCCCCCCCO
Paeoniae Radix Alba	(1R)-(+)-Nopinone	77982-63-9	157139	CC1(C2CCC(=O)C1C2)C
Paeoniae Radix Alba	myristic acid	45184-05-2	11005	CCCCCCCCCCCCCC(=O)O
Paeoniae Radix Alba	PENTADECYLIC ACID	1002-84-2	13849	CCCCCCCCCCCCCCC(=O)O
Paeoniae Radix Alba	Octacosane	630-02-4	12408	CCCCCCCCCCCCCCCCCCCCCCCCCCCC
Paeoniae Radix Alba	Dodecanal	112-54-9	8194	CCCCCCCCCCCC=O
Paeoniae Radix Alba	salicylic acid	7681-06-3	338	C1=CC=C(C(=C1)C(=O)O)O
Paeoniae Radix Alba	Cyclohexanol, 2,2-dimethyl-, (1S)-	1193-46-0	638180	CC1(CCCCC1O)C
Paeoniae Radix Alba	Methyl linolelaidate	2566-97-4	5362793	CCCCCC=CCC=CCCCCCCCC(=O)OC
Paeoniae Radix Alba	(E)-octadec-9-ene	7206-25-9	5364599	CCCCCCCCC=CCCCCCCCC
Paeoniae Radix Alba	9-methylenefluorene	4425-82-5	78147	C=C1C2=CC=CC=C2C3=CC=CC=C13
Paeoniae Radix Alba	Dipropyl phthalate	131-16-8	8559	CCCOC(=O)C1=CC=CC=C1C(=O)OCCC
Paeoniae Radix Alba	(2R,3R)-butane-2,3-diol	513-85-9	225936	CC(C(C)O)O
Paeoniae Radix Alba	DOTRIACONTANE	544-85-4	11008	CCCCCCCCCCCCCCCCCCCCCCCCCCCCCCCC
Paeoniae Radix Alba	2,6-DI-TERT-BUTYLPHENOL	128-39-2	31405	CC(C)(C)C1=C(C(=CC=C1)C(C)(C)C)O
Paeoniae Radix Alba	[(1R,5S)-6,6-dimethyl-4-bicyclo[3.1.1]hept-3-enyl]methanol	515-00-4	636475	CC1(C2CC=C(C1C2)CO)C
Paeoniae Radix Alba	(+)-trans-Myrtanol	15358-91-5	84880	CC1(C2CCC(C1C2)CO)C
Paeoniae Radix Alba	Acetyl oxide	108-24-7	7918	CC(=O)OC(=O)C
Paeoniae Radix Alba	(6S,10S)-6,10,14-trimethylpentadecan-2-one	502-69-2	1810797	CC(C)CCCC(C)CCCC(C)CCCC(=O)C
Paeoniae Radix Alba	23-hydroxybetulinic acid	85999-40-2	21672692	CC(=C)C1CCC2(C1C3CCC4C5(CCC(C(C5CCC4(C3(CC2)C)C)(C)CO)O)C)C(=O)O
Paeoniae Radix Alba	24-Methylenecycloartanol	1449-09-8	94204	CC(C)C(=C)CCC(C)C1CCC2(C1(CCC34C2CCC5C3(C4)CCC(C5(C)C)O)C)C
Paeoniae Radix Alba	Methylgallate	99-24-1	7428	COC(=O)C1=CC(=C(C(=C1)O)O)O
Paeoniae Radix Alba	ETHYL GALLATE	52441-13-1	13250	CCOC(=O)C1=CC(=C(C(=C1)O)O)O
Paeoniae Radix Alba	Propyl (2S)-2-hydroxypropanoate	616-09-1	10654258	CCCOC(=O)C(C)O
Paeoniae Radix Alba	Tannic acid	1401-55-4	16133691	CC(C(=O)CC1C(C(C(C(O1)COC(=O)C2=CC(=C(C=C2)O)OC(=O)C3=CC(=C(C=C3)O)OC(=O)C4=CC(=O)C(=O)C=C4)OC(=O)C5=CC(=C(C=C5)O)OC(=O)C6=CC(=C(C=C6)O)OC(=O)C7=CC(=O)C(=O)C(=C7)O)OC(=O)C8=CC(=C(C=C8)O)OC(=O)C9=CC(=O)C(=O)C(=C9)OC(=O)C1=CC(=C(C=C1)O)OC(=O)C1=CC(=O)C(=O)C(=C1)O)OC(=O)C1=CC(=C(C=C1)O)OC(=O)C1=CC(=C(C=C1)O)OC(=O)C1=CC(=O)C(=O)C(=C1)O)O
Paeoniae Radix Alba	paeonoside	25615-14-9	52952637	CC(=O)OCC1C(C(C(C(O1)OC2=CC(=C3C(=C2)OC(=C(C3=O)OC4C(C(C(C(O4)COC(=O)C)OC(=O)C)OC(=O)C)OC(=O)C)C5=CC=C(C=C5)OC(=O)C)OC(=O)C)OC(=O)C)OC(=O)C)OC(=O)C
Paeoniae Radix Alba	paeoniflorgenone	80454-42-8	133475	CC12CC(=O)C3CC1(OC(C3COC(=O)C4=CC=CC=C4)O2)O
Paeoniae Radix Alba	Palbinone	139954-00-0	9841735	CC1(C2CCC3(C(C2(CCC1O)C)C=CC4=C(C(=O)C(=O)C43C)O)C)C
Paeoniae Radix Alba	Lactiflorin	88623-95-4	5318917	CC12CC3C4(CC1C4(C(=O)O2)COC(=O)C5=CC=CC=C5)OC6C(C(C(OC6O3)CO)O)O
Paeoniae Radix Alba	2-Hexyl-1-decanol	2425-77-6	95337	CCCCCCCCC(CCCCCC)CO
Paeoniae Radix Alba	Paeonilactone C	98751-77-0	10471123	CC1(CC2C(CC1=O)C(C(=O)O2)COC(=O)C3=CC=CC=C3)O
Paeoniae Radix Alba	paeoniflorin	23180-57-6	442534	CC12CC3(C4CC1(C4(C(O2)O3)COC(=O)C5=CC=CC=C5)OC6C(C(C(C(O6)CO)O)O)O)O
Paeoniae Radix Alba	1,2,3,6-tetra-O-galloylglucose	79886-50-3	Not Available	Not Available
Paeoniae Radix Alba	albiflorin	39011-90-0	24868421	CC12CC(C3CC1(C3(C(=O)O2)COC(=O)C4=CC=CC=C4)OC5C(C(C(C(O5)CO)O)O)O)O
Paeoniae Radix Alba	Daucosterol	474-58-8	5742590	CCC(CCC(C)C1CCC2C1(CCC3C2CC=C4C3(CCC(C4)OC5C(C(C(C(O5)CO)O)O)O)C)C)C(C)C
Paeoniae Radix Alba	benzoyl paeoniflorin	38642-49-8	46882878	CC12CC3(C4CC1(C4(C(O2)O3)COC(=O)C5=CC=CC=C5)OC6C(C(C(C(O6)COC(=O)C7=CC=CC=C7)O)O)O)O
Paeoniae Radix Alba	4-Chlorobutyric acid	627-00-9	12300	C(CC(=O)O)CCl
Paeoniae Radix Alba	galloylpaeoniflorin	122965-41-7	46882879	CC12CC3(C4CC1(C4(C(O2)O3)COC(=O)C5=CC=CC=C5)OC6C(C(C(C(O6)COC(=O)C7=CC(=C(C(=C7)O)O)O)O)O)O)O
Paeoniae Radix Alba	oxypaeoniflorin	39011-91-1	429559	CC12CC3(C4CC1(C4(C(O2)O3)COC(=O)C5=CC=C(C=C5)O)OC6C(C(C(C(O6)CO)O)O)O)O
Paeoniae Radix Alba	Paeonilactone A	98751-79-2	10081437	CC1C2CC(=O)C(CC2OC1=O)(C)O
Paeoniae Radix Alba	Paeonilactone B	98751-78-1	10375422	CC1(CC2C(CC1=O)C(=C)C(=O)O2)O
Paeoniae Radix Alba	cis-5-Octen-1-ol	64275-73-6	5352837	CC/C=C\CCCCO
Paeoniae Radix Alba	5-Hexen-3-one	24253-30-3	141082	CCC(=O)CC=C
Paeoniae Radix Alba	Pentagalloylglucose	14937-32-7	65238	C1=C(C=C(C(=C1O)O)O)C(=O)OCC2C(C(C(C(O2)OC(=O)C3=CC(=C(C(=C3)O)O)O)OC(=O)C4=CC(=C(C(=C4)O)O)O)OC(=O)C5=CC(=C(C(=C5)O)O)O)OC(=O)C6=CC(=C(C(=C6)O)O)O
Paeoniae Radix Alba	Albiflorin R1	Not Available	Not Available	Not Available
Paeoniae Radix Alba	Casuarictin	79786-00-8	73644	C1C2C(C3C(C(O2)OC(=O)C4=CC(=C(C(=C4)O)O)O)OC(=O)C5=CC(=C(C(=C5C6=C(C(=C(C=C6C(=O)O3)O)O)O)O)O
Paeoniae Radix Alba	Casuariin	79786-04-2	14035442	C1C(C(OC(=O)C2=CC(=C(C(=C2C3=C(C(=C(C=C3C(=O)O1)O)O)O)O)O)O)C4C5C(C6=C(C(=C(C(=C6C(=O)O5)C7=C(C(=C(C=C7C(=O)O4)O)O)O)O)O)O)O)O
Paeoniae Radix Alba	5-Desgalloylstachyurin	115406-24-1	10417809	C1C(C(OC(=O)C2=CC(=C(C(=C2C3=C(C(=C(C=C3C(=O)O1)O)O)O)O)O)O)C4C5C(C6=C(C(=C(C(=C6C(=O)O5)C7=C(C(=C(C=C7C(=O)O4)O)O)O)O)O)O)O)O
Paeoniae Radix Alba	Eugeniin	58970-75-5	442679	C1C2C(C(C(C(O2)OC(=O)C3=CC(=C(C(=C3)O)O)O)OC(=O)C4=CC(=C(C(=C4)O)O)O)OC(=O)C5=CC(=C(C(=C5)O)O)O)OC(=O)C6=CC(=C(C(=C6C7=C(C(=C(C=C7C(=O)O1)O)O)O)O)O)O
Paeoniae Radix Alba	1-O-Galloyl-glucose	Not Available	124021	C1=C(C=C(C(=C1O)O)O)C(=O)OC2C(C(C(C(O2)CO)O)O)O
Paeoniae Radix Alba	13-Methyl tetradecanoic acid	2485-71-4	Not Available	Not Available
Paeoniae Radix Alba	Paeonianin E	Not Available	46883515	CC12CC(=O)C3CC1(C3(C(O2)OCC4C(C(C(C(O4)OC56CC7C5(C8OC6(CC7(O8)O)C)COC(=O)C9=CC=CC=C9)O)O)O)COC(=O)C1=CC=CC=C1)OC1C(C(C(C(O1)CO)O)O)O
Paeoniae Radix Alba	Paeonianin A	Not Available	44253993	CC12CC(=O)C3CC1(C3(C(O2)OC)COC(=O)C4=CC=CC=C4)OC5C(C(C(C(O5)COC(=O)C6=CC=CC=C6)O)O)O
Paeoniae Radix Alba	Paeonianin C	Not Available	46883513	CC12CC(=O)C3CC1(C3(C(O2)OC)COC(=O)C4=CC=C(C=C4)O)OC5C(C(C(C(O5)COC(=O)C6=CC=CC=C6)O)O)O
Paeoniae Radix Alba	Paeonianin D	Not Available	46883514	CC12CC(=O)C3CC1(C3(C(O2)OC)COC(=O)C4=CC=CC=C4)OC5C(C(C(C(O5)COC6C7(C8CC7(C(O6)(CC8=O)C)OC9C(C(C(C(O9)CO)O)O)O)COC(=O)C1=CC=CC=C1)O)O)O
Paeoniae Radix Alba	Pedunculagin	7045-42-3	442688	C1C2C(C3C(C(O2)O)OC(=O)C4=CC(=C(C(=C4C5=C(C(=C(C=C5C(=O)O3)O)O)O)O)O)O)OC(=O)C6=CC(=C(C(=C6C7=C(C(=C(C=C7C(=O)O1)O)O)O)O)O)O
Paeoniae Radix Alba	Peonin	132-37-6	44256843	COC1=C(C=CC(=C1)C2=C(C=C3C(=CC(=CC3=[O+]2)O)OC4C(C(C(C(O4)CO)O)O)O)OC5C(C(C(C(O5)CO)O)O)O)O
Paeoniae Radix Alba	Phenol	108-95-2	996	C1=CC=C(C=C1)O
Paeoniae Radix Alba	Pyrethrin I	121-21-1	579153	CC1=C(C(=O)CC1OC(=O)C2C(C2(C)C)C=C(C)C)CC=CC=C
Paeoniae Radix Alba	Pyrethrin II	121-29-9	6433155	CC1=C(C(=O)CC1OC(=O)C2C(C2(C)C)C=C(C)C(=O)OC)CC=CC=C
Paeoniae Radix Alba	Strictinin	517-46-4	73330	C1C2C(C(C(C(O2)OC(=O)C3=CC(=C(C(=C3)O)O)O)O)O)OC(=O)C4=CC(=C(C(=C4C5=C(C(=C(C=C5C(=O)O1)O)O)O)O)O)O
Chuanxiong Rhizoma	nonylbenzene	1081-77-2	14126	CCCCCCCCCC1=CC=CC=C1
Chuanxiong Rhizoma	Spathulenol	Not Available	522266	CC1(C2C1C3C(CCC3(C)O)C(=C)CC2)C
Chuanxiong Rhizoma	9-octadecenoic acid[2]-ethylester	111-62-6	8123	CCCCCCCCC=CCCCCCCCC(=O)OCC
Chuanxiong Rhizoma	eicosane	112-95-8	8222	CCCCCCCCCCCCCCCCCCCC
Chuanxiong Rhizoma	2-methyl eicosane	1560-84-5	519146	CCCCCCCCCCCCCCCCCCC(C)C
Chuanxiong Rhizoma	9,12,15-octadecatrienoic acid methyl ester	301-00-8	9316	CCC=CCC=CCC=CCCCCCCCC(=O)OC
Chuanxiong Rhizoma	16-octadecenoic acid methyl ester	56554-49-5	5364513	CC=CCCCCCCCCCCCCCCC(=O)OC
Chuanxiong Rhizoma	9-octadecenoic acid methyl ester	2462-84-2	8202	CCCCCCCCC=CCCCCCCCC(=O)OC
Chuanxiong Rhizoma	octadecanoic acid methyl ester	112-61-8	8201	CCCCCCCCCCCCCCCCCC(=O)OC
Chuanxiong Rhizoma	4-Hydroxybenzoic acid	99-96-7	135	C1=CC(=CC=C1C(=O)O)O
Chuanxiong Rhizoma	Protocatechualdehyde	139-85-5	8768	C1=CC(=C(C=C1C=O)O)O
Chuanxiong Rhizoma	z-ligustilide	Not Available	529865	CCCC=C1C2=C(C=CCC2)C(=O)O1
Chuanxiong Rhizoma	3-carene	13466-78-9	26049	CC1=CCC2C(C1)C2(C)C
Chuanxiong Rhizoma	limonene	138-86-3	22311	CC1=CCC(CC1)C(=C)C
Chuanxiong Rhizoma	succinic acid	110-15-6	1110	C(CC(=O)O)C(=O)O
Chuanxiong Rhizoma	heptadecanoic acid	506-12-7	10465	CCCCCCCCCCCCCCCCC(=O)O
Chuanxiong Rhizoma	MONOPALMITIN	542-44-9	14900	CCCCCCCCCCCCCCCC(=O)OCC(CO)O
Chuanxiong Rhizoma	3(R), 8 (S), 9(Z)2falcarindiol	225110-25-8	5281148	CCCCCCCC=CC(C#CC#CC(C=C)O)O
Chuanxiong Rhizoma	β-Terpineol	Not Available	5885030	COC1=CC(=CC(=C1OC2C(C(C(C(O2)CO)O)O)O)OC)C=CCO
Chuanxiong Rhizoma	Terpinen-4-ol	562-74-3	11230	CC1=CCC(CC1)(C(C)C)O
Chuanxiong Rhizoma	Eugenol	97-53-0	3314	COC1=C(C=CC(=C1)CC=C)O
Chuanxiong Rhizoma	DihydrocurcuMin	Not Available	10429233	COC1=C(C=CC(=C1)CCC(=O)CC(=O)/C=C/C2=CC(=C(C=C2)O)OC)O
Chuanxiong Rhizoma	ALPHA-PHELLANDRENE	99-83-2	7460	CC1=CCC(C=C1)C(C)C
Chuanxiong Rhizoma	1-PHENYL-1-PENTYNE	4250-81-1	77923	CCCC#CC1=CC=CC=C1
Chuanxiong Rhizoma	Decahydronaphthalene	91-17-8	7044	C1CCC2CCCCC2C1
Chuanxiong Rhizoma	2-Chloroacetophenone	532-27-4	10757	C1=CC=C(C=C1)C(=O)CCl
Chuanxiong Rhizoma	(+)-TRANS-LIMONENE 1,2-EPOXIDE	6909-30-4	449290	C1=CC=C(C=C1)C(=O)CCl
Chuanxiong Rhizoma	spathalenol	Not Available	92231	CC1(C2C1C3C(CCC3(C)O)C(=C)CC2)C
Chuanxiong Rhizoma	Cedrenol	28231-03-0	119831	CC1CCC2C13CC(C2(C)C)C(=C)C(C3)O
Chuanxiong Rhizoma	CARYOPHYLLENE OXIDE	1139-30-6	1742210	CC1(CC2C1CCC3(C(O3)CCC2=C)C)C
Chuanxiong Rhizoma	Myristic acid	544-63-8	11005	CCCCCCCCCCCCCC(=O)O
Chuanxiong Rhizoma	1-PENTADECANOL	629-76-5	12397	CCCCCCCCCCCCCCCO
Chuanxiong Rhizoma	PENTADECANOIC ACID	1002-84-2	13849	CCCCCCCCCCCCCCC(=O)O
Chuanxiong Rhizoma	1-HEPTADECANOL	1454-85-9	15076	CCCCCCCCCCCCCCCCCO
Chuanxiong Rhizoma	PHYTOL	150-86-7	5366244	CC(C)CCCC(C)CCCC(C)CCCC(=CCO)C
Chuanxiong Rhizoma	alpha-Cypermethrin	67375-30-8	12617365	CC1(C(C1C(=O)OC(C#N)C2=CC(=CC=C2)OC3=CC=CC=C3)C=C(Cl)Cl)C
Chuanxiong Rhizoma	Dibutyl phthalate	84-74-2	3026	CCCCOC(=O)C1=CC=CC=C1C(=O)OCCCC
Chuanxiong Rhizoma	Apigenin	520-36-5	5280443	C1=CC(=CC=C1C2=CC(=O)C3=C(C=C(C=C3O2)O)O)O
Chuanxiong Rhizoma	alpha-thujene	2867-05-2	17868	CC1=CCC2(C1C2)C(C)C
Chuanxiong Rhizoma	alpha-pinene	80-56-8	6654	CC1=CCC2CC1C2(C)C
Chuanxiong Rhizoma	sabinene	3387-41-5	18818	CC(C)C12CCC(=C)C1C2
Chuanxiong Rhizoma	beta-pinene	127-91-3	14896	CC1(C2CCC(=C)C1C2)C
Chuanxiong Rhizoma	n-octanol	111-87-5	957	CCCCCCCCO
Chuanxiong Rhizoma	alpha-terpinolene	586-62-9	11463	CC1=CCC(=C(C)C)CC1
Chuanxiong Rhizoma	linalool	78-70-6	6549	CC(=CCCC(C)(C=C)O)C
Chuanxiong Rhizoma	myrcenol	543-39-5	10975	CC(C)(CCCC(=C)C=C)O
Chuanxiong Rhizoma	n-butyl angelate	Not Available	5364789	CCCCOC(=O)C(=CC)C
Chuanxiong Rhizoma	camphor	76-22-2	2537	CC1(C2CCC1(C(=O)C2)C)C
Chuanxiong Rhizoma	isoborneol	124-76-5	512289	CC1(C2CCC1(C(C2)O)C)C
Chuanxiong Rhizoma	alpha-terpincol	8000-41-7	17100	CC1=CCC(CC1)C(C)(C)O
Chuanxiong Rhizoma	n-decanal	112-31-2	8175	CCCCCCCCCC=O
Chuanxiong Rhizoma	verbenone	1196-01-6	29025	CC1=CC(=O)C2CC1C2(C)C
Chuanxiong Rhizoma	carvone	99-49-0	7439	CC1=CCC(CC1=O)C(=C)C
Chuanxiong Rhizoma	piperitone	89-81-6	6987	CC1=CC(=O)C(CC1)C(C)C
Chuanxiong Rhizoma	bornyl acetate	76-49-3	6448	CC(=O)OC1CC2CCC1(C2(C)C)C
Chuanxiong Rhizoma	undecanal	112-44-7	8186	CCCCCCCCCCC=O
Chuanxiong Rhizoma	carvacrol	499-75-2	10364	CC1=C(C=C(C=C1)C(C)C)O
Chuanxiong Rhizoma	beta-catyophyllene	87-44-5	5281515	CC1=CCCC(=C)C2CC(C2CC1)(C)C
Chuanxiong Rhizoma	gamma-patchoulene	Not Available	521302	CC1CCC23C1CC(C2(C)C)CCC3=C
Chuanxiong Rhizoma	Methyl 3,4-dimethylbenzoate	38404-42-1	520902	CC1=C(C=C(C=C1)C(=O)OC)C
Chuanxiong Rhizoma	7-Methoxybenzofuran-2-carboxylic acid	4790-79-8	606037	COC1=CC=CC2=C1OC(=C2)C(=O)O
Chuanxiong Rhizoma	4-N-HEPTYLPHENOL	1987-50-4	16143	CCCCCCCC1=CC=C(C=C1)O
Chuanxiong Rhizoma	o-Cresol	95-48-7	335	CC1=CC=CC=C1O
Chuanxiong Rhizoma	Comphene	565-00-4	6616	CC1(C2CCC(C2)C1=C)C
Chuanxiong Rhizoma	p-Cresol	106-44-5	2879	CC1=CC=C(C=C1)O
Chuanxiong Rhizoma	2-Methyl-1-phenyl-2-propanol	100-86-7	7531	CC(C)(CC1=CC=CC=C1)O
Chuanxiong Rhizoma	2'-Hydroxy-4'-methylacetophenone	6921-64-8	81338	CC1=CC(=C(C=C1)C(=O)C)O
Chuanxiong Rhizoma	Butyraldehyde	123-72-8	261	CCCC=O
Chuanxiong Rhizoma	ISOAMYLBENZENE	2049-94-7	16294	CC(C)CCC1=CC=CC=C1
Chuanxiong Rhizoma	TROPONE	539-80-0	10881	C1=CC=CC(=O)C=C1
Chuanxiong Rhizoma	5-Hydroxyindole	1953-54-4	16054	C1=CC2=C(C=CN2)C=C1O
Chuanxiong Rhizoma	8-Quinolinemethanol	16032-35-2	594412	C1=CC2=C(C(=C1)CO)N=CC=C2
Chuanxiong Rhizoma	SEDANOLIDE	6415-59-4	5018391	CCCCC1C2CCCC=C2C(=O)O1
Chuanxiong Rhizoma	BETA-ELEMENE	33880-83-0	6918391	CC(=C)C1CCC(C(C1)C(=C)C)(C)C=C
Chuanxiong Rhizoma	1,3-Butanediol	107-88-0	7896	CC(CCO)O
Chuanxiong Rhizoma	Squalene	7683-64-9	638072	CC(=CCCC(=CCCC(=CCCC=C(C)CCC=C(C)CCC=C(C)C)C)C)C
Chuanxiong Rhizoma	Butyric Acid	107-92-6	264	CCCC(=O)O
Chuanxiong Rhizoma	OCIMENE	13877-91-3	5281553	CC(=CCC=C(C)C=C)C
Chuanxiong Rhizoma	tridecane	629-50-5	12388	CCCCCCCCCCCCC
Chuanxiong Rhizoma	linalyl propionate	144-39-8	61098	CCC(=O)OC(C)(CCC=C(C)C)C=C
Chuanxiong Rhizoma	γ-elemene	Not Available	6432312	CC(=C1CCC(C(C1)C(=C)C)(C)C=C)C
Chuanxiong Rhizoma	(+)-Camphene	5794-03-6	92221	CC1(C2CCC(C2)C1=C)C
Chuanxiong Rhizoma	alpha-humulene	19132-75-3	5281520	CC1=CCC(C=CCC(=CCC1)C)(C)C
Chuanxiong Rhizoma	alpha-Curcumene	4176-17-4	442360	CC1=CC=C(C=C1)C(C)CCC=C(C)C
Chuanxiong Rhizoma	2-[(1R,3S,4S)-3-isopropenyl-4-methyl-4-vinylcyclohexyl]propan-2-ol	639-99-6	92138	CC(=C)C1CC(CCC1(C)C=C)C(C)(C)O
Chuanxiong Rhizoma	beta-Selinene	17066-67-0	442393	CC(=C)C1CCC2(CCCC(=C)C2C1)C
Chuanxiong Rhizoma	palmitic acid	67701-02-4	985	CCCCCCCCCCCCCCCC(=O)O
Chuanxiong Rhizoma	vanillic acid	121-34-6	8468	COC1=C(C=CC(=C1)C(=O)O)O
Chuanxiong Rhizoma	Nonanal	75718-12-6	31289	CCCCCCCCC=O
Chuanxiong Rhizoma	P-CYMENE	4939-75-7	7463	CC1=CC=C(C=C1)C(C)C
Chuanxiong Rhizoma	(L)-alpha-Terpineol	10482-56-1	443162	CC1=CCC(CC1)C(C)(C)O
Chuanxiong Rhizoma	1,8-cineole	470-82-6	2758	CC1(C2CCC(O1)(CC2)C)C
Chuanxiong Rhizoma	(-)-alpha-Pinene	7785-26-4	440968	CC1=CCC2CC1C2(C)C
Chuanxiong Rhizoma	(-)-nopinene	18172-67-3	440967	CC1(C2CCC(=C)C1C2)C
Chuanxiong Rhizoma	EIC	2197-37-7	5280450	CCCCCC=CCC=CCCCCCCCC(=O)O
Chuanxiong Rhizoma	2-[(2S,5S,6S)-6,10-dimethylspiro[4.5]dec-9-en-2-yl]propan-2-ol	1460-73-7	10353528	CC1CCC=C(C12CCC(C2)C(C)(C)O)C
Chuanxiong Rhizoma	Furol	98-01-1	7362	C1=COC(=C1)C=O
Chuanxiong Rhizoma	L-Bornyl acetate	6626-35-3	93009	CC(=O)OC1CC2CCC1(C2(C)C)C
Chuanxiong Rhizoma	Myrcene	123-35-3	31253	CC(=CCCC(=C)C=C)C
Chuanxiong Rhizoma	(R)-linalool	126-91-0	443158	CC(=CCCC(C)(C=C)O)C
Chuanxiong Rhizoma	(S)-(+)-alpha-Phellandrene	2243-33-6	443160	CC1=CCC(C=C1)C(C)C
Chuanxiong Rhizoma	Moslene	99-85-4	7461	CC1=CCC(=CC1)C(C)C
Chuanxiong Rhizoma	-cis-.beta.-Elemene diastereomer	515-13-9	6431152	CC(=C)C1CCC(C(C1)C(=C)C)(C)C=C
Chuanxiong Rhizoma	Methyleugenol	93-15-2	7127	COC1=C(C=C(C=C1)CC=C)OC
Chuanxiong Rhizoma	Aromadendrene	489-39-4	11095734	CC1CCC2C1C3C(C3(C)C)CCC2=C
Chuanxiong Rhizoma	caffeic acid	71693-97-5	689043	C1=CC(=C(C=C1C=CC(=O)O)O)O
Chuanxiong Rhizoma	L-Limonen	5989-54-8	439250	CC1=CCC(CC1)C(=C)C
Chuanxiong Rhizoma	(1S,5S)-1-isopropyl-4-methylenebicyclo[3.1.0]hexane	87-41-5	11051711	CC(C)C12CCC(=C)C1C2
Chuanxiong Rhizoma	Undekansaeure	112-37-8	8180	CCCCCCCCCCC(=O)O
Chuanxiong Rhizoma	daucosterol	474-58-8	5742590	CCC(CCC(C)C1CCC2C1(CCC3C2CC=C4C3(CCC(C4)OC5C(C(C(C(O5)CO)O)O)O)C)C)C(C)C
Chuanxiong Rhizoma	sitosterol	83-46-5	12303645	CCC(CCC(C)C1CCC2C1(CCC3C2CC=C4C3(CCC(C4)O)C)C)C(C)C
Chuanxiong Rhizoma	FERULIC ACID (CIS)	25525-15-9	1548883	COC1=C(C=CC(=C1)C=CC(=O)O)O
Chuanxiong Rhizoma	Terpinen-4-ol	2438-10-0	2724161	CC1=CCC(CC1)(C(C)C)O
Chuanxiong Rhizoma	vanillin	121-33-5	1183	COC1=C(C=CC(=C1)C=O)O
Chuanxiong Rhizoma	hexanal	66-25-1	6184	CCCCCC=O
Chuanxiong Rhizoma	PENTYLFURAN	64079-01-2	19602	CCCCCC1=CC=CO1
Chuanxiong Rhizoma	oleic acid	17156-84-2	445639	CCCCCCCCC=CCCCCCCCC(=O)O
Chuanxiong Rhizoma	(R)-(-)-alpha-Phellandrene	4221-98-1	442482	CC1=CCC(C=C1)C(C)C
Chuanxiong Rhizoma	Heptaldehyde	111-71-7	8130	CCCCCCC=O
Chuanxiong Rhizoma	OYA	124-13-0	454	CCCCCCCC=O
Chuanxiong Rhizoma	o-Cymol	1329-98-2	10703	CC1=CC=CC=C1C(C)C
Chuanxiong Rhizoma	sucrose	25702-74-3	5988	C(C1C(C(C(C(O1)OC2(C(C(C(O2)CO)O)O)CO)O)O)O)O
Chuanxiong Rhizoma	stearic acid	609343-71-7	5281	CCCCCCCCCCCCCCCCCC(=O)O
Chuanxiong Rhizoma	Pentadecane	629-62-9	12391	CCCCCCCCCCCCCCC
Chuanxiong Rhizoma	methyl palmitate	112-39-0	8181	CCCCCCCCCCCCCCCC(=O)OC
Chuanxiong Rhizoma	tetradecane	90622-46-1	12389	CCCCCCCCCCCCCC
Chuanxiong Rhizoma	Terpilene	99-86-5	7462	CC1=CC=C(CC1)C(C)C
Chuanxiong Rhizoma	(R)-p-Menth-1-en-4-ol	20126-76-5	5325830	CC1=CCC(CC1)(C(C)C)O
Chuanxiong Rhizoma	alpha-Farnesene	502-61-4	5281516	CC(=CCCC(=CCC=C(C)C=C)C)C
Chuanxiong Rhizoma	.gamma.-Bisabolene	495-62-5	5352437	CC1=CCC(=C(C)CCC=C(C)C)CC1
Chuanxiong Rhizoma	58870_FLUKA	95910-36-4	15431199	CC1CCC2C(C2(C)C)C3=C1CCC3C
Chuanxiong Rhizoma	Ethylpalmitate	628-97-7	12366	CCCCCCCCCCCCCCCC(=O)OCC
Chuanxiong Rhizoma	5-isopropyl-2-methylbicyclo[3.1.0]hex-2-ene	1406-51-5	637518	CC1=CCC2(C1C2)C(C)C
Chuanxiong Rhizoma	(1R,5R,7S)-4,7-dimethyl-7-(4-methylpent-3-enyl)bicyclo[3.1.1]hept-3-ene	79-92-5	13889654	CC1=CCC2CC1C2(C)CCC=C(C)C
Chuanxiong Rhizoma	(4S)-4-isopropylcyclohexene-1-carbaldehyde	21391-98-0	11842593	CC(C)C1CCC(=CC1)C=O
Chuanxiong Rhizoma	(S)-2,2,3-Trimethylcyclopent-3-ene-1-acetaldehyde	23727-15-3	90969	CC1=CCC(C1(C)C)CC=O
Chuanxiong Rhizoma	o-Acetyl-p-cresol	1450-72-2	15068	CC1=CC(=C(C=C1)O)C(=O)C
Chuanxiong Rhizoma	WLN: Q1R	1336-27-2	244	C1=CC=C(C=C1)CO
Chuanxiong Rhizoma	(-)-Globulol	489-41-8	12304985	CC1CCC2C1C3C(C3(C)C)CCC2(C)O
Chuanxiong Rhizoma	Mandenol	544-35-4	5282184	CCCCCC=CCC=CCCCCCCCC(=O)OCC
Chuanxiong Rhizoma	METHYL LINOLEATE	112-63-0	5284421	CCCCCC=CCC=CCCCCCCCC(=O)OC
Chuanxiong Rhizoma	Chrysophanol	481-74-3	10208	CC1=CC(=C2C(=C1)C(=O)C3=C(C2=O)C(=CC=C3)O)O
Chuanxiong Rhizoma	uracil	66-22-8	1174	C1=CNC(=O)NC1=O
Chuanxiong Rhizoma	4-Hydroxy-3-methoxystyrene	7786-61-0	332	COC1=C(C=CC(=C1)C=C)O
Chuanxiong Rhizoma	Adenosine	30143-02-3	60961	C1=NC2=C(C(=N1)N)N=CN2C3C(C(C(O3)CO)O)O
Chuanxiong Rhizoma	adenine	73-24-5	190	C1=NC2=C(N1)C(=NC=N2)N
Chuanxiong Rhizoma	METHYL PENTADECANOATE	7132-64-1	23518	CCCCCCCCCCCCCCC(=O)OC
Chuanxiong Rhizoma	(+)-beta-Phellandrene	555-10-2	442484	CC(C)C1CCC(=C)C=C1
Chuanxiong Rhizoma	thymol	89-83-8	6989	CC1=CC(=C(C=C1)C(C)C)O
Chuanxiong Rhizoma	alpha-Cubebene	17699-14-8	86609	CC1CCC(C2C13C2C(=CC3)C)C(C)C
Chuanxiong Rhizoma	(+)-ALPHA-FUNEBRENE	50894-66-1	6552024	CC1CCC2C13CC=C(C(C3)C2(C)C)C
Chuanxiong Rhizoma	gem-Dimethylcyclopentane	1638-26-2	15421	CC1(CCCC1)C
Chuanxiong Rhizoma	3-Butylidene-7-hydroxyphthalide	93236-67-0	5281559	CCCC=C1C2=C(C(=CC=C2)O)C(=O)O1
Chuanxiong Rhizoma	Senkyunolide K	114569-33-4	Not Available	Not Available
Chuanxiong Rhizoma	(3Z,6S,7R)-3-butylidene-6-butyryl-7-hydroxy-4,5,6,7-tetrahydroisobenzofuran-1-one	114569-34-5	11265913	CCCC=C1C2=C(C(C(CC2)C(=O)CCC)O)C(=O)O1
Chuanxiong Rhizoma	Senkyunolide-N	140694-58-2	15138552	Not Available
Chuanxiong Rhizoma	Levistolid A	88182-33-6	70698035	CCCC=C1C2=C(C3C(CC2)C4CCC35C(=C4)C(=O)OC5=CCCC)C(=O)O1
Chuanxiong Rhizoma	Senkyunolide-P	142864-23-1	91731751	CCCCC1C23CCC(C=C2C(=O)O1)C4C3C5=C(CC4)C(=CCCC)OC5=O
Chuanxiong Rhizoma	Senkyunolide-Q	142235-81-2	Not Available	Not Available
Chuanxiong Rhizoma	Senkyunolide-R	172549-37-0	Not Available	Not Available
Chuanxiong Rhizoma	1,1-Diethoxybutane	3658-95-5	77225	CCCC(OCC)OCC
Chuanxiong Rhizoma	Valerophenone	1009-14-9	66093	CCCCC(=O)C1=CC=CC=C1
Chuanxiong Rhizoma	(1S,5S)-7,7-dimethyl-2-methylenebicyclo[3.1.1]hept-3-ene	4080-46-0	21631119	CC1(C2CC1C(=C)C=C2)C
Chuanxiong Rhizoma	Z-6,8',7,3'-diligustilide	Not Available	Not Available	Not Available
Chuanxiong Rhizoma	Allocymene	673-84-7	5368821	CC=C(C)C=CC=C(C)C
Chuanxiong Rhizoma	alpha-Selinene	473-13-2	10856614	CC1=CCCC2(C1CC(CC2)C(=C)C)C
Chuanxiong Rhizoma	augustic-acid	26707-60-8	15560128	CC1(CCC2(CCC3(C(=CCC4C3(CCC5C4(CC(C(C5(C)C)O)O)C)C)C2C1)C)C(=O)O)C
Chuanxiong Rhizoma	m-Ethyltoluene	620-14-4	12100	CCC1=CC=CC(=C1)C
Chuanxiong Rhizoma	(1R,4S,5R)-4-isopropenyl-1,8-dimethylspiro[4.5]dec-8-ene	28400-13-7	20055537	CC1CCC(C12CCC(=CC2)C)C(=C)C
Chuanxiong Rhizoma	β-sesquiphellandrene	20307-83-9	12315492	CC(CCC=C(C)C)C1CCC(=C)C=C1
Chuanxiong Rhizoma	(4aS,7S,8aR)-7-isopropenyl-4a-methyl-1-methylenedecalin	18423-23-9	28237	CC(=C)C1CCC2(CCCC(=C)C2C1)C
Chuanxiong Rhizoma	Artemisia triene	29548-02-5	5320377	CC(=C)C=CC(C)(C)C=C
Chuanxiong Rhizoma	betea-CUBEBENE	13744-15-5	93081	CC1CCC(C2C13C2C(=C)CC3)C(C)C
Chuanxiong Rhizoma	Bicyclogermacrene	24703-35-3	11820258	CC1=CCCC(=CC2C(C2(C)C)CC1)C
Chuanxiong Rhizoma	Chuanxiongol	87421-30-5	5315862	CCCC=C1C2=C(C=CC=C2O)C(=O)CO1
Chuanxiong Rhizoma	beta-asarone	5273-86-9	5281758	CC=CC1=CC(=C(C=C1OC)OC)OC
Chuanxiong Rhizoma	cis-Piperitol	16721-38-3	85567	CC1=CC(C(CC1)C(C)C)O
Chuanxiong Rhizoma	(1S,4R,5R)-1-isopropyl-4-methyl-4-bicyclo[3.1.0]hexanol	546-79-2	6326181	CC(C)C12CCC(C1C2)(C)O
Chuanxiong Rhizoma	Cnidilide	3674-03-1	160710	CCCCC1C2CCC=CC2C(=O)O1
Chuanxiong Rhizoma	1,3,8-p-Menthatriene	18368-95-1	176983	CC1=CC=C(CC1)C(=C)C
Chuanxiong Rhizoma	CYCLODODECENE	1501-82-2	637538	C1CCCCCC=CCCCC1
Chuanxiong Rhizoma	cyclohexane,1,1,2,3-tetramethyl-	6783-92-2	57532263	CC1CCCC(C1C)(C)C
Chuanxiong Rhizoma	2,9-Dimethyldecane	1002-17-1	517733	CC(C)CCCCCCC(C)C
Chuanxiong Rhizoma	(2R,4aR)-2-isopropenyl-4a,8-dimethyl-2,3,4,5,6,7-hexahydro-1H-naphthalene	17627-30-4	10899741	CC1=C2CC(CCC2(CCC1)C)C(=C)C
Chuanxiong Rhizoma	1,5,5-trimethyl-6-methylenecyclohexene	514-95-4	578237	CC1=CCCC(C1=C)(C)C
Chuanxiong Rhizoma	Isobutyrophenone	611-70-1	69144	CC(C)C(=O)C1=CC=CC=C1
Chuanxiong Rhizoma	Myricanone	32492-74-3	161748	COC1=C(C(=C2CCCCC(=O)CCC3=CC(=C(C=C3)O)C1=C2)O)OC
Chuanxiong Rhizoma	OCT	31372-91-5	356	CCCCCCCC
Chuanxiong Rhizoma	p-Cymen-8-ol	1197-01-9	14529	CC1=CC=C(C=C1)C(C)(C)O
Chuanxiong Rhizoma	2-PHENYLACETOHYDRAZIDE	114-83-0	8247	CC(=O)NNC1=CC=CC=C1
Chuanxiong Rhizoma	Perlolyrine	29700-20-7	160179	C1=CC=C2C(=C1)C3=C(N2)C(=NC=C3)C4=CC=C(O4)CO
Chuanxiong Rhizoma	pregnenolone	145-13-1	8955	CC(=O)C1CCC2C1(CCC3C2CC=C4C3(CCC(C4)O)C)C
Chuanxiong Rhizoma	sedanoic-acid	6697-07-0	Not Available	Not Available
Chuanxiong Rhizoma	senkyunolide-E	91652-78-7	Not Available	Not Available
Chuanxiong Rhizoma	senkyunolide-F	94530-84-4	Not Available	Not Available
Chuanxiong Rhizoma	senkyunolide-J	94530-86-6	24121290	CCCCC1C2=C(C(C(CC2)O)O)C(=O)O1
Chuanxiong Rhizoma	senkyunolide-L	114586-51-5	Not Available	Not Available
Chuanxiong Rhizoma	1-Acetyl-beta-carboline	50892-83-6	638667	CC(=O)C1=NC=CC2=C1NC3=CC=CC=C23
Chuanxiong Rhizoma	senkyunone	142182-61-4	91726743	CC1=CC(=O)C=C(C1=O)CC=C(C)CCC=C(C)CCC=C(C)C
Chuanxiong Rhizoma	sinapic acid	530-59-6	637775	COC1=CC(=CC(=C1O)OC)C=CC(=O)O
Chuanxiong Rhizoma	trans-2-Nonen-1-ol	22104-79-6	5364941	CCCCCCC=CCO
Chuanxiong Rhizoma	Trimethylamine	75-50-3	1146	CN(C)C
Chuanxiong Rhizoma	wallichilide	93236-64-7	12310596	CC1C(C(CC(O1)OC2CCC3(C(C2)CCC4C3CCC5(C4(CCC5C6=CC(=O)OC6)O)C)C)OC)O
Chuanxiong Rhizoma	1-terpineol	586-82-3	12443330	CC(C)C1=CCC(CC1)(C)O
Chuanxiong Rhizoma	2-Propionylfuran	3194-15-8	76662	CCC(=O)C1=CC=CO1
Chuanxiong Rhizoma	propiophenone	93-55-0	7148	CCC(=O)C1=CC=CC=C1
Chuanxiong Rhizoma	2,2,3-Trimethylcyclopent-3-ene-1-carboxaldehyde	33843-21-9	15764610	CC1=CCC(C1(C)C)C=O
Chuanxiong Rhizoma	methyl 2-pentanoylbenzoate	Not Available	11085323	CCCCC(=O)C1=CC=CC=C1C(=O)OC
Chuanxiong Rhizoma	ISOHEPTANE	591-76-4	11582	CCCCC(C)C
Chuanxiong Rhizoma	Methyl 2-furoate	611-13-2	11902	COC(=O)C1=CC=CO1
Chuanxiong Rhizoma	2-Methyl-1-phenylpropene	768-49-0	13030	CC(=CC1=CC=CC=C1)C
Chuanxiong Rhizoma	(4S,6S)-cis-Carveol	99-48-9	443177	CC1=CCC(CC1O)C(=C)C
Chuanxiong Rhizoma	2-Methylbenzoxazol	95-21-6	7225	CC1=NC2=CC=CC=C2O1
Chuanxiong Rhizoma	(5S,6R)-5,6-dimethyltetrahydropyran-2-one	24405-16-1	11029861	CC1CCC(=O)OC1C
Chuanxiong Rhizoma	3(S)-3-Butyl-4,5-dihydrophthalide	Not Available	14091860	Not Available
Chuanxiong Rhizoma	3-cyclohexen-1-ol	822-66-2	12532693	C1CC(CC=C1)O
Chuanxiong Rhizoma	Methyl 3-furoate	1334-76-5	14918	COC(=O)C1=COC=C1
Chuanxiong Rhizoma	trans-Piperitol	16721-39-4	85568	CC1=CC(C(CC1)C(C)C)O
Chuanxiong Rhizoma	4-iodoindoline	939759-03-2	16244444	C1CNC2=C1C(=CC=C2)I
Chuanxiong Rhizoma	4-Octanone	589-63-9	11516	CCCCC(=O)CCC
Chuanxiong Rhizoma	5-Propyl-2-thiouracil	2954-52-1	3002043	CCCC1=CNC(=S)NC1=O
Chuanxiong Rhizoma	(6R)-6-butylcyclohepta-1,4-diene	33156-91-1	11804943	CCCCC1CC=CCC=C1
Chuanxiong Rhizoma	7-oxabicyclo-2.2.1-heptane,1-methyl-4-[1-methylethyl]-	470-67-7	10106	CC(C)C12CCC(O1)(CC2)C
Chuanxiong Rhizoma	Aromadendrene oxide 2	85710-39-0	16211192	CC1CCC2C1C3C(C3(C)C)CCC24CO4
Chuanxiong Rhizoma	Amylbenzene	27458-20-4	10864	CCCCCC1=CC=CC=C1
Chuanxiong Rhizoma	Dimethyl D-malate	70681-41-3	11062697	COC(=O)CC(C(=O)OC)O
Chuanxiong Rhizoma	3-Butyl-phthalide	6066-49-5	9990075	CCCCC1C2=CC=CC=C2C(=O)O1
Chuanxiong Rhizoma	Cedrene	469-61-4	Not Available	CC1CCC2C13CC=C(C(C3)C2(C)C)C
Chuanxiong Rhizoma	carotol	465-28-1	Not Available	CC1=CCC2(CCC(C2(CC1)O)C(C)C)C
Chuanxiong Rhizoma	Coniferylfcrulate	63644-62-2	Not Available	COC1=C(C=CC(=C1)C=CCOC(=O)C=CC2=CC(=C(C=C2)O)OC)O
Chuanxiong Rhizoma	Cerulignol	2785-87-7	17739	CCCC1=CC(=C(C=C1)O)OC
Chuanxiong Rhizoma	Decahydro-1,6-bis(methylene)-4-(1-methylethyl)-naphthalene	54932-90-0	Not Available	Not Available
Chuanxiong Rhizoma	Hexaphenone	942-92-7	70337	CCCCCC(=O)C1=CC=CC=C1
Chuanxiong Rhizoma	(E,E)-1,3,5-Undecatriene	19883-29-5	5367412	CCCCCC=CC=CC=C
Chuanxiong Rhizoma	Heptan	142-82-5	8900	CCCCCCC
Chuanxiong Rhizoma	L-valyl-L-valinc-achydride	350702-73-7	Not Available	Not Available
Chuanxiong Rhizoma	cis-ligustilide	4431-01-0	5877292	CCCC=C1C2=C(C=CCC2)C(=O)O1
Chuanxiong Rhizoma	tetramethylpyrazine	87396-75-6	14296	CC1=C(N=C(C(=N1)C)C)C
Chuanxiong Rhizoma	METHYL OLEATE	112-62-9	5364509	CCCCCCCCC=CCCCCCCCC(=O)OC
Chuanxiong Rhizoma	LINOLEYL ALCOHOL	506-43-4	5365682	CCCCCC=CCC=CCCCCCCCCO
Chuanxiong Rhizoma	Octatriacontane	7194-85-6	23599	CCCCCCCCCCCCCCCCCCCCCCCCCCCCCCCCCCCCCC
Chuanxiong Rhizoma	(2-amylphenyl)methanol	Not Available	10058085	CCCCCC1=CC=CC=C1CO
Chuanxiong Rhizoma	Senkyunolide A	63038-10-8	3085257	CCCCC1C2=C(C=CCC2)C(=O)O1
Chuanxiong Rhizoma	Senkyunolide G	94530-85-5	5321250	CCCCC1(C2=C(C=CCC2)C(=O)O1)O
Chuanxiong Rhizoma	Germacrene D	23986-74-5	5317570	CC1=CCCC(=C)C=CC(CC1)C(C)C
Chuanxiong Rhizoma	3-Butylidene-phalide	551-08-6	5352899	CCCC=C1C2=CC=CC=C2C(=O)O1
Chuanxiong Rhizoma	Choline	62-49-7	305	C[N+](C)(C)CCO
Chuanxiong Rhizoma	3,4-Dihydroxybenzoic acid	99-50-3	72	C1=CC(=C(C=C1C(=O)O)O)O
Chuanxiong Rhizoma	Ethyl heptadecanoate	14010-23-2	26397	CCCCCCCCCCCCCCCCC(=O)OCC
Chuanxiong Rhizoma	Ethyloctadecanoate	111-61-5	8122	CCCCCCCCCCCCCCCCCC(=O)OCC
Chuanxiong Rhizoma	Ethylpentadecanoate	41114-00-5	Not Available	Not Available
Chuanxiong Rhizoma	Ferulic acid	537-98-4	445858	COC1=C(C=CC(=C1)C=CC(=O)O)O
Chuanxiong Rhizoma	Folic acid	59-30-3	6037	C1=CC(=CC=C1C(=O)NC(CCC(=O)O)C(=O)O)NCC2=CN=C3C(=N2)C(=O)N=C(N3)N
Chuanxiong Rhizoma	Methyl linoleate	112-63-0	5284421	CCCCCC=CCC=CCCCCCCCC(=O)OC
Chuanxiong Rhizoma	Methyl phenylacetate	101-41-7	7559	COC(=O)CC1=CC=CC=C1
Chuanxiong Rhizoma	Neocnidilide	4567-33-3	3083857	CCCCC1C2CCCC=C2C(=O)O1
Chuanxiong Rhizoma	Retinol	68-26-8	445354	CC1=C(C(CCC1)(C)C)C=CC(=CC=CC(=CCO)C)C
Chuanxiong Rhizoma	Senkyunolide H	94596-27-7	5321251	CCCC=C1C2=C(C(C(CC2)O)O)C(=O)O1

## Sheet: Supplemental Information 2
Compounds name	Protein	Uniprot	Score	Interaction	Source
5-HMF	HBA2	Q7Z6G4	0.913	binding	Stitch
5-HMF	HBB	P68871	0.9	binding	Stitch
5-HMF	DCX	O43602	0.8	activation	Stitch
5-HMF	SULT1A1	P50225	0.73	activation	Stitch
5-HMF	SULT1A2	P50226	0.7	activation	Stitch
5-Hydroxymethyl-2-furancarboxylic acid	HBA2	Q7Z6G4	0.913	binding	Stitch
5-Hydroxymethyl-2-furancarboxylic acid	HBA2	Q7Z6G4	0.913	binding	Stitch
5-Hydroxymethyl-2-furancarboxylic acid	HBB	P68871	0.9	binding	Stitch
5-Hydroxymethyl-2-furancarboxylic acid	HBB	P68871	0.9	binding	Stitch
5-Hydroxymethyl-2-furancarboxylic acid	DCX	O43602	0.8	activation	Stitch
5-Hydroxymethyl-2-furancarboxylic acid	DCX	O43602	0.8	activation	Stitch
5-Hydroxymethyl-2-furancarboxylic acid	SULT1A1	P50225	0.73	activation	Stitch
5-Hydroxymethyl-2-furancarboxylic acid	SULT1A1	P50225	0.73	activation	Stitch
5-Hydroxymethyl-2-furancarboxylic acid	SULT1A2	P50226	0.7	activation	Stitch
5-Hydroxymethyl-2-furancarboxylic acid	SULT1A2	P50226	0.7	activation	Stitch
5-oxoproline	P4HA2	O15460	Not Available	unknown	Drugbank
5-oxoproline	PIG6	O43272	Not Available	unknown	Drugbank
5-oxoproline	PIG6	O43272	Not Available	unknown	Drugbank
5-oxoproline	CYP20	O43447	Not Available	unknown	Drugbank
5-oxoproline	HCRT	O43612	Not Available	unknown	Drugbank
5-oxoproline	PROSC	O94903	Not Available	unknown	Drugbank
5-oxoproline	ANG	P03950	Not Available	unknown	Drugbank
5-oxoproline	AMY1	P04745	Not Available	unknown	Drugbank
5-oxoproline	AMY2A	P04746	Not Available	unknown	Drugbank
5-oxoproline	AMY2A	P04746	Not Available	unknown	Drugbank
5-oxoproline	ATP5B	P06576	Not Available	unknown	Drugbank
5-oxoproline	EPRS	P07814	Not Available	unknown	Drugbank
5-oxoproline	IGLC1	P0CG04	Not Available	unknown	Drugbank
5-oxoproline	P4HA	P13674	Not Available	unknown	Drugbank
5-oxoproline	VEGF	P15692	Not Available	unknown	Drugbank
5-oxoproline	AMY2B	P19961	Not Available	unknown	Drugbank
5-oxoproline	CYPB	P23284	Not Available	unknown	Drugbank
5-oxoproline	ATP5A	P25705	Not Available	unknown	Drugbank
5-oxoproline	CYP3	P30405	Not Available	unknown	Drugbank
5-oxoproline	PYCR1	P32322	Not Available	unknown	Drugbank
5-oxoproline	ATP5C	P36542	Not Available	unknown	Drugbank
5-oxoproline	CYPC	P45877	Not Available	unknown	Drugbank
5-oxoproline	GSS	P48637	Not Available	unknown	Drugbank
5-oxoproline	CYPA	P62937	Not Available	unknown	Drugbank
5-oxoproline	CCL8	P80075	Not Available	unknown	Drugbank
5-oxoproline	SML1	Q03403	Not Available	unknown	Drugbank
5-oxoproline	PPIG	Q13427	Not Available	unknown	Drugbank
5-oxoproline	GROS1	Q32P28	Not Available	unknown	Drugbank
5-oxoproline	P5CR2	Q4W8W1	Not Available	unknown	Drugbank
5-oxoproline	PYCRL	Q53H96	Not Available	unknown	Drugbank
5-oxoproline	KAP5.2	Q701N4	Not Available	unknown	Drugbank
5-oxoproline	PARS2	Q7L3T8	Not Available	unknown	Drugbank
5-oxoproline	PAT1	Q7Z2H8	Not Available	unknown	Drugbank
5-oxoproline	LEPREL1	Q8IVL5	Not Available	unknown	Drugbank
5-oxoproline	LEPREL2	Q8IVL6	Not Available	unknown	Drugbank
5-oxoproline	MCT10	Q8TF71	Not Available	unknown	Drugbank
5-oxoproline	PYCR2	Q96C36	Not Available	unknown	Drugbank
5-oxoproline	C14orf149	Q96EM0	Not Available	unknown	Drugbank
5-oxoproline	PROT	Q99884	Not Available	unknown	Drugbank
5-oxoproline	ADAM23	Q9UKQ2	Not Available	unknown	Drugbank
5-oxoproline	SLC6A14	Q9UN76	Not Available	unknown	Drugbank
5-oxoproline	OPLAH	O14841	0.972	catalysis	Stitch
5-oxoproline	GGCT	O75223	0.967	catalysis	Stitch
5-oxoproline	A2LD1	Q9BVM4	0.943	binding	Stitch
5-oxoproline	CCL8	P80075	0.911	binding	Stitch
5-oxoproline	AMY1C	P04745	0.908	binding	Stitch
5-oxoproline	AMY2A	P04746	0.908	binding	Stitch
5-oxoproline	GGT2	P36268	0.907	unknown	Stitch
5-oxoproline	GGT6	Q6P531	0.907	unknown	Stitch
5-oxoproline	GGT7	Q9UJ14	0.907	unknown	Stitch
5-oxoproline	IGHV6-1	A0A0B4J1U7	0.9	binding	Stitch
5-oxoproline	IGKV1-17	A0A0B4J1Z4	0.9	binding	Stitch
5-oxoproline	IGHV2-70	A0A0B4J2H3	0.9	binding	Stitch
5-oxoproline	SIRPB1	O00241	0.9	binding	Stitch
5-oxoproline	IGHG1	P01857	0.9	binding	Stitch
5-oxoproline	IGHM	P01871	0.9	binding	Stitch
5-oxoproline	ORM1	P02763	0.9	binding	Stitch
5-oxoproline	ANG	P03950	0.9	binding	Stitch
5-oxoproline	RLN2	P04090	0.9	binding	Stitch
5-oxoproline	IGLC1	P0CG04	0.9	binding	Stitch
5-oxoproline	IGLC2	P0CG05	0.9	binding	Stitch
5-oxoproline	PIP	P12273	0.9	binding	Stitch
5-oxoproline	AZGP1	P25311	0.9	binding	Stitch
5-oxoproline	IL13	P35225	0.9	binding	Stitch
5-oxoproline	GCLC	P48506	0.9	unknown	Stitch
5-oxoproline	GCLM	P48507	0.9	unknown	Stitch
5-oxoproline	CD47	Q08722	0.9	binding	Stitch
5-oxoproline	MSLN	Q13421	0.9	binding	Stitch
5-oxoproline	IGK@	Q6PJF2	0.9	binding	Stitch
5-oxoproline	ACO2	Q99798	0.836	binding	Stitch
5-oxoproline	IGLL5	B9A064	0.804	binding	Stitch
5-oxoproline	GSS	P48637	0.727	unknown	Stitch
5-oxoproline	QPCT	Q16769	0.623	unknown	Stitch
5-oxoproline	IGKV2-28	A0A075B6P5	0.573	unknown	Stitch
5-oxoproline	IGKV2D-28	A0A075B6P5	0.573	unknown	Stitch
5-oxoproline	IGKV2D-24	A0A075B6R9	0.474	unknown	Stitch
5-oxoproline	IGKV2-30	A0A075B6S3	0.474	unknown	Stitch
5-oxoproline	IGKV2D-30	A0A075B6S6	0.474	unknown	Stitch
5-oxoproline	IGKV2-24	A0A0C4DH68	0.474	unknown	Stitch
5-oxoproline	ALDH18A1	P54886	0.441	binding	Stitch
5-oxoproline	BACE1	P56817	0.423	unknown	Stitch
8-epiloganic acid	CTGF	P29279	0.8	inhibition	Stitch
Acteoside	TGFB1	P01137	0.824	activation	Stitch
Acteoside	CDK2	P24941	0.824	inhibition	Stitch
Acteoside	CDK6	Q00534	0.824	inhibition	Stitch
Acteoside	HMGB1	P09429	0.8	inhibition	Stitch
Acteoside	HMOX1	P09601	0.8	activation	Stitch
Acteoside	TYR	P14679	0.8	inhibition	Stitch
Acteoside	HMG1	Q9NYD7	0.8	inhibition	Stitch
Acteoside	CCNE1	P24864	0.754	inhibition	Stitch
Acteoside	IL8	A0A024RDA5	0.7	expression	Stitch
Acteoside	EGFR	P00533	0.7	unknown	Stitch
Acteoside	CXCL10	P02778	0.7	expression	Stitch
Acteoside	RB1	P06400	0.7	unknown	Stitch
Acteoside	CDK4	P11802	0.7	inhibition	Stitch
Acteoside	CCL2	P13500	0.7	expression	Stitch
Acteoside	MAPK3	P27361	0.7	unknown	Stitch
Acteoside	MAPK1	P28482	0.7	unknown	Stitch
Acteoside	AHR	P35869	0.7	unknown	Stitch
Acteoside	SMAD3	P84022	0.7	unknown	Stitch
Acteoside	SMAD2	Q15796	0.7	unknown	Stitch
Acteoside	NOX1	Q9Y5S8	0.7	inhibition	Stitch
aegineticacid	NR2B2	P28702	Not Available	unknown	Drugbank
aegineticacid	LXRA	Q13133	Not Available	unknown	Drugbank
aegineticacid	BHLHE75	Q15596	Not Available	unknown	Drugbank
Ajugol	AKT1	P31749	0.8	activation	Stitch
Ajugol	GDNF	P39905	0.8	activation	Stitch
arachidic acid	TLR4	O00206	Not Available	unknown	Drugbank
arachidic acid	TLR4	O00206	Not Available	unknown	Drugbank
arachidic acid	BET3	O43617	Not Available	unknown	Drugbank
arachidic acid	BET3	O43617	Not Available	unknown	Drugbank
arachidic acid	GNT1	O60656	Not Available	unknown	Drugbank
arachidic acid	SCN2B	O60939	Not Available	unknown	Drugbank
arachidic acid	DRS1	O75521	Not Available	unknown	Drugbank
arachidic acid	C22orf6	O76054	Not Available	unknown	Drugbank
arachidic acid	OCTN2	O76082	Not Available	unknown	Drugbank
arachidic acid	APOM	O95445	Not Available	unknown	Drugbank
arachidic acid	ABL	P00519	Not Available	unknown	Drugbank
arachidic acid	LALBA	P00709	Not Available	unknown	Drugbank
arachidic acid	PLG	P00747	Not Available	unknown	Drugbank
arachidic acid	PLAT	P00750	Not Available	unknown	Drugbank
arachidic acid	INS	P01308	Not Available	unknown	Drugbank
arachidic acid	IGHG1	P01857	Not Available	unknown	Drugbank
arachidic acid	PMP2	P02689	Not Available	unknown	Drugbank
arachidic acid	ALB	P02768	Not Available	unknown	Drugbank
arachidic acid	ALB	P02768	Not Available	unknown	Drugbank
arachidic acid	ALB	P02768	Not Available	unknown	Drugbank
arachidic acid	PLA2	P04054	Not Available	unknown	Drugbank
arachidic acid	PLA2	P04054	Not Available	unknown	Drugbank
arachidic acid	S100B	P04271	Not Available	unknown	Drugbank
arachidic acid	CYP1A2	P05177	Not Available	unknown	Drugbank
arachidic acid	FABP11	P05413	Not Available	unknown	Drugbank
arachidic acid	FABP11	P05413	Not Available	unknown	Drugbank
arachidic acid	OPN2	P08100	Not Available	unknown	Drugbank
arachidic acid	LPA	P08519	Not Available	unknown	Drugbank
arachidic acid	CYP3A3	P08684	Not Available	unknown	Drugbank
arachidic acid	PAEP	P09466	Not Available	unknown	Drugbank
arachidic acid	PAEP	P09466	Not Available	unknown	Drugbank
arachidic acid	FUR	P09958	Not Available	unknown	Drugbank
arachidic acid	CYP2C8	P10632	Not Available	unknown	Drugbank
arachidic acid	CYP2C8	P10632	Not Available	unknown	Drugbank
arachidic acid	CYP2A3	P11509	Not Available	unknown	Drugbank
arachidic acid	CYP2C10	P11712	Not Available	unknown	Drugbank
arachidic acid	ADH5	P11766	Not Available	unknown	Drugbank
arachidic acid	FABP2	P12104	Not Available	unknown	Drugbank
arachidic acid	FABP2	P12104	Not Available	unknown	Drugbank
arachidic acid	ALAD	P13716	Not Available	unknown	Drugbank
arachidic acid	ALAD	P13716	Not Available	unknown	Drugbank
arachidic acid	ALAD	P13716	Not Available	unknown	Drugbank
arachidic acid	PLA2B	P14555	Not Available	unknown	Drugbank
arachidic acid	TYR	P14679	Not Available	unknown	Drugbank
arachidic acid	FABP4	P15090	Not Available	unknown	Drugbank
arachidic acid	PVR	P15151	Not Available	unknown	Drugbank
arachidic acid	UGT2B7	P16662	Not Available	unknown	Drugbank
arachidic acid	PKACA	P17612	Not Available	unknown	Drugbank
arachidic acid	GM2A	P17900	Not Available	unknown	Drugbank
arachidic acid	GNT1	P19224	Not Available	unknown	Drugbank
arachidic acid	CYP2B6	P20813	Not Available	unknown	Drugbank
arachidic acid	CYP3A5	P20815	Not Available	unknown	Drugbank
arachidic acid	GNT1	P22310	Not Available	unknown	Drugbank
arachidic acid	COX1	P23219	Not Available	unknown	Drugbank
arachidic acid	SRD5A2	P31213	Not Available	unknown	Drugbank
arachidic acid	CYP2C18	P33260	Not Available	unknown	Drugbank
arachidic acid	CYP2C19	P33261	Not Available	unknown	Drugbank
arachidic acid	RCV1	P35243	Not Available	unknown	Drugbank
arachidic acid	NAC1	P35498	Not Available	unknown	Drugbank
arachidic acid	SCN4A	P35499	Not Available	unknown	Drugbank
arachidic acid	GNT1	P35503	Not Available	unknown	Drugbank
arachidic acid	HNF4	P41235	Not Available	unknown	Drugbank
arachidic acid	C6orf131	P43080	Not Available	unknown	Drugbank
arachidic acid	ACADSB	P45954	Not Available	unknown	Drugbank
arachidic acid	PPT	P50897	Not Available	unknown	Drugbank
arachidic acid	ALDH5A1	P51649	Not Available	unknown	Drugbank
arachidic acid	AKR1D1	P51857	Not Available	unknown	Drugbank
arachidic acid	MCT1	P53985	Not Available	unknown	Drugbank
arachidic acid	UGT2B15	P54855	Not Available	unknown	Drugbank
arachidic acid	PKIA	P61925	Not Available	unknown	Drugbank
arachidic acid	CALM	P62158	Not Available	unknown	Drugbank
arachidic acid	ARF6	P62330	Not Available	unknown	Drugbank
arachidic acid	FKBP1	P62942	Not Available	unknown	Drugbank
arachidic acid	CNA2	P63098	Not Available	unknown	Drugbank
arachidic acid	HBB	P68871	Not Available	unknown	Drugbank
arachidic acid	HBA1	P69905	Not Available	unknown	Drugbank
arachidic acid	HNL	P80188	Not Available	unknown	Drugbank
arachidic acid	ABAT	P80404	Not Available	unknown	Drugbank
arachidic acid	ARF1	P84077	Not Available	unknown	Drugbank
arachidic acid	SCN6A	Q01118	Not Available	unknown	Drugbank
arachidic acid	FABP5	Q01469	Not Available	unknown	Drugbank
arachidic acid	OGDH	Q02218	Not Available	unknown	Drugbank
arachidic acid	AO	Q06278	Not Available	unknown	Drugbank
arachidic acid	SCN1B	Q07699	Not Available	unknown	Drugbank
arachidic acid	CALNA	Q08209	Not Available	unknown	Drugbank
arachidic acid	SCN5A	Q14524	Not Available	unknown	Drugbank
arachidic acid	HNF4G	Q14541	Not Available	unknown	Drugbank
arachidic acid	ACOX	Q15067	Not Available	unknown	Drugbank
arachidic acid	BHLHE74	Q15788	Not Available	unknown	Drugbank
arachidic acid	NENA	Q15858	Not Available	unknown	Drugbank
arachidic acid	OAT1	Q4U2R8	Not Available	unknown	Drugbank
arachidic acid	OAT1	Q4U2R8	Not Available	unknown	Drugbank
arachidic acid	SCN4B	Q8IWT1	Not Available	unknown	Drugbank
arachidic acid	OAT3	Q8TCC7	Not Available	unknown	Drugbank
arachidic acid	OAT3	Q8TCC7	Not Available	unknown	Drugbank
arachidic acid	HDAC2	Q92769	Not Available	unknown	Drugbank
arachidic acid	NAC2	Q99250	Not Available	unknown	Drugbank
arachidic acid	GNT1	Q9HAW8	Not Available	unknown	Drugbank
arachidic acid	GNT1	Q9HAW9	Not Available	unknown	Drugbank
arachidic acid	OAT4	Q9NSA0	Not Available	unknown	Drugbank
arachidic acid	KIAA1356	Q9NY46	Not Available	unknown	Drugbank
arachidic acid	KIAA1158	Q9NY72	Not Available	unknown	Drugbank
arachidic acid	GLTP	Q9NZD2	Not Available	unknown	Drugbank
arachidic acid	PLA2G2E	Q9NZK7	Not Available	unknown	Drugbank
arachidic acid	SCN11A	Q9UI33	Not Available	unknown	Drugbank
arachidic acid	GOX1	Q9UJM8	Not Available	unknown	Drugbank
arachidic acid	HDAC7	Q9UKV0	Not Available	unknown	Drugbank
arachidic acid	PLA2G2D	Q9UNK4	Not Available	unknown	Drugbank
arachidic acid	MED	Q9UQD0	Not Available	unknown	Drugbank
arachidic acid	SCN10A	Q9Y5Y9	Not Available	unknown	Drugbank
arachidic acid	NLT	Q9Y694	Not Available	unknown	Drugbank
arachidic acid	ESOP1	Q9Y6Y9	Not Available	unknown	Drugbank
arachidic acid	ESOP1	Q9Y6Y9	Not Available	unknown	Drugbank
arachidic acid	ACOT4	Q8N9L9	0.905	catalysis	Stitch
arachidic acid	ACOT1	Q86TX2	0.904	catalysis	Stitch
arachidic acid	ACOT7	O00154	0.9	catalysis	Stitch
arachidic acid	ACOT2	P49753	0.9	catalysis	Stitch
arachidic acid	LOX	P28300	0.8	activation	Stitch
behenic acid	TLR4	O00206	Not Available	unknown	Drugbank
behenic acid	TLR4	O00206	Not Available	unknown	Drugbank
behenic acid	BET3	O43617	Not Available	unknown	Drugbank
behenic acid	BET3	O43617	Not Available	unknown	Drugbank
behenic acid	GNT1	O60656	Not Available	unknown	Drugbank
behenic acid	SCN2B	O60939	Not Available	unknown	Drugbank
behenic acid	DRS1	O75521	Not Available	unknown	Drugbank
behenic acid	C22orf6	O76054	Not Available	unknown	Drugbank
behenic acid	OCTN2	O76082	Not Available	unknown	Drugbank
behenic acid	APOM	O95445	Not Available	unknown	Drugbank
behenic acid	ABL	P00519	Not Available	unknown	Drugbank
behenic acid	LALBA	P00709	Not Available	unknown	Drugbank
behenic acid	PLG	P00747	Not Available	unknown	Drugbank
behenic acid	PLAT	P00750	Not Available	unknown	Drugbank
behenic acid	INS	P01308	Not Available	unknown	Drugbank
behenic acid	IGHG1	P01857	Not Available	unknown	Drugbank
behenic acid	PMP2	P02689	Not Available	unknown	Drugbank
behenic acid	ALB	P02768	Not Available	unknown	Drugbank
behenic acid	ALB	P02768	Not Available	unknown	Drugbank
behenic acid	ALB	P02768	Not Available	unknown	Drugbank
behenic acid	PLA2	P04054	Not Available	unknown	Drugbank
behenic acid	PLA2	P04054	Not Available	unknown	Drugbank
behenic acid	S100B	P04271	Not Available	unknown	Drugbank
behenic acid	CYP1A2	P05177	Not Available	unknown	Drugbank
behenic acid	FABP11	P05413	Not Available	unknown	Drugbank
behenic acid	FABP11	P05413	Not Available	unknown	Drugbank
behenic acid	OPN2	P08100	Not Available	unknown	Drugbank
behenic acid	LPA	P08519	Not Available	unknown	Drugbank
behenic acid	CYP3A3	P08684	Not Available	unknown	Drugbank
behenic acid	PAEP	P09466	Not Available	unknown	Drugbank
behenic acid	PAEP	P09466	Not Available	unknown	Drugbank
behenic acid	FUR	P09958	Not Available	unknown	Drugbank
behenic acid	CYP2C8	P10632	Not Available	unknown	Drugbank
behenic acid	CYP2C8	P10632	Not Available	unknown	Drugbank
behenic acid	CYP2A3	P11509	Not Available	unknown	Drugbank
behenic acid	CYP2C10	P11712	Not Available	unknown	Drugbank
behenic acid	ADH5	P11766	Not Available	unknown	Drugbank
behenic acid	FABP2	P12104	Not Available	unknown	Drugbank
behenic acid	FABP2	P12104	Not Available	unknown	Drugbank
behenic acid	ALAD	P13716	Not Available	unknown	Drugbank
behenic acid	ALAD	P13716	Not Available	unknown	Drugbank
behenic acid	ALAD	P13716	Not Available	unknown	Drugbank
behenic acid	PLA2B	P14555	Not Available	unknown	Drugbank
behenic acid	TYR	P14679	Not Available	unknown	Drugbank
behenic acid	FABP4	P15090	Not Available	unknown	Drugbank
behenic acid	PVR	P15151	Not Available	unknown	Drugbank
behenic acid	UGT2B7	P16662	Not Available	unknown	Drugbank
behenic acid	PKACA	P17612	Not Available	unknown	Drugbank
behenic acid	GM2A	P17900	Not Available	unknown	Drugbank
behenic acid	GNT1	P19224	Not Available	unknown	Drugbank
behenic acid	CYP2B6	P20813	Not Available	unknown	Drugbank
behenic acid	CYP3A5	P20815	Not Available	unknown	Drugbank
behenic acid	GNT1	P22310	Not Available	unknown	Drugbank
behenic acid	COX1	P23219	Not Available	unknown	Drugbank
behenic acid	SRD5A2	P31213	Not Available	unknown	Drugbank
behenic acid	CYP2C18	P33260	Not Available	unknown	Drugbank
behenic acid	CYP2C19	P33261	Not Available	unknown	Drugbank
behenic acid	RCV1	P35243	Not Available	unknown	Drugbank
behenic acid	NAC1	P35498	Not Available	unknown	Drugbank
behenic acid	SCN4A	P35499	Not Available	unknown	Drugbank
behenic acid	GNT1	P35503	Not Available	unknown	Drugbank
behenic acid	HNF4	P41235	Not Available	unknown	Drugbank
behenic acid	C6orf131	P43080	Not Available	unknown	Drugbank
behenic acid	ACADSB	P45954	Not Available	unknown	Drugbank
behenic acid	PPT	P50897	Not Available	unknown	Drugbank
behenic acid	ALDH5A1	P51649	Not Available	unknown	Drugbank
behenic acid	AKR1D1	P51857	Not Available	unknown	Drugbank
behenic acid	MCT1	P53985	Not Available	unknown	Drugbank
behenic acid	UGT2B15	P54855	Not Available	unknown	Drugbank
behenic acid	PKIA	P61925	Not Available	unknown	Drugbank
behenic acid	CALM	P62158	Not Available	unknown	Drugbank
behenic acid	ARF6	P62330	Not Available	unknown	Drugbank
behenic acid	FKBP1	P62942	Not Available	unknown	Drugbank
behenic acid	CNA2	P63098	Not Available	unknown	Drugbank
behenic acid	HBB	P68871	Not Available	unknown	Drugbank
behenic acid	HBA1	P69905	Not Available	unknown	Drugbank
behenic acid	HNL	P80188	Not Available	unknown	Drugbank
behenic acid	ABAT	P80404	Not Available	unknown	Drugbank
behenic acid	ARF1	P84077	Not Available	unknown	Drugbank
behenic acid	SCN6A	Q01118	Not Available	unknown	Drugbank
behenic acid	FABP5	Q01469	Not Available	unknown	Drugbank
behenic acid	OGDH	Q02218	Not Available	unknown	Drugbank
behenic acid	AO	Q06278	Not Available	unknown	Drugbank
behenic acid	SCN1B	Q07699	Not Available	unknown	Drugbank
behenic acid	CALNA	Q08209	Not Available	unknown	Drugbank
behenic acid	SCN5A	Q14524	Not Available	unknown	Drugbank
behenic acid	HNF4G	Q14541	Not Available	unknown	Drugbank
behenic acid	ACOX	Q15067	Not Available	unknown	Drugbank
behenic acid	BHLHE74	Q15788	Not Available	unknown	Drugbank
behenic acid	NENA	Q15858	Not Available	unknown	Drugbank
behenic acid	OAT1	Q4U2R8	Not Available	unknown	Drugbank
behenic acid	OAT1	Q4U2R8	Not Available	unknown	Drugbank
behenic acid	OAT1	Q4U2R8	Not Available	unknown	Drugbank
behenic acid	SCN4B	Q8IWT1	Not Available	unknown	Drugbank
behenic acid	OAT3	Q8TCC7	Not Available	unknown	Drugbank
behenic acid	OAT3	Q8TCC7	Not Available	unknown	Drugbank
behenic acid	OAT3	Q8TCC7	Not Available	unknown	Drugbank
behenic acid	HDAC2	Q92769	Not Available	unknown	Drugbank
behenic acid	NAC2	Q99250	Not Available	unknown	Drugbank
behenic acid	GNT1	Q9HAW8	Not Available	unknown	Drugbank
behenic acid	GNT1	Q9HAW9	Not Available	unknown	Drugbank
behenic acid	OAT4	Q9NSA0	Not Available	unknown	Drugbank
behenic acid	OAT4	Q9NSA0	Not Available	unknown	Drugbank
behenic acid	KIAA1356	Q9NY46	Not Available	unknown	Drugbank
behenic acid	KIAA1158	Q9NY72	Not Available	unknown	Drugbank
behenic acid	GLTP	Q9NZD2	Not Available	unknown	Drugbank
behenic acid	PLA2G2E	Q9NZK7	Not Available	unknown	Drugbank
behenic acid	SCN11A	Q9UI33	Not Available	unknown	Drugbank
behenic acid	GOX1	Q9UJM8	Not Available	unknown	Drugbank
behenic acid	HDAC7	Q9UKV0	Not Available	unknown	Drugbank
behenic acid	PLA2G2D	Q9UNK4	Not Available	unknown	Drugbank
behenic acid	MED	Q9UQD0	Not Available	unknown	Drugbank
behenic acid	SCN10A	Q9Y5Y9	Not Available	unknown	Drugbank
behenic acid	NLT	Q9Y694	Not Available	unknown	Drugbank
behenic acid	NLT	Q9Y694	Not Available	unknown	Drugbank
behenic acid	ESOP1	Q9Y6Y9	Not Available	unknown	Drugbank
behenic acid	ESOP1	Q9Y6Y9	Not Available	unknown	Drugbank
behenic acid	ABCD1	P33897	0.661	unknown	Stitch
behenic acid	PDLIM7	Q9NR12	0.53	unknown	Stitch
catalpol	AKT1	P31749	0.8	unknown	Stitch
catalpol	GDNF	P39905	0.8	unknown	Stitch
Cis-Caffeic acid/Caffeicacid	ATP5B	P06576	Not Available	unknown	Drugbank
Cis-Caffeic acid/Caffeicacid	GLIF	P14174	Not Available	unknown	Drugbank
Cis-Caffeic acid/Caffeicacid	CTRB	P17538	Not Available	unknown	Drugbank
Cis-Caffeic acid/Caffeicacid	ATP5A	P25705	Not Available	unknown	Drugbank
Cis-Caffeic acid/Caffeicacid	ATP5C	P36542	Not Available	unknown	Drugbank
Cis-Caffeic acid/Caffeicacid	LTB4DH	Q14914	Not Available	unknown	Drugbank
Cis-Caffeic acid/Caffeicacid	OAT3	Q8TCC7	Not Available	unknown	Drugbank
Cistanoside F	TGFB1	P01137	0.824	activation	Stitch
Cistanoside F	CDK2	P24941	0.824	inhibition	Stitch
Cistanoside F	CDK6	Q00534	0.824	inhibition	Stitch
Cistanoside F	TGFB1	P01137	0.824	activation	Stitch
Cistanoside F	CDK2	P24941	0.824	inhibition	Stitch
Cistanoside F	CDK6	Q00534	0.824	inhibition	Stitch
Cistanoside F	HMGB1	P09429	0.8	inhibition	Stitch
Cistanoside F	HMOX1	P09601	0.8	activation	Stitch
Cistanoside F	TYR	P14679	0.8	inhibition	Stitch
Cistanoside F	HMG1	Q9NYD7	0.8	inhibition	Stitch
Cistanoside F	HMGB1	P09429	0.8	inhibition	Stitch
Cistanoside F	HMOX1	P09601	0.8	activation	Stitch
Cistanoside F	TYR	P14679	0.8	inhibition	Stitch
Cistanoside F	HMG1	Q9NYD7	0.8	inhibition	Stitch
Cistanoside F	CCNE1	P24864	0.754	inhibition	Stitch
Cistanoside F	CCNE1	P24864	0.754	inhibition	Stitch
Cistanoside F	IL8	A0A024RDA5	0.7	expression	Stitch
Cistanoside F	EGFR	P00533	0.7	unknown	Stitch
Cistanoside F	CXCL10	P02778	0.7	expression	Stitch
Cistanoside F	RB1	P06400	0.7	unknown	Stitch
Cistanoside F	CDK4	P11802	0.7	inhibition	Stitch
Cistanoside F	CCL2	P13500	0.7	expression	Stitch
Cistanoside F	MAPK3	P27361	0.7	unknown	Stitch
Cistanoside F	MAPK1	P28482	0.7	unknown	Stitch
Cistanoside F	AHR	P35869	0.7	unknown	Stitch
Cistanoside F	SMAD3	P84022	0.7	unknown	Stitch
Cistanoside F	SMAD2	Q15796	0.7	unknown	Stitch
Cistanoside F	NOX1	Q9Y5S8	0.7	inhibition	Stitch
Cistanoside F	IL8	A0A024RDA5	0.7	expression	Stitch
Cistanoside F	EGFR	P00533	0.7	unknown	Stitch
Cistanoside F	CXCL10	P02778	0.7	expression	Stitch
Cistanoside F	RB1	P06400	0.7	unknown	Stitch
Cistanoside F	CDK4	P11802	0.7	inhibition	Stitch
Cistanoside F	CCL2	P13500	0.7	expression	Stitch
Cistanoside F	MAPK3	P27361	0.7	unknown	Stitch
Cistanoside F	MAPK1	P28482	0.7	unknown	Stitch
Cistanoside F	AHR	P35869	0.7	unknown	Stitch
Cistanoside F	SMAD3	P84022	0.7	unknown	Stitch
Cistanoside F	SMAD2	Q15796	0.7	unknown	Stitch
Cistanoside F	NOX1	Q9Y5S8	0.7	inhibition	Stitch
Dihydrocatalpol	ATOX1	O00244	Not Available	unknown	Drugbank
Dihydrocatalpol	SDH4	O14521	Not Available	unknown	Drugbank
Dihydrocatalpol	UQCRQ	O14949	Not Available	unknown	Drugbank
Dihydrocatalpol	COB	P00156	Not Available	unknown	Drugbank
Dihydrocatalpol	AAT	P01009	Not Available	unknown	Drugbank
Dihydrocatalpol	UQCRH	P07919	Not Available	unknown	Drugbank
Dihydrocatalpol	CYC1	P08574	Not Available	unknown	Drugbank
Dihydrocatalpol	NR1B3	P13631	Not Available	unknown	Drugbank
Dihydrocatalpol	UQBP	P14927	Not Available	unknown	Drugbank
Dihydrocatalpol	ABO	P16442	Not Available	unknown	Drugbank
Dihydrocatalpol	ABO	P16442	Not Available	unknown	Drugbank
Dihydrocatalpol	ABO	P16442	Not Available	unknown	Drugbank
Dihydrocatalpol	AMY2B	P19961	Not Available	unknown	Drugbank
Dihydrocatalpol	AMY2B	P19961	Not Available	unknown	Drugbank
Dihydrocatalpol	CYP2B6	P20813	Not Available	unknown	Drugbank
Dihydrocatalpol	SDH	P21912	Not Available	unknown	Drugbank
Dihydrocatalpol	UQCRC2	P22695	Not Available	unknown	Drugbank
Dihydrocatalpol	SDH2	P31040	Not Available	unknown	Drugbank
Dihydrocatalpol	UQCRC1	P31930	Not Available	unknown	Drugbank
Dihydrocatalpol	UQCRFS1	P47985	Not Available	unknown	Drugbank
Dihydrocatalpol	LYZ	P61626	Not Available	unknown	Drugbank
Dihydrocatalpol	FKBP1	P62942	Not Available	unknown	Drugbank
Dihydrocatalpol	ACTA	P68133	Not Available	unknown	Drugbank
Dihydrocatalpol	NR1C2	Q03181	Not Available	unknown	Drugbank
Dihydrocatalpol	ETFDH	Q16134	Not Available	unknown	Drugbank
Dihydrocatalpol	GLT6D1	Q7Z4J2	Not Available	unknown	Drugbank
Dihydrocatalpol	CYB560	Q99643	Not Available	unknown	Drugbank
Dihydrocatalpol	GLTP	Q9NZD2	Not Available	unknown	Drugbank
Dihydrocatalpol	HSPC119	Q9UDW1	Not Available	unknown	Drugbank
Dihydrocatalpol	C22orf28	Q9Y3I0	Not Available	unknown	Drugbank
DL-Methionine	COI	P00395	Not Available	unknown	Drugbank
DL-Methionine	COII	P00403	Not Available	unknown	Drugbank
DL-Methionine	COIII	P00414	Not Available	unknown	Drugbank
DL-Methionine	AT3	P01008	Not Available	unknown	Drugbank
DL-Methionine	MTND1	P03886	Not Available	unknown	Drugbank
DL-Methionine	HLAB	P03989	Not Available	unknown	Drugbank
DL-Methionine	S100B	P04271	Not Available	unknown	Drugbank
DL-Methionine	A4	P05067	Not Available	unknown	Drugbank
DL-Methionine	RIB1	P07998	Not Available	unknown	Drugbank
DL-Methionine	COX6C	P09669	Not Available	unknown	Drugbank
DL-Methionine	UBC	P0CG48	Not Available	unknown	Drugbank
DL-Methionine	COX8	P10176	Not Available	unknown	Drugbank
DL-Methionine	COX5B	P10606	Not Available	unknown	Drugbank
DL-Methionine	COX4	P13073	Not Available	unknown	Drugbank
DL-Methionine	COX6B	P14854	Not Available	unknown	Drugbank
DL-Methionine	GLNS	P15104	Not Available	unknown	Drugbank
DL-Methionine	COX7C	P15954	Not Available	unknown	Drugbank
DL-Methionine	RAB5	P20339	Not Available	unknown	Drugbank
DL-Methionine	COX5A	P20674	Not Available	unknown	Drugbank
DL-Methionine	COX7A1	P24310	Not Available	unknown	Drugbank
DL-Methionine	COX7B	P24311	Not Available	unknown	Drugbank
DL-Methionine	CABP9K	P29377	Not Available	unknown	Drugbank
DL-Methionine	AMS2	P31153	Not Available	unknown	Drugbank
DL-Methionine	MTHFR	P42898	Not Available	unknown	Drugbank
DL-Methionine	METAP2	P50579	Not Available	unknown	Drugbank
DL-Methionine	METAP2	P50579	Not Available	unknown	Drugbank
DL-Methionine	GGTB	P53611	Not Available	unknown	Drugbank
DL-Methionine	MARS	P56192	Not Available	unknown	Drugbank
DL-Methionine	B2M	P61769	Not Available	unknown	Drugbank
DL-Methionine	AMS1	Q00266	Not Available	unknown	Drugbank
DL-Methionine	COX6A	Q02221	Not Available	unknown	Drugbank
DL-Methionine	CLPP	Q16740	Not Available	unknown	Drugbank
DL-Methionine	MCT10	Q8TF71	Not Available	unknown	Drugbank
DL-Methionine	RABGGTA	Q92696	Not Available	unknown	Drugbank
DL-Methionine	BHMT	Q93088	Not Available	unknown	Drugbank
DL-Methionine	BHMT	Q93088	Not Available	unknown	Drugbank
DL-Methionine	MARS2	Q96GW9	Not Available	unknown	Drugbank
DL-Methionine	MTR	Q99707	Not Available	unknown	Drugbank
DL-Methionine	BHMT2	Q9H2M3	Not Available	unknown	Drugbank
DL-Methionine	MAT2B	Q9NZL9	Not Available	unknown	Drugbank
DL-Methionine	HSPC270	Q9NZV6	Not Available	unknown	Drugbank
DL-Methionine	MTRR	Q9UBK8	Not Available	unknown	Drugbank
DL-Methionine	MSRA	Q9UJ68	Not Available	unknown	Drugbank
DL-Methionine	CBS-1	Q9Y3D2	Not Available	unknown	Drugbank
DL-Methionine	MAT1A	Q00266	0.992	catalysis	Stitch
DL-Methionine	MAT2A	P31153	0.99	catalysis	Stitch
DL-Methionine	METAP2	P50579	0.989	binding	Stitch
DL-Methionine	MTHFR	P42898	0.974	inhibition	Stitch
DL-Methionine	MAT2B	Q9NZL9	0.972	catalysis	Stitch
DL-Methionine	MTR	Q99707	0.969	catalysis	Stitch
DL-Methionine	MARS2	Q96GW9	0.964	catalysis	Stitch
DL-Methionine	MARS	P56192	0.959	catalysis	Stitch
DL-Methionine	BHMT	Q93088	0.958	catalysis	Stitch
DL-Methionine	SLC43A2	Q8N370	0.956	catalysis	Stitch
DL-Methionine	LARS	Q9P2J5	0.945	catalysis	Stitch
DL-Methionine	AHCY	P23526	0.944	unknown	Stitch
DL-Methionine	IL4I1	Q96RQ9	0.941	unknown	Stitch
DL-Methionine	COMT	P21964	0.936	unknown	Stitch
DL-Methionine	BHMT2	Q9H2M3	0.93	catalysis	Stitch
DL-Methionine	AIMP1	Q12904	0.929	catalysis	Stitch
DL-Methionine	HLA-B	B0BK84	0.926	catalysis	Stitch
DL-Methionine	SLC7A5	Q01650	0.926	catalysis	Stitch
DL-Methionine	MTHFD1L	Q6UB35	0.925	unknown	Stitch
DL-Methionine	MTHFD1	P11586	0.923	unknown	Stitch
DL-Methionine	CALR	P27797	0.923	unknown	Stitch
DL-Methionine	HLA-A	P30443	0.923	catalysis	Stitch
DL-Methionine	SLC6A15	Q9H2J7	0.92	catalysis	Stitch
DL-Methionine	SOD1	P00441	0.919	binding	Stitch
DL-Methionine	SLC7A8	Q9UHI5	0.919	catalysis	Stitch
DL-Methionine	HLA-B*40	O19643	0.918	catalysis	Stitch
DL-Methionine	SLC43A1	O75387	0.918	catalysis	Stitch
DL-Methionine	SLC6A19	Q695T7	0.918	catalysis	Stitch
DL-Methionine	TAT	P17735	0.917	unknown	Stitch
DL-Methionine	SEC61A1	P61619	0.917	unknown	Stitch
DL-Methionine	SLC3A2	P08195	0.915	catalysis	Stitch
DL-Methionine	CTSS	P25774	0.915	catalysis	Stitch
DL-Methionine	IARS	P41252	0.915	catalysis	Stitch
DL-Methionine	HBA2	Q7Z6G4	0.915	binding	Stitch
DL-Methionine	GOT1	P17174	0.914	catalysis	Stitch
DL-Methionine	PSMD4	P55036	0.914	catalysis	Stitch
DL-Methionine	SLC6A18	Q96N87	0.914	catalysis	Stitch
DL-Methionine	SLC6A14	Q9UN76	0.914	catalysis	Stitch
DL-Methionine	B*15	O19550	0.913	catalysis	Stitch
DL-Methionine	RARS	P54136	0.913	catalysis	Stitch
DL-Methionine	OPLAH	O14841	0.912	unknown	Stitch
DL-Methionine	HLA-B41	Q29674	0.912	catalysis	Stitch
DL-Methionine	HLA-B57	Q9MYI6	0.912	catalysis	Stitch
DL-Methionine	HLA-ABC	O19689	0.911	catalysis	Stitch
DL-Methionine	VEGFA	P15692	0.911	binding	Stitch
DL-Methionine	QARS	P47897	0.911	catalysis	Stitch
DL-Methionine	UBA52	P62987	0.911	reaction	Stitch
DL-Methionine	ADI1	Q9BV57	0.911	unknown	Stitch
DL-Methionine	HLAC	Q9MY34	0.911	catalysis	Stitch
DL-Methionine	DAO	P14920	0.91	inhibition	Stitch
DL-Methionine	DMGDH	Q9UI17	0.91	unknown	Stitch
DL-Methionine	PSMB11	A5LHX3	0.909	catalysis	Stitch
DL-Methionine	B-3501	O19626	0.909	catalysis	Stitch
DL-Methionine	PSMB5	P28074	0.909	catalysis	Stitch
DL-Methionine	PDIA3	P30101	0.909	unknown	Stitch
DL-Methionine	HLA-C	P30499	0.909	catalysis	Stitch
DL-Methionine	HBB	P68871	0.909	binding	Stitch
DL-Methionine	FOLH1	Q04609	0.909	binding	Stitch
DL-Methionine	KARS	Q15046	0.909	catalysis	Stitch
DL-Methionine	LNPEP	Q9UIQ6	0.909	catalysis	Stitch
DL-Methionine	SARDH	Q9UL12	0.909	unknown	Stitch
DL-Methionine	LIPT1	Q9Y234	0.909	unknown	Stitch
DL-Methionine	LIAS	O43766	0.908	catalysis	Stitch
DL-Methionine	UBB	P0CG47	0.908	reaction	Stitch
DL-Methionine	B2M	P61769	0.908	catalysis	Stitch
DL-Methionine	ERAP1	Q9NZ08	0.908	catalysis	Stitch
DL-Methionine	EPRS	P07814	0.907	catalysis	Stitch
DL-Methionine	PSMB1	P20618	0.907	catalysis	Stitch
DL-Methionine	PSMA5	P28066	0.907	catalysis	Stitch
DL-Methionine	PSMB4	P28070	0.907	catalysis	Stitch
DL-Methionine	PSMB2	P49721	0.907	catalysis	Stitch
DL-Methionine	PSME3	P61289	0.907	catalysis	Stitch
DL-Methionine	SLC38A1	Q9H2H9	0.907	catalysis	Stitch
DL-Methionine	PSMC2	P35998	0.906	catalysis	Stitch
DL-Methionine	PSMB10	P40306	0.906	catalysis	Stitch
DL-Methionine	SEC61G	P60059	0.906	unknown	Stitch
DL-Methionine	SEC61B	P60468	0.906	unknown	Stitch
DL-Methionine	RPS27A	P62979	0.906	reaction	Stitch
DL-Methionine	SLC38A2	Q96QD8	0.906	catalysis	Stitch
DL-Methionine	PSMB7	Q99436	0.906	catalysis	Stitch
DL-Methionine	PSMC5	P62195	0.905	catalysis	Stitch
DL-Methionine	PSMC6	P62333	0.905	catalysis	Stitch
DL-Methionine	PSMC3	P17980	0.904	catalysis	Stitch
DL-Methionine	PSMC4	P43686	0.904	catalysis	Stitch
DL-Methionine	PSMC1	P62191	0.904	catalysis	Stitch
DL-Methionine	CNDP2	Q96KP4	0.904	unknown	Stitch
DL-Methionine	PSMD14	O00487	0.903	catalysis	Stitch
DL-Methionine	BLMH	Q13867	0.903	catalysis	Stitch
DL-Methionine	PSMD11	O00231	0.9	catalysis	Stitch
DL-Methionine	PSMD12	O00232	0.9	catalysis	Stitch
DL-Methionine	PSMD9	O00233	0.9	catalysis	Stitch
DL-Methionine	PSMA7	O14818	0.9	catalysis	Stitch
DL-Methionine	PSMD3	O43242	0.9	catalysis	Stitch
DL-Methionine	AIMP3	O43324	0.9	catalysis	Stitch
DL-Methionine	GGCT	O75223	0.9	catalysis	Stitch
DL-Methionine	PSMD10	O75832	0.9	catalysis	Stitch
DL-Methionine	MOCS2	O96033	0.9	unknown	Stitch
DL-Methionine	UBC	P0CG48	0.9	reaction	Stitch
DL-Methionine	DARS	P14868	0.9	catalysis	Stitch
DL-Methionine	PSMA1	P25786	0.9	catalysis	Stitch
DL-Methionine	PSMA2	P25787	0.9	catalysis	Stitch
DL-Methionine	PSMA3	P25788	0.9	catalysis	Stitch
DL-Methionine	PSMA4	P25789	0.9	catalysis	Stitch
DL-Methionine	PSMB6	P28072	0.9	catalysis	Stitch
DL-Methionine	TPP2	P29144	0.9	catalysis	Stitch
DL-Methionine	NNMT	P40261	0.9	unknown	Stitch
DL-Methionine	PSMD8	P48556	0.9	catalysis	Stitch
DL-Methionine	PSMB3	P49720	0.9	catalysis	Stitch
DL-Methionine	TPMT	P51580	0.9	unknown	Stitch
DL-Methionine	PSMD7	P51665	0.9	catalysis	Stitch
DL-Methionine	NPEPPS	P55786	0.9	catalysis	Stitch
DL-Methionine	PSMA6	P60900	0.9	catalysis	Stitch
DL-Methionine	PSME1	Q06323	0.9	catalysis	Stitch
DL-Methionine	AIMP2	Q13155	0.9	catalysis	Stitch
DL-Methionine	PSMD2	Q13200	0.9	catalysis	Stitch
DL-Methionine	PSME4	Q14997	0.9	catalysis	Stitch
DL-Methionine	PSMD6	Q15008	0.9	catalysis	Stitch
DL-Methionine	PSMD5	Q16401	0.9	catalysis	Stitch
DL-Methionine	Cw	Q1G0L6	0.9	catalysis	Stitch
DL-Methionine	ERAP2	Q6P179	0.9	catalysis	Stitch
DL-Methionine	HLC-C	Q860A5	0.9	catalysis	Stitch
DL-Methionine	PSMA8	Q8TAA3	0.9	catalysis	Stitch
DL-Methionine	PSMF1	Q92530	0.9	catalysis	Stitch
DL-Methionine	PSMD1	Q99460	0.9	catalysis	Stitch
DL-Methionine	SEC61A2	Q9H9S3	0.9	unknown	Stitch
DL-Methionine	PSME2	Q9UL46	0.9	catalysis	Stitch
DL-Methionine	PSMD13	Q9UNM6	0.9	catalysis	Stitch
DL-Methionine	MSRA	Q9UJ68	0.899	catalysis	Stitch
DL-Methionine	GLUL	P15104	0.896	inhibition	Stitch
DL-Methionine	MTRR	Q9UBK8	0.876	binding	Stitch
DL-Methionine	RELN	P78509	0.853	inhibition	Stitch
DL-Methionine	MSRB2	Q9Y3D2	0.848	catalysis	Stitch
DL-Methionine	CCND1	P24385	0.841	unknown	Stitch
DL-Methionine	CTH	P32929	0.841	activation	Stitch
DL-Methionine	SEPX1	D3DU81	0.82	catalysis	Stitch
DL-Methionine	HMOX1	P09601	0.816	activation	Stitch
DL-Methionine	SLC16A10	Q8TF71	0.813	inhibition	Stitch
DL-Methionine	CBS	P35520	0.77	unknown	Stitch
DL-Methionine	SMUG1	Q53HV7	0.725	unknown	Stitch
DL-Methionine	CSN1S1	P47710	0.718	unknown	Stitch
DL-Methionine	ALB	P02768	0.667	unknown	Stitch
DL-Methionine	AVIL	O75366	0.653	binding	Stitch
DL-Methionine	VIL1	P09327	0.653	binding	Stitch
DL-Methionine	TSPO	P30536	0.636	unknown	Stitch
DL-Methionine	HNMT	P50135	0.569	unknown	Stitch
DL-Methionine	INS	P01308	0.53	unknown	Stitch
DL-Methionine	METAP1	P53582	0.519	unknown	Stitch
DL-Methionine	CAT	P04040	0.515	unknown	Stitch
DL-Methionine	GSN	P06396	0.506	unknown	Stitch
DL-Methionine	EIF2S1	P05198	0.499	binding	Stitch
DL-Methionine	LYZ	P61626	0.496	unknown	Stitch
DL-Methionine	ADCY10	Q96PN6	0.487	unknown	Stitch
DL-Methionine	ALPP	P05187	0.486	unknown	Stitch
DL-Methionine	ALPPL2	P10696	0.486	unknown	Stitch
DL-Methionine	ALPL	P05186	0.485	unknown	Stitch
DL-Methionine	FBL	P22087	0.481	binding	Stitch
DL-Methionine	TYR	P14679	0.48	unknown	Stitch
DL-Methionine	MOCS1	Q9NZB8	0.473	binding	Stitch
DL-Methionine	SCIN	Q9Y6U3	0.472	unknown	Stitch
DL-Methionine	PRNP	F7VJQ1	0.466	unknown	Stitch
DL-Methionine	GDA	Q9Y2T3	0.465	binding	Stitch
DL-Methionine	CLPB	Q9H078	0.455	unknown	Stitch
DL-Methionine	ATP5H	O75947	0.451	unknown	Stitch
DL-Methionine	EIF5	P55010	0.45	binding	Stitch
DL-Methionine	SHMT2	P34897	0.449	unknown	Stitch
DL-Methionine	RNMT	O43148	0.444	unknown	Stitch
DL-Methionine	GAPDH	P04406	0.442	unknown	Stitch
DL-Methionine	TFRC	P02786	0.432	unknown	Stitch
DL-Methionine	RNASE1	P07998	0.432	unknown	Stitch
DL-Methionine	FBLL1	A6NHQ2	0.429	binding	Stitch
DL-Methionine	C1QTNF5	Q9BXJ0	0.426	unknown	Stitch
DL-Methionine	MGAM	O43451	0.421	unknown	Stitch
DL-Methionine	ANGEL2	Q5VTE6	0.417	unknown	Stitch
DL-Methionine	PYGB	P11216	0.411	unknown	Stitch
DL-Methionine	ITGA2	P17301	0.411	unknown	Stitch
DL-Methionine	PYGL	P06737	0.41	unknown	Stitch
DL-Methionine	PYGM	P11217	0.41	unknown	Stitch
DL-Methionine	ZNF79	Q15937	0.41	unknown	Stitch
DL-Methionine	LARS2	Q15031	0.407	binding	Stitch
DL-Methionine	EIF2S3	P41091	0.4	binding	Stitch
D-mannitol	CDIPT	O14735	Not Available	unknown	Drugbank
D-mannitol	GBA	P04062	Not Available	unknown	Drugbank
D-mannitol	OPN2	P08100	Not Available	unknown	Drugbank
D-mannitol	ODC1	P11926	0.882	inhibition	Stitch
D-mannitol	NOS1	P29475	0.871	binding	Stitch
D-mannitol	NPPA	P01160	0.852	activation	Stitch
D-mannitol	AKR1B1	P15121	0.835	activation	Stitch
D-mannitol	REN	P00797	0.833	inhibition	Stitch
D-mannitol	AQP4	P55087	0.831	activation	Stitch
D-mannitol	LEP	P41159	0.82	activation	Stitch
D-mannitol	ICAM1	P05362	0.819	activation	Stitch
D-mannitol	SRC	P12931	0.819	activation	Stitch
D-mannitol	TGFB1	P01137	0.818	activation	Stitch
D-mannitol	SERPINE1	P05121	0.813	activation	Stitch
D-mannitol	DUSP1	P28562	0.8	activation	Stitch
D-mannitol	EHHADH	Q08426	0.8	activation	Stitch
D-mannitol	KCNT2	Q6UVM3	0.8	inhibition	Stitch
D-mannitol	CASP3	P42574	0.77	activation	Stitch
D-mannitol	NOS2	P35228	0.725	unknown	Stitch
D-mannitol	CAT	P04040	0.724	unknown	Stitch
D-mannitol	GABRB3	P28472	0.719	activation	Stitch
D-mannitol	ADORA1	P30542	0.719	activation	Stitch
D-mannitol	PTK2	Q05397	0.714	unknown	Stitch
D-mannitol	CASP9	P55211	0.7	activation	Stitch
D-mannitol	NOS3	P29474	0.512	unknown	Stitch
D-mannitol	GUSB	P08236	0.437	unknown	Stitch
D-mannitol	ALB	P02768	0.429	unknown	Stitch
D-mannitol	CSN1S1	P47710	0.426	unknown	Stitch
Echinacoside	PRKCA	P17252	0.645	binding	Stitch
Echinacoside	PRKCA	P17252	0.645	binding	Stitch
Echinacoside	PRKCB	P05771	0.453	binding	Stitch
Echinacoside	PRKCB	P05771	0.453	binding	Stitch
Echinacoside	AKR1B1	P15121	0.414	binding	Stitch
Echinacoside	AKR1B1	P15121	0.414	binding	Stitch
Ferulic acid	GLIF	P14174	Not Available	unknown	Drugbank
Ferulic acid	LTB4DH	Q14914	Not Available	unknown	Drugbank
Ferulic acid	ABCG1	P45844	0.81	activation	Stitch
Ferulic acid	NOS1	P29475	0.733	inhibition	Stitch
Ferulic acid	TYR	P14679	0.729	unknown	Stitch
Ferulic acid	UGT1A7	Q9HAW7	0.71	unknown	Stitch
Ferulic acid	UGT1A10	Q9HAW8	0.71	unknown	Stitch
Ferulic acid	UGT1A8	Q9HAW9	0.71	unknown	Stitch
Ferulic acid	CYP1A1	P04798	0.7	inhibition	Stitch
Ferulic acid	CYP1A2	P05177	0.7	inhibition	Stitch
Ferulic acid	RB1	P06400	0.7	unknown	Stitch
Ferulic acid	MAPK3	P27361	0.7	inhibition	Stitch
Ferulic acid	MAPK1	P28482	0.7	inhibition	Stitch
Ferulic acid	CA2	P00918	0.505	binding	Stitch
Ferulic acid	CA1	P00915	0.485	binding	Stitch
Ferulic acid	ERVWE1	D0EYG5	0.448	unknown	Stitch
Forsythiaside	PRKCA	P17252	0.429	binding	Stitch
Geniposide	GLP1R	P43220	0.827	activation	Stitch
Geniposide	GLP1R	P43220	0.827	activation	Stitch
Geniposide	CYP2E1	P05181	0.8	inhibition	Stitch
Geniposide	IL6	P05231	0.8	inhibition	Stitch
Geniposide	HMOX1	P09601	0.8	activation	Stitch
Geniposide	CYP2E1	P05181	0.8	inhibition	Stitch
Geniposide	IL6	P05231	0.8	inhibition	Stitch
Geniposide	HMOX1	P09601	0.8	activation	Stitch
heneicosanoic acid	TLR4	O00206	Not Available	unknown	Drugbank
heneicosanoic acid	TLR4	O00206	Not Available	unknown	Drugbank
heneicosanoic acid	BET3	O43617	Not Available	unknown	Drugbank
heneicosanoic acid	BET3	O43617	Not Available	unknown	Drugbank
heneicosanoic acid	GNT1	O60656	Not Available	unknown	Drugbank
heneicosanoic acid	SCN2B	O60939	Not Available	unknown	Drugbank
heneicosanoic acid	DRS1	O75521	Not Available	unknown	Drugbank
heneicosanoic acid	C22orf6	O76054	Not Available	unknown	Drugbank
heneicosanoic acid	OCTN2	O76082	Not Available	unknown	Drugbank
heneicosanoic acid	APOM	O95445	Not Available	unknown	Drugbank
heneicosanoic acid	ABL	P00519	Not Available	unknown	Drugbank
heneicosanoic acid	LALBA	P00709	Not Available	unknown	Drugbank
heneicosanoic acid	PLG	P00747	Not Available	unknown	Drugbank
heneicosanoic acid	PLAT	P00750	Not Available	unknown	Drugbank
heneicosanoic acid	INS	P01308	Not Available	unknown	Drugbank
heneicosanoic acid	IGHG1	P01857	Not Available	unknown	Drugbank
heneicosanoic acid	PMP2	P02689	Not Available	unknown	Drugbank
heneicosanoic acid	ALB	P02768	Not Available	unknown	Drugbank
heneicosanoic acid	ALB	P02768	Not Available	unknown	Drugbank
heneicosanoic acid	ALB	P02768	Not Available	unknown	Drugbank
heneicosanoic acid	PLA2	P04054	Not Available	unknown	Drugbank
heneicosanoic acid	PLA2	P04054	Not Available	unknown	Drugbank
heneicosanoic acid	S100B	P04271	Not Available	unknown	Drugbank
heneicosanoic acid	CYP1A2	P05177	Not Available	unknown	Drugbank
heneicosanoic acid	FABP11	P05413	Not Available	unknown	Drugbank
heneicosanoic acid	FABP11	P05413	Not Available	unknown	Drugbank
heneicosanoic acid	OPN2	P08100	Not Available	unknown	Drugbank
heneicosanoic acid	LPA	P08519	Not Available	unknown	Drugbank
heneicosanoic acid	CYP3A3	P08684	Not Available	unknown	Drugbank
heneicosanoic acid	PAEP	P09466	Not Available	unknown	Drugbank
heneicosanoic acid	PAEP	P09466	Not Available	unknown	Drugbank
heneicosanoic acid	FUR	P09958	Not Available	unknown	Drugbank
heneicosanoic acid	CYP2C8	P10632	Not Available	unknown	Drugbank
heneicosanoic acid	CYP2C8	P10632	Not Available	unknown	Drugbank
heneicosanoic acid	CYP2A3	P11509	Not Available	unknown	Drugbank
heneicosanoic acid	CYP2C10	P11712	Not Available	unknown	Drugbank
heneicosanoic acid	ADH5	P11766	Not Available	unknown	Drugbank
heneicosanoic acid	FABP2	P12104	Not Available	unknown	Drugbank
heneicosanoic acid	FABP2	P12104	Not Available	unknown	Drugbank
heneicosanoic acid	ALAD	P13716	Not Available	unknown	Drugbank
heneicosanoic acid	ALAD	P13716	Not Available	unknown	Drugbank
heneicosanoic acid	ALAD	P13716	Not Available	unknown	Drugbank
heneicosanoic acid	PLA2B	P14555	Not Available	unknown	Drugbank
heneicosanoic acid	TYR	P14679	Not Available	unknown	Drugbank
heneicosanoic acid	FABP4	P15090	Not Available	unknown	Drugbank
heneicosanoic acid	PVR	P15151	Not Available	unknown	Drugbank
heneicosanoic acid	UGT2B7	P16662	Not Available	unknown	Drugbank
heneicosanoic acid	PKACA	P17612	Not Available	unknown	Drugbank
heneicosanoic acid	GM2A	P17900	Not Available	unknown	Drugbank
heneicosanoic acid	GNT1	P19224	Not Available	unknown	Drugbank
heneicosanoic acid	CYP2B6	P20813	Not Available	unknown	Drugbank
heneicosanoic acid	CYP3A5	P20815	Not Available	unknown	Drugbank
heneicosanoic acid	GNT1	P22310	Not Available	unknown	Drugbank
heneicosanoic acid	COX1	P23219	Not Available	unknown	Drugbank
heneicosanoic acid	SRD5A2	P31213	Not Available	unknown	Drugbank
heneicosanoic acid	CYP2C18	P33260	Not Available	unknown	Drugbank
heneicosanoic acid	CYP2C19	P33261	Not Available	unknown	Drugbank
heneicosanoic acid	RCV1	P35243	Not Available	unknown	Drugbank
heneicosanoic acid	NAC1	P35498	Not Available	unknown	Drugbank
heneicosanoic acid	SCN4A	P35499	Not Available	unknown	Drugbank
heneicosanoic acid	GNT1	P35503	Not Available	unknown	Drugbank
heneicosanoic acid	HNF4	P41235	Not Available	unknown	Drugbank
heneicosanoic acid	C6orf131	P43080	Not Available	unknown	Drugbank
heneicosanoic acid	ACADSB	P45954	Not Available	unknown	Drugbank
heneicosanoic acid	PPT	P50897	Not Available	unknown	Drugbank
heneicosanoic acid	ALDH5A1	P51649	Not Available	unknown	Drugbank
heneicosanoic acid	AKR1D1	P51857	Not Available	unknown	Drugbank
heneicosanoic acid	MCT1	P53985	Not Available	unknown	Drugbank
heneicosanoic acid	UGT2B15	P54855	Not Available	unknown	Drugbank
heneicosanoic acid	PKIA	P61925	Not Available	unknown	Drugbank
heneicosanoic acid	CALM	P62158	Not Available	unknown	Drugbank
heneicosanoic acid	ARF6	P62330	Not Available	unknown	Drugbank
heneicosanoic acid	FKBP1	P62942	Not Available	unknown	Drugbank
heneicosanoic acid	CNA2	P63098	Not Available	unknown	Drugbank
heneicosanoic acid	HBB	P68871	Not Available	unknown	Drugbank
heneicosanoic acid	HBA1	P69905	Not Available	unknown	Drugbank
heneicosanoic acid	HNL	P80188	Not Available	unknown	Drugbank
heneicosanoic acid	ABAT	P80404	Not Available	unknown	Drugbank
heneicosanoic acid	ARF1	P84077	Not Available	unknown	Drugbank
heneicosanoic acid	SCN6A	Q01118	Not Available	unknown	Drugbank
heneicosanoic acid	FABP5	Q01469	Not Available	unknown	Drugbank
heneicosanoic acid	OGDH	Q02218	Not Available	unknown	Drugbank
heneicosanoic acid	AO	Q06278	Not Available	unknown	Drugbank
heneicosanoic acid	SCN1B	Q07699	Not Available	unknown	Drugbank
heneicosanoic acid	CALNA	Q08209	Not Available	unknown	Drugbank
heneicosanoic acid	SCN5A	Q14524	Not Available	unknown	Drugbank
heneicosanoic acid	HNF4G	Q14541	Not Available	unknown	Drugbank
heneicosanoic acid	ACOX	Q15067	Not Available	unknown	Drugbank
heneicosanoic acid	BHLHE74	Q15788	Not Available	unknown	Drugbank
heneicosanoic acid	NENA	Q15858	Not Available	unknown	Drugbank
heneicosanoic acid	OAT1	Q4U2R8	Not Available	unknown	Drugbank
heneicosanoic acid	OAT1	Q4U2R8	Not Available	unknown	Drugbank
heneicosanoic acid	SCN4B	Q8IWT1	Not Available	unknown	Drugbank
heneicosanoic acid	OAT3	Q8TCC7	Not Available	unknown	Drugbank
heneicosanoic acid	OAT3	Q8TCC7	Not Available	unknown	Drugbank
heneicosanoic acid	HDAC2	Q92769	Not Available	unknown	Drugbank
heneicosanoic acid	NAC2	Q99250	Not Available	unknown	Drugbank
heneicosanoic acid	GNT1	Q9HAW8	Not Available	unknown	Drugbank
heneicosanoic acid	GNT1	Q9HAW9	Not Available	unknown	Drugbank
heneicosanoic acid	OAT4	Q9NSA0	Not Available	unknown	Drugbank
heneicosanoic acid	KIAA1356	Q9NY46	Not Available	unknown	Drugbank
heneicosanoic acid	KIAA1158	Q9NY72	Not Available	unknown	Drugbank
heneicosanoic acid	GLTP	Q9NZD2	Not Available	unknown	Drugbank
heneicosanoic acid	PLA2G2E	Q9NZK7	Not Available	unknown	Drugbank
heneicosanoic acid	SCN11A	Q9UI33	Not Available	unknown	Drugbank
heneicosanoic acid	GOX1	Q9UJM8	Not Available	unknown	Drugbank
heneicosanoic acid	HDAC7	Q9UKV0	Not Available	unknown	Drugbank
heneicosanoic acid	PLA2G2D	Q9UNK4	Not Available	unknown	Drugbank
heneicosanoic acid	MED	Q9UQD0	Not Available	unknown	Drugbank
heneicosanoic acid	SCN10A	Q9Y5Y9	Not Available	unknown	Drugbank
heneicosanoic acid	NLT	Q9Y694	Not Available	unknown	Drugbank
heneicosanoic acid	ESOP1	Q9Y6Y9	Not Available	unknown	Drugbank
heneicosanoic acid	ESOP1	Q9Y6Y9	Not Available	unknown	Drugbank
isoacteoside	AKR1B1	P15121	0.447	binding	Stitch
jioglutin C	ATOX1	O00244	Not Available	unknown	Drugbank
jioglutin C	AAT	P01009	Not Available	unknown	Drugbank
jioglutin C	CYP2B6	P20813	Not Available	unknown	Drugbank
jioglutin C	LYZ	P61626	Not Available	unknown	Drugbank
jioglutin C	ACTA	P68133	Not Available	unknown	Drugbank
jioglutin C	C22orf28	Q9Y3I0	Not Available	unknown	Drugbank
jioglutolide	IGHG2	P01859	Not Available	unknown	Drugbank
jioglutolide	AR	P10275	Not Available	unknown	Drugbank
Jioglutoside A	AKT1	P31749	0.8	activation	Stitch
Jioglutoside A	GDNF	P39905	0.8	activation	Stitch
Jionoside A1	AKR1B1	P15121	0.414	binding	Stitch
Jionoside B	AKR1B1	P15121	0.414	binding	Stitch
Jionoside B1	AKR1B1	P15121	0.414	binding	Stitch
Lauric acid	TLR4	O00206	Not Available	unknown	Drugbank
Lauric acid	TLR4	O00206	Not Available	unknown	Drugbank
Lauric acid	BET3	O43617	Not Available	unknown	Drugbank
Lauric acid	BET3	O43617	Not Available	unknown	Drugbank
Lauric acid	GNT1	O60656	Not Available	unknown	Drugbank
Lauric acid	SCN2B	O60939	Not Available	unknown	Drugbank
Lauric acid	DRS1	O75521	Not Available	unknown	Drugbank
Lauric acid	C22orf6	O76054	Not Available	unknown	Drugbank
Lauric acid	OCTN2	O76082	Not Available	unknown	Drugbank
Lauric acid	APOM	O95445	Not Available	unknown	Drugbank
Lauric acid	ABL	P00519	Not Available	unknown	Drugbank
Lauric acid	LALBA	P00709	Not Available	unknown	Drugbank
Lauric acid	PLG	P00747	Not Available	unknown	Drugbank
Lauric acid	PLAT	P00750	Not Available	unknown	Drugbank
Lauric acid	INS	P01308	Not Available	unknown	Drugbank
Lauric acid	IGHG1	P01857	Not Available	unknown	Drugbank
Lauric acid	PMP2	P02689	Not Available	unknown	Drugbank
Lauric acid	ALB	P02768	Not Available	unknown	Drugbank
Lauric acid	ALB	P02768	Not Available	unknown	Drugbank
Lauric acid	ALB	P02768	Not Available	unknown	Drugbank
Lauric acid	PLA2	P04054	Not Available	unknown	Drugbank
Lauric acid	PLA2	P04054	Not Available	unknown	Drugbank
Lauric acid	S100B	P04271	Not Available	unknown	Drugbank
Lauric acid	CYP1A2	P05177	Not Available	unknown	Drugbank
Lauric acid	FABP11	P05413	Not Available	unknown	Drugbank
Lauric acid	FABP11	P05413	Not Available	unknown	Drugbank
Lauric acid	OPN2	P08100	Not Available	unknown	Drugbank
Lauric acid	LPA	P08519	Not Available	unknown	Drugbank
Lauric acid	CYP3A3	P08684	Not Available	unknown	Drugbank
Lauric acid	PAEP	P09466	Not Available	unknown	Drugbank
Lauric acid	PAEP	P09466	Not Available	unknown	Drugbank
Lauric acid	FUR	P09958	Not Available	unknown	Drugbank
Lauric acid	CYP2C8	P10632	Not Available	unknown	Drugbank
Lauric acid	CYP2C8	P10632	Not Available	unknown	Drugbank
Lauric acid	CYP2A3	P11509	Not Available	unknown	Drugbank
Lauric acid	CYP2C10	P11712	Not Available	unknown	Drugbank
Lauric acid	ADH5	P11766	Not Available	unknown	Drugbank
Lauric acid	FABP2	P12104	Not Available	unknown	Drugbank
Lauric acid	FABP2	P12104	Not Available	unknown	Drugbank
Lauric acid	ALAD	P13716	Not Available	unknown	Drugbank
Lauric acid	ALAD	P13716	Not Available	unknown	Drugbank
Lauric acid	ALAD	P13716	Not Available	unknown	Drugbank
Lauric acid	PLA2B	P14555	Not Available	unknown	Drugbank
Lauric acid	TYR	P14679	Not Available	unknown	Drugbank
Lauric acid	FABP4	P15090	Not Available	unknown	Drugbank
Lauric acid	PVR	P15151	Not Available	unknown	Drugbank
Lauric acid	UGT2B7	P16662	Not Available	unknown	Drugbank
Lauric acid	PKACA	P17612	Not Available	unknown	Drugbank
Lauric acid	GM2A	P17900	Not Available	unknown	Drugbank
Lauric acid	GNT1	P19224	Not Available	unknown	Drugbank
Lauric acid	CYP2B6	P20813	Not Available	unknown	Drugbank
Lauric acid	CYP3A5	P20815	Not Available	unknown	Drugbank
Lauric acid	GNT1	P22310	Not Available	unknown	Drugbank
Lauric acid	COX1	P23219	Not Available	unknown	Drugbank
Lauric acid	SRD5A2	P31213	Not Available	unknown	Drugbank
Lauric acid	CYP2C18	P33260	Not Available	unknown	Drugbank
Lauric acid	CYP2C19	P33261	Not Available	unknown	Drugbank
Lauric acid	RCV1	P35243	Not Available	unknown	Drugbank
Lauric acid	NAC1	P35498	Not Available	unknown	Drugbank
Lauric acid	SCN4A	P35499	Not Available	unknown	Drugbank
Lauric acid	GNT1	P35503	Not Available	unknown	Drugbank
Lauric acid	HNF4	P41235	Not Available	unknown	Drugbank
Lauric acid	C6orf131	P43080	Not Available	unknown	Drugbank
Lauric acid	ACADSB	P45954	Not Available	unknown	Drugbank
Lauric acid	PPT	P50897	Not Available	unknown	Drugbank
Lauric acid	ALDH5A1	P51649	Not Available	unknown	Drugbank
Lauric acid	AKR1D1	P51857	Not Available	unknown	Drugbank
Lauric acid	MCT1	P53985	Not Available	unknown	Drugbank
Lauric acid	UGT2B15	P54855	Not Available	unknown	Drugbank
Lauric acid	PKIA	P61925	Not Available	unknown	Drugbank
Lauric acid	CALM	P62158	Not Available	unknown	Drugbank
Lauric acid	ARF6	P62330	Not Available	unknown	Drugbank
Lauric acid	FKBP1	P62942	Not Available	unknown	Drugbank
Lauric acid	CNA2	P63098	Not Available	unknown	Drugbank
Lauric acid	HBB	P68871	Not Available	unknown	Drugbank
Lauric acid	HBA1	P69905	Not Available	unknown	Drugbank
Lauric acid	HNL	P80188	Not Available	unknown	Drugbank
Lauric acid	ABAT	P80404	Not Available	unknown	Drugbank
Lauric acid	ARF1	P84077	Not Available	unknown	Drugbank
Lauric acid	SCN6A	Q01118	Not Available	unknown	Drugbank
Lauric acid	FABP5	Q01469	Not Available	unknown	Drugbank
Lauric acid	OGDH	Q02218	Not Available	unknown	Drugbank
Lauric acid	AO	Q06278	Not Available	unknown	Drugbank
Lauric acid	SCN1B	Q07699	Not Available	unknown	Drugbank
Lauric acid	CALNA	Q08209	Not Available	unknown	Drugbank
Lauric acid	SCN5A	Q14524	Not Available	unknown	Drugbank
Lauric acid	HNF4G	Q14541	Not Available	unknown	Drugbank
Lauric acid	ACOX	Q15067	Not Available	unknown	Drugbank
Lauric acid	BHLHE74	Q15788	Not Available	unknown	Drugbank
Lauric acid	NENA	Q15858	Not Available	unknown	Drugbank
Lauric acid	OAT1	Q4U2R8	Not Available	unknown	Drugbank
Lauric acid	OAT1	Q4U2R8	Not Available	unknown	Drugbank
Lauric acid	SCN4B	Q8IWT1	Not Available	unknown	Drugbank
Lauric acid	OAT3	Q8TCC7	Not Available	unknown	Drugbank
Lauric acid	OAT3	Q8TCC7	Not Available	unknown	Drugbank
Lauric acid	HDAC2	Q92769	Not Available	unknown	Drugbank
Lauric acid	NAC2	Q99250	Not Available	unknown	Drugbank
Lauric acid	GNT1	Q9HAW8	Not Available	unknown	Drugbank
Lauric acid	GNT1	Q9HAW9	Not Available	unknown	Drugbank
Lauric acid	OAT4	Q9NSA0	Not Available	unknown	Drugbank
Lauric acid	KIAA1356	Q9NY46	Not Available	unknown	Drugbank
Lauric acid	KIAA1158	Q9NY72	Not Available	unknown	Drugbank
Lauric acid	GLTP	Q9NZD2	Not Available	unknown	Drugbank
Lauric acid	PLA2G2E	Q9NZK7	Not Available	unknown	Drugbank
Lauric acid	SCN11A	Q9UI33	Not Available	unknown	Drugbank
Lauric acid	GOX1	Q9UJM8	Not Available	unknown	Drugbank
Lauric acid	HDAC7	Q9UKV0	Not Available	unknown	Drugbank
Lauric acid	PLA2G2D	Q9UNK4	Not Available	unknown	Drugbank
Lauric acid	MED	Q9UQD0	Not Available	unknown	Drugbank
Lauric acid	SCN10A	Q9Y5Y9	Not Available	unknown	Drugbank
Lauric acid	NLT	Q9Y694	Not Available	unknown	Drugbank
Lauric acid	ESOP1	Q9Y6Y9	Not Available	unknown	Drugbank
Lauric acid	ESOP1	Q9Y6Y9	Not Available	unknown	Drugbank
Lauric acid	TLR4	O00206	0.982	activation	Stitch
Lauric acid	CYP4A11	Q02928	0.974	catalysis	Stitch
Lauric acid	ALB	P02768	0.933	binding	Stitch
Lauric acid	UTS2R	Q9UKP6	0.924	reaction	Stitch
Lauric acid	GAST	P01350	0.913	reaction	Stitch
Lauric acid	TRH	P20396	0.912	reaction	Stitch
Lauric acid	FASN	P49327	0.911	unknown	Stitch
Lauric acid	PIK3CA	P42336	0.91	unknown	Stitch
Lauric acid	LY96	Q9Y6Y9	0.909	binding	Stitch
Lauric acid	FFAR1	O14842	0.907	reaction	Stitch
Lauric acid	CCK	P06307	0.905	reaction	Stitch
Lauric acid	APP	P05067	0.904	reaction	Stitch
Lauric acid	ACOT7	O00154	0.9	catalysis	Stitch
Lauric acid	F2RL2	O00254	0.9	reaction	Stitch
Lauric acid	P2RY10	O00398	0.9	reaction	Stitch
Lauric acid	PIK3R2	O00459	0.9	unknown	Stitch
Lauric acid	NPFF	O15130	0.9	reaction	Stitch
Lauric acid	FFAR2	O15552	0.9	reaction	Stitch
Lauric acid	MLNR	O43193	0.9	reaction	Stitch
Lauric acid	GNRH2	O43555	0.9	reaction	Stitch
Lauric acid	HCRT	O43612	0.9	reaction	Stitch
Lauric acid	HCRTR1	O43613	0.9	reaction	Stitch
Lauric acid	HCRTR2	O43614	0.9	reaction	Stitch
Lauric acid	UTS2	O95399	0.9	reaction	Stitch
Lauric acid	NTSR2	O95665	0.9	reaction	Stitch
Lauric acid	GNA14	O95837	0.9	reaction	Stitch
Lauric acid	AGT	P01019	0.9	reaction	Stitch
Lauric acid	KNG1	P01042	0.9	reaction	Stitch
Lauric acid	GNRH1	P01148	0.9	reaction	Stitch
Lauric acid	OXT	P01178	0.9	reaction	Stitch
Lauric acid	AVP	P01185	0.9	reaction	Stitch
Lauric acid	GCG	P01275	0.9	activation	Stitch
Lauric acid	ANXA1	P04083	0.9	reaction	Stitch
Lauric acid	EDN1	P05305	0.9	reaction	Stitch
Lauric acid	C8G	P07360	0.9	binding	Stitch
Lauric acid	GRP	P07492	0.9	reaction	Stitch
Lauric acid	CD55	P08174	0.9	binding	Stitch
Lauric acid	CHRM5	P08912	0.9	reaction	Stitch
Lauric acid	NMB	P08949	0.9	reaction	Stitch
Lauric acid	GIP	P09681	0.9	activation	Stitch
Lauric acid	NPS	P0C0P6	0.9	reaction	Stitch
Lauric acid	CHRM1	P11229	0.9	reaction	Stitch
Lauric acid	ADH5	P11766	0.9	reaction	Stitch
Lauric acid	MLN	P12872	0.9	reaction	Stitch
Lauric acid	EDN3	P14138	0.9	reaction	Stitch
Lauric acid	GM2A	P17900	0.9	binding	Stitch
Lauric acid	CHRM3	P20309	0.9	reaction	Stitch
Lauric acid	TAC1	P20366	0.9	reaction	Stitch
Lauric acid	PMCH	P20382	0.9	reaction	Stitch
Lauric acid	EDN2	P20800	0.9	reaction	Stitch
Lauric acid	TACR2	P21452	0.9	reaction	Stitch
Lauric acid	TBXA2R	P21731	0.9	reaction	Stitch
Lauric acid	EDNRB	P24530	0.9	reaction	Stitch
Lauric acid	FPR2	P25090	0.9	reaction	Stitch
Lauric acid	ADRBK1	P25098	0.9	unknown	Stitch
Lauric acid	ADRA1D	P25100	0.9	reaction	Stitch
Lauric acid	EDNRA	P25101	0.9	reaction	Stitch
Lauric acid	TACR1	P25103	0.9	reaction	Stitch
Lauric acid	PTAFR	P25105	0.9	reaction	Stitch
Lauric acid	F2R	P25116	0.9	reaction	Stitch
Lauric acid	PIK3R1	P27986	0.9	unknown	Stitch
Lauric acid	HTR2A	P28223	0.9	reaction	Stitch
Lauric acid	HTR2C	P28335	0.9	reaction	Stitch
Lauric acid	NMBR	P28336	0.9	reaction	Stitch
Lauric acid	PCSK1	P29120	0.9	unknown	Stitch
Lauric acid	TACR3	P29371	0.9	reaction	Stitch
Lauric acid	GNA11	P29992	0.9	reaction	Stitch
Lauric acid	BDKRB2	P30411	0.9	reaction	Stitch
Lauric acid	GRPR	P30550	0.9	reaction	Stitch
Lauric acid	AGTR1	P30556	0.9	reaction	Stitch
Lauric acid	OXTR	P30559	0.9	reaction	Stitch
Lauric acid	GNA15	P30679	0.9	reaction	Stitch
Lauric acid	GNRHR	P30968	0.9	reaction	Stitch
Lauric acid	NTSR1	P30989	0.9	reaction	Stitch
Lauric acid	NTS	P30990	0.9	reaction	Stitch
Lauric acid	CCKAR	P32238	0.9	reaction	Stitch
Lauric acid	CCKBR	P32239	0.9	reaction	Stitch
Lauric acid	GRK5	P34947	0.9	unknown	Stitch
Lauric acid	TRHR	P34981	0.9	reaction	Stitch
Lauric acid	PTGER1	P34995	0.9	reaction	Stitch
Lauric acid	ADRA1A	P35348	0.9	reaction	Stitch
Lauric acid	HRH1	P35367	0.9	reaction	Stitch
Lauric acid	ADRA1B	P35368	0.9	reaction	Stitch
Lauric acid	AVPR1A	P37288	0.9	reaction	Stitch
Lauric acid	CASR	P41180	0.9	reaction	Stitch
Lauric acid	RGS2	P41220	0.9	unknown	Stitch
Lauric acid	P2RY2	P41231	0.9	reaction	Stitch
Lauric acid	HTR2B	P41595	0.9	reaction	Stitch
Lauric acid	PTGFR	P43088	0.9	reaction	Stitch
Lauric acid	LPAR6	P43657	0.9	reaction	Stitch
Lauric acid	GPR4	P46093	0.9	reaction	Stitch
Lauric acid	XCR1	P46094	0.9	reaction	Stitch
Lauric acid	BDKRB1	P46663	0.9	reaction	Stitch
Lauric acid	GCGR	P47871	0.9	reaction	Stitch
Lauric acid	P2RY1	P47900	0.9	reaction	Stitch
Lauric acid	AVPR1B	P47901	0.9	reaction	Stitch
Lauric acid	XCL1	P47992	0.9	reaction	Stitch
Lauric acid	NMU	P48645	0.9	reaction	Stitch
Lauric acid	ACOT2	P49753	0.9	catalysis	Stitch
Lauric acid	RGS19	P49795	0.9	unknown	Stitch
Lauric acid	GNAQ	P50148	0.9	reaction	Stitch
Lauric acid	F2RL1	P55085	0.9	reaction	Stitch
Lauric acid	PROK1	P58294	0.9	reaction	Stitch
Lauric acid	GNG2	P59768	0.9	reaction	Stitch
Lauric acid	GNB1	P62873	0.9	reaction	Stitch
Lauric acid	QRFP	P83859	0.9	reaction	Stitch
Lauric acid	VLDLR	P98155	0.9	binding	Stitch
Lauric acid	PLCB2	Q00722	0.9	unknown	Stitch
Lauric acid	PLCB3	Q01970	0.9	unknown	Stitch
Lauric acid	GPR17	Q13304	0.9	reaction	Stitch
Lauric acid	UNC119	Q13432	0.9	binding	Stitch
Lauric acid	P2RY6	Q15077	0.9	reaction	Stitch
Lauric acid	PLCB4	Q15147	0.9	unknown	Stitch
Lauric acid	LTB4R	Q15722	0.9	reaction	Stitch
Lauric acid	KISS1	Q15726	0.9	reaction	Stitch
Lauric acid	GPR68	Q15743	0.9	reaction	Stitch
Lauric acid	NMS	Q5H8A3	0.9	reaction	Stitch
Lauric acid	GPRC6A	Q5T6X5	0.9	reaction	Stitch
Lauric acid	NPSR1	Q6W5P4	0.9	reaction	Stitch
Lauric acid	UTS2D	Q765I0	0.9	reaction	Stitch
Lauric acid	ACOT1	Q86TX2	0.9	catalysis	Stitch
Lauric acid	ARHGEF25	Q86VW2	0.9	unknown	Stitch
Lauric acid	GPR65	Q8IYL9	0.9	reaction	Stitch
Lauric acid	ACOT4	Q8N9L9	0.9	inhibition	Stitch
Lauric acid	PROKR2	Q8NFJ6	0.9	reaction	Stitch
Lauric acid	PROKR1	Q8TCW9	0.9	reaction	Stitch
Lauric acid	PIK3R3	Q92569	0.9	unknown	Stitch
Lauric acid	LPAR1	Q92633	0.9	reaction	Stitch
Lauric acid	GHSR	Q92847	0.9	reaction	Stitch
Lauric acid	KISS1R	Q969F8	0.9	reaction	Stitch
Lauric acid	MCHR2	Q969V1	0.9	reaction	Stitch
Lauric acid	QRFPR	Q96P65	0.9	reaction	Stitch
Lauric acid	GNRHR2	Q96P88	0.9	reaction	Stitch
Lauric acid	F2RL3	Q96RI0	0.9	reaction	Stitch
Lauric acid	LPAR4	Q99677	0.9	reaction	Stitch
Lauric acid	MCHR1	Q99705	0.9	reaction	Stitch
Lauric acid	NMUR2	Q9GZQ4	0.9	reaction	Stitch
Lauric acid	NPFFR1	Q9GZQ6	0.9	reaction	Stitch
Lauric acid	NMUR1	Q9HB89	0.9	reaction	Stitch
Lauric acid	LPAR2	Q9HBW0	0.9	reaction	Stitch
Lauric acid	PROK2	Q9HC23	0.9	reaction	Stitch
Lauric acid	LTB4R2	Q9NPC1	0.9	reaction	Stitch
Lauric acid	PLCB1	Q9NQ66	0.9	unknown	Stitch
Lauric acid	RGS18	Q9NS28	0.9	unknown	Stitch
Lauric acid	CYSLTR2	Q9NS75	0.9	reaction	Stitch
Lauric acid	GLTP	Q9NZD2	0.9	binding	Stitch
Lauric acid	XCL2	Q9UBD3	0.9	reaction	Stitch
Lauric acid	LPAR3	Q9UBY5	0.9	reaction	Stitch
Lauric acid	TAC3	Q9UHF0	0.9	reaction	Stitch
Lauric acid	OPN4	Q9UHM6	0.9	reaction	Stitch
Lauric acid	GPR132	Q9UNW8	0.9	reaction	Stitch
Lauric acid	CYSLTR1	Q9Y271	0.9	reaction	Stitch
Lauric acid	NPFFR2	Q9Y5X5	0.9	reaction	Stitch
Lauric acid	INS	P01308	0.845	activation	Stitch
Lauric acid	PAEP	P09466	0.836	binding	Stitch
Lauric acid	IL8	A0A024RDA5	0.824	activation	Stitch
Lauric acid	PPARA	Q07869	0.819	activation	Stitch
Lauric acid	TLR2	O60603	0.817	activation	Stitch
Lauric acid	APOB	P04114	0.816	activation	Stitch
Lauric acid	PTGS2	P35354	0.8	activation	Stitch
Lauric acid	CD86	P42081	0.8	activation	Stitch
Lauric acid	UCP2	P55851	0.8	activation	Stitch
Lauric acid	CYP2E1	P05181	0.765	unknown	Stitch
Lauric acid	CYP2C9	P11712	0.746	unknown	Stitch
Lauric acid	RELA	Q04206	0.715	activation	Stitch
Lauric acid	CYP4Z1	Q86W10	0.7	inhibition	Stitch
Lauric acid	CYP4A22	Q5TCH4	0.649	catalysis	Stitch
Lauric acid	AFM	P43652	0.583	unknown	Stitch
Lauric acid	BEND1	Q8N9N5	0.543	unknown	Stitch
Lauric acid	NOS2	P35228	0.509	activation	Stitch
Lauric acid	SETMAR	Q53H47	0.469	unknown	Stitch
Lauric acid	BANP	Q8N9N5	0.45	unknown	Stitch
Lauric acid	OXSM	Q9NWU1	0.434	unknown	Stitch
leonuride	AKT1	P31749	0.8	activation	Stitch
leonuride	GDNF	P39905	0.8	activation	Stitch
Leucosceptoside A	PRKCA	P17252	0.682	unknown	Stitch
Leucosceptoside A	PRKCB	P05771	0.438	unknown	Stitch
linoleic acid	FFAR1	O14842	Not Available	unknown	Drugbank
linoleic acid	BLBP	O15540	Not Available	unknown	Drugbank
linoleic acid	BLBP	O15540	Not Available	unknown	Drugbank
linoleic acid	BLBP	O15540	Not Available	unknown	Drugbank
linoleic acid	BLBP	O15540	Not Available	unknown	Drugbank
linoleic acid	FADS1	O60427	Not Available	unknown	Drugbank
linoleic acid	FADS1	O60427	Not Available	unknown	Drugbank
linoleic acid	ACS4	O60488	Not Available	unknown	Drugbank
linoleic acid	ACS3	O95573	Not Available	unknown	Drugbank
linoleic acid	FADS2	O95864	Not Available	unknown	Drugbank
linoleic acid	F12	P00748	Not Available	unknown	Drugbank
linoleic acid	PMP2	P02689	Not Available	unknown	Drugbank
linoleic acid	ALB	P02768	Not Available	unknown	Drugbank
linoleic acid	ALB	P02768	Not Available	unknown	Drugbank
linoleic acid	GC	P02774	Not Available	unknown	Drugbank
linoleic acid	FABP11	P05413	Not Available	unknown	Drugbank
linoleic acid	FABP1	P07148	Not Available	unknown	Drugbank
linoleic acid	FABP2	P12104	Not Available	unknown	Drugbank
linoleic acid	FABP4	P15090	Not Available	unknown	Drugbank
linoleic acid	FABP4	P15090	Not Available	unknown	Drugbank
linoleic acid	COX1	P23219	Not Available	unknown	Drugbank
linoleic acid	COX1	P23219	Not Available	unknown	Drugbank
linoleic acid	COX1	P23219	Not Available	unknown	Drugbank
linoleic acid	CNC	P32418	Not Available	unknown	Drugbank
linoleic acid	CNC	P32418	Not Available	unknown	Drugbank
linoleic acid	COX2	P35354	Not Available	unknown	Drugbank
linoleic acid	COX2	P35354	Not Available	unknown	Drugbank
linoleic acid	NR1C3	P37231	Not Available	unknown	Drugbank
linoleic acid	NR1C2	Q03181	Not Available	unknown	Drugbank
linoleic acid	NR1C2	Q03181	Not Available	unknown	Drugbank
linoleic acid	TRPV1	Q8NER1	Not Available	unknown	Drugbank
linoleic acid	TRPV1	Q8NER1	Not Available	unknown	Drugbank
linoleic acid	OATP2A1	Q92959	Not Available	unknown	Drugbank
linoleic acid	APH1A	Q96BI3	Not Available	unknown	Drugbank
linoleic acid	ELOVL4	Q9GZR5	Not Available	unknown	Drugbank
linoleic acid	MDS033	Q9NZ42	Not Available	unknown	Drugbank
linoleic acid	GLTP	Q9NZD2	Not Available	unknown	Drugbank
linoleic acid	PPARA	Q07869	0.988	activation	Stitch
linoleic acid	APOA1	P02647	0.985	activation/inhibition	Stitch
linoleic acid	ABCA1	O95477	0.984	activation/inhibition	Stitch
linoleic acid	ANGPTL4	Q9BY76	0.981	activation	Stitch
linoleic acid	ACSL4	O60488	0.98	inhibition	Stitch
linoleic acid	ALOX15	P16050	0.97	unknown	Stitch
linoleic acid	FABP4	P15090	0.961	binding	Stitch
linoleic acid	FADS2	O95864	0.951	unknown	Stitch
linoleic acid	FADS1	O60427	0.938	activation	Stitch
linoleic acid	FFAR1	O14842	0.932	activation	Stitch
linoleic acid	CD36	P16671	0.93	activation	Stitch
linoleic acid	CYP3A4	P08684	0.924	unknown	Stitch
linoleic acid	CYP3A5	P20815	0.924	unknown	Stitch
linoleic acid	CYP3A7	P24462	0.924	unknown	Stitch
linoleic acid	CYP3A43	Q9HB55	0.924	unknown	Stitch
linoleic acid	SLC27A1	Q6PCB7	0.92	activation	Stitch
linoleic acid	NCOR2	Q9Y618	0.919	unknown	Stitch
linoleic acid	PLA2G2A	P14555	0.918	unknown	Stitch
linoleic acid	TGS1	Q96RS0	0.918	reaction	Stitch
linoleic acid	CYP7A1	P22680	0.917	activation	Stitch
linoleic acid	PLA2G10	O15496	0.915	unknown	Stitch
linoleic acid	PLA2G6	O60733	0.915	unknown	Stitch
linoleic acid	CYP2J2	P51589	0.915	unknown	Stitch
linoleic acid	HDAC3	O15379	0.913	unknown	Stitch
linoleic acid	NCOR1	O75376	0.913	unknown	Stitch
linoleic acid	NCOA6	Q14686	0.913	reaction	Stitch
linoleic acid	MED1	Q15648	0.913	reaction	Stitch
linoleic acid	MED25	Q71SY5	0.913	unknown	Stitch
linoleic acid	PLA2G4A	P47712	0.911	unknown	Stitch
linoleic acid	SREBF2	Q12772	0.911	activation	Stitch
linoleic acid	PLA2G2D	Q9UNK4	0.911	unknown	Stitch
linoleic acid	APOA2	P02652	0.91	activation	Stitch
linoleic acid	HMGCS2	P54868	0.91	activation	Stitch
linoleic acid	RXRA	P19793	0.909	reaction	Stitch
linoleic acid	ACSL1	P33121	0.909	activation	Stitch
linoleic acid	CPT1A	P50416	0.909	activation	Stitch
linoleic acid	PLIN2	Q99541	0.909	activation	Stitch
linoleic acid	SLC27A2	O14975	0.908	catalysis	Stitch
linoleic acid	CYP2E1	P05181	0.908	unknown	Stitch
linoleic acid	PLA2G5	P39877	0.908	unknown	Stitch
linoleic acid	ME1	P48163	0.908	activation	Stitch
linoleic acid	CYP4A11	Q02928	0.908	activation	Stitch
linoleic acid	PLA2G3	Q9NZ20	0.908	unknown	Stitch
linoleic acid	CYP2C9	P11712	0.907	unknown	Stitch
linoleic acid	EP300	Q09472	0.907	unknown	Stitch
linoleic acid	HIF1A	Q16665	0.907	unknown	Stitch
linoleic acid	CREBBP	Q92793	0.907	reaction	Stitch
linoleic acid	PPARGC1A	Q9UBK2	0.907	unknown	Stitch
linoleic acid	FABP1	P07148	0.906	activation	Stitch
linoleic acid	ACSL3	O95573	0.905	catalysis	Stitch
linoleic acid	AGT	P01019	0.905	activation	Stitch
linoleic acid	PLA2G1B	P04054	0.905	unknown	Stitch
linoleic acid	CYP1A1	P04798	0.905	activation	Stitch
linoleic acid	CYP1A2	P05177	0.905	unknown	Stitch
linoleic acid	HMGCS1	Q01581	0.905	activation	Stitch
linoleic acid	PLA2G4B	P0C869	0.903	unknown	Stitch
linoleic acid	PLA2G4E	Q3MJ16	0.903	unknown	Stitch
linoleic acid	MED19	A0JLT2	0.9	unknown	Stitch
linoleic acid	ARNTL	O00327	0.9	unknown	Stitch
linoleic acid	CLOCK	O15516	0.9	unknown	Stitch
linoleic acid	MED7	O43513	0.9	unknown	Stitch
linoleic acid	MED14	O60244	0.9	unknown	Stitch
linoleic acid	UGT1A9	O60656	0.9	activation	Stitch
linoleic acid	TBL1X	O60907	0.9	reaction	Stitch
linoleic acid	PEX11A	O75192	0.9	activation	Stitch
linoleic acid	MED24	O75448	0.9	unknown	Stitch
linoleic acid	TNFRSF21	O75509	0.9	activation	Stitch
linoleic acid	MED6	O75586	0.9	unknown	Stitch
linoleic acid	MED26	O95402	0.9	unknown	Stitch
linoleic acid	SP1	P08047	0.9	activation	Stitch
linoleic acid	CYP2C8	P10632	0.9	unknown	Stitch
linoleic acid	ACADM	P11310	0.9	activation	Stitch
linoleic acid	ALAS1	P13196	0.9	activation	Stitch
linoleic acid	ABCB4	P21439	0.9	activation	Stitch
linoleic acid	NFYA	P23511	0.9	activation	Stitch
linoleic acid	CPT2	P23786	0.9	activation	Stitch
linoleic acid	CCNC	P24863	0.9	unknown	Stitch
linoleic acid	NFYB	P25208	0.9	activation	Stitch
linoleic acid	G0S2	P27469	0.9	activation	Stitch
linoleic acid	TEAD1	P28347	0.9	unknown	Stitch
linoleic acid	CTGF	P29279	0.9	activation	Stitch
linoleic acid	CYP2C18	P33260	0.9	unknown	Stitch
linoleic acid	CYP2C19	P33261	0.9	unknown	Stitch
linoleic acid	RORA	P35398	0.9	unknown	Stitch
linoleic acid	FDFT1	P37268	0.9	activation	Stitch
linoleic acid	YAP1	P46937	0.9	unknown	Stitch
linoleic acid	GLIPR1	P48060	0.9	activation	Stitch
linoleic acid	CDK8	P49336	0.9	unknown	Stitch
linoleic acid	SULT2A1	Q06520	0.9	activation	Stitch
linoleic acid	MED21	Q13503	0.9	unknown	Stitch
linoleic acid	NFYC	Q13952	0.9	activation	Stitch
linoleic acid	FHL2	Q14192	0.9	activation	Stitch
linoleic acid	ANKRD1	Q15327	0.9	activation	Stitch
linoleic acid	MED22	Q15528	0.9	unknown	Stitch
linoleic acid	TEAD4	Q15561	0.9	unknown	Stitch
linoleic acid	TEAD2	Q15562	0.9	unknown	Stitch
linoleic acid	NCOA2	Q15596	0.9	reaction	Stitch
linoleic acid	NCOA1	Q15788	0.9	unknown	Stitch
linoleic acid	TXNRD1	Q16881	0.9	activation	Stitch
linoleic acid	CHD9	Q3L8U1	0.9	reaction	Stitch
linoleic acid	PRIC285	Q4VXQ0	0.9	unknown	Stitch
linoleic acid	ACSBG2	Q5FVE4	0.9	catalysis	Stitch
linoleic acid	PLA2G2C	Q5R387	0.9	unknown	Stitch
linoleic acid	PLB1	Q6P1J6	0.9	unknown	Stitch
linoleic acid	MED27	Q6P2C8	0.9	unknown	Stitch
linoleic acid	APOA5	Q6Q788	0.9	activation	Stitch
linoleic acid	SMARCD3	Q6STE5	0.9	reaction	Stitch
linoleic acid	MED13L	Q71F56	0.9	unknown	Stitch
linoleic acid	CARM1	Q86X55	0.9	reaction	Stitch
linoleic acid	TIAM2	Q8IVF5	0.9	activation	Stitch
linoleic acid	MED12	Q93074	0.9	unknown	Stitch
linoleic acid	MED8	Q96G25	0.9	unknown	Stitch
linoleic acid	ACSBG1	Q96GR2	0.9	catalysis	Stitch
linoleic acid	MED30	Q96HR3	0.9	unknown	Stitch
linoleic acid	MED15	Q96RN5	0.9	unknown	Stitch
linoleic acid	TRIB3	Q96RU7	0.9	activation	Stitch
linoleic acid	SIN3A	Q96ST3	0.9	reaction	Stitch
linoleic acid	TEAD3	Q99594	0.9	unknown	Stitch
linoleic acid	NPAS2	Q99743	0.9	activation	Stitch
linoleic acid	MED10	Q9BTT4	0.9	unknown	Stitch
linoleic acid	MED18	Q9BUE0	0.9	unknown	Stitch
linoleic acid	CDK19	Q9BWU1	0.9	unknown	Stitch
linoleic acid	PLA2G12B	Q9BX93	0.9	unknown	Stitch
linoleic acid	TBL1XR1	Q9BZK7	0.9	reaction	Stitch
linoleic acid	PLA2G12A	Q9BZM1	0.9	unknown	Stitch
linoleic acid	PLA2G2F	Q9BZM2	0.9	unknown	Stitch
linoleic acid	WWTR1	Q9GZV5	0.9	unknown	Stitch
linoleic acid	MED20	Q9H944	0.9	unknown	Stitch
linoleic acid	MED4	Q9NPJ6	0.9	unknown	Stitch
linoleic acid	MED17	Q9NVC6	0.9	unknown	Stitch
linoleic acid	MED9	Q9NWA0	0.9	unknown	Stitch
linoleic acid	MED29	Q9NX70	0.9	unknown	Stitch
linoleic acid	GLTP	Q9NZD2	0.9	binding	Stitch
linoleic acid	GRHL1	Q9NZI5	0.9	activation	Stitch
linoleic acid	PLA2G2E	Q9NZK7	0.9	unknown	Stitch
linoleic acid	RGL1	Q9NZL6	0.9	activation	Stitch
linoleic acid	MED11	Q9P086	0.9	unknown	Stitch
linoleic acid	MED13	Q9UHV7	0.9	unknown	Stitch
linoleic acid	MED23	Q9ULK4	0.9	unknown	Stitch
linoleic acid	MED16	Q9Y2X0	0.9	unknown	Stitch
linoleic acid	MED31	Q9Y3C7	0.9	unknown	Stitch
linoleic acid	NCOA3	Q9Y6Q9	0.9	unknown	Stitch
linoleic acid	SCD	O00767	0.893	inhibition	Stitch
linoleic acid	LPL	P06858	0.892	inhibition	Stitch
linoleic acid	LEP	P41159	0.869	inhibition	Stitch
linoleic acid	CSN1S1	P47710	0.862	inhibition	Stitch
linoleic acid	CETP	P11597	0.861	activation	Stitch
linoleic acid	OLR1	P78380	0.854	activation	Stitch
linoleic acid	LDLR	P01130	0.851	activation	Stitch
linoleic acid	UCP2	P55851	0.847	activation	Stitch
linoleic acid	PAEP	P09466	0.836	binding	Stitch
linoleic acid	IL6	P05231	0.831	activation	Stitch
linoleic acid	VCAM1	P19320	0.831	activation	Stitch
linoleic acid	APOB	P04114	0.828	activation	Stitch
linoleic acid	SELE	P16581	0.822	activation	Stitch
linoleic acid	FOS	P01100	0.82	activation	Stitch
linoleic acid	TYR	P14679	0.82	inhibition	Stitch
linoleic acid	SERPINE1	P05121	0.819	activation	Stitch
linoleic acid	NOS3	P29474	0.819	inhibition	Stitch
linoleic acid	MAPK8	P45983	0.814	activation	Stitch
linoleic acid	CYP19A1	P11511	0.812	inhibition	Stitch
linoleic acid	MME	P08473	0.8	activation	Stitch
linoleic acid	PRKCE	Q02156	0.8	activation	Stitch
linoleic acid	FGF21	Q9NSA1	0.8	activation	Stitch
linoleic acid	ALOX15B	O15296	0.785	unknown	Stitch
linoleic acid	NFKB1	P19838	0.746	activation	Stitch
linoleic acid	RELA	Q04206	0.745	activation	Stitch
linoleic acid	PTGS2	P35354	0.609	unknown	Stitch
linoleic acid	FABP3	P05413	0.553	binding	Stitch
linoleic acid	CCNF	P41002	0.475	activation	Stitch
linoleic acid	PPARG	P37231	0.465	unknown	Stitch
linoleic acid	INS	P01308	0.455	unknown	Stitch
linoleic acid	LCAT	P04180	0.405	unknown	Stitch
L-Pyroglutamic acid（5-oxoproline）	P4HA2	O15460	Not Available	unknown	Drugbank
L-Pyroglutamic acid（5-oxoproline）	P4HA2	O15460	Not Available	unknown	Drugbank
L-Pyroglutamic acid（5-oxoproline）	PIG6	O43272	Not Available	unknown	Drugbank
L-Pyroglutamic acid（5-oxoproline）	PIG6	O43272	Not Available	unknown	Drugbank
L-Pyroglutamic acid（5-oxoproline）	PIG6	O43272	Not Available	unknown	Drugbank
L-Pyroglutamic acid（5-oxoproline）	PIG6	O43272	Not Available	unknown	Drugbank
L-Pyroglutamic acid（5-oxoproline）	CYP20	O43447	Not Available	unknown	Drugbank
L-Pyroglutamic acid（5-oxoproline）	CYP20	O43447	Not Available	unknown	Drugbank
L-Pyroglutamic acid（5-oxoproline）	HCRT	O43612	Not Available	unknown	Drugbank
L-Pyroglutamic acid（5-oxoproline）	HCRT	O43612	Not Available	unknown	Drugbank
L-Pyroglutamic acid（5-oxoproline）	PROSC	O94903	Not Available	unknown	Drugbank
L-Pyroglutamic acid（5-oxoproline）	PROSC	O94903	Not Available	unknown	Drugbank
L-Pyroglutamic acid（5-oxoproline）	ANG	P03950	Not Available	unknown	Drugbank
L-Pyroglutamic acid（5-oxoproline）	ANG	P03950	Not Available	unknown	Drugbank
L-Pyroglutamic acid（5-oxoproline）	AMY1	P04745	Not Available	unknown	Drugbank
L-Pyroglutamic acid（5-oxoproline）	AMY1	P04745	Not Available	unknown	Drugbank
L-Pyroglutamic acid（5-oxoproline）	AMY2A	P04746	Not Available	unknown	Drugbank
L-Pyroglutamic acid（5-oxoproline）	AMY2A	P04746	Not Available	unknown	Drugbank
L-Pyroglutamic acid（5-oxoproline）	AMY2A	P04746	Not Available	unknown	Drugbank
L-Pyroglutamic acid（5-oxoproline）	AMY2A	P04746	Not Available	unknown	Drugbank
L-Pyroglutamic acid（5-oxoproline）	ATP5B	P06576	Not Available	unknown	Drugbank
L-Pyroglutamic acid（5-oxoproline）	ATP5B	P06576	Not Available	unknown	Drugbank
L-Pyroglutamic acid（5-oxoproline）	EPRS	P07814	Not Available	unknown	Drugbank
L-Pyroglutamic acid（5-oxoproline）	EPRS	P07814	Not Available	unknown	Drugbank
L-Pyroglutamic acid（5-oxoproline）	IGLC1	P0CG04	Not Available	unknown	Drugbank
L-Pyroglutamic acid（5-oxoproline）	IGLC1	P0CG04	Not Available	unknown	Drugbank
L-Pyroglutamic acid（5-oxoproline）	P4HA	P13674	Not Available	unknown	Drugbank
L-Pyroglutamic acid（5-oxoproline）	P4HA	P13674	Not Available	unknown	Drugbank
L-Pyroglutamic acid（5-oxoproline）	VEGF	P15692	Not Available	unknown	Drugbank
L-Pyroglutamic acid（5-oxoproline）	VEGF	P15692	Not Available	unknown	Drugbank
L-Pyroglutamic acid（5-oxoproline）	AMY2B	P19961	Not Available	unknown	Drugbank
L-Pyroglutamic acid（5-oxoproline）	AMY2B	P19961	Not Available	unknown	Drugbank
L-Pyroglutamic acid（5-oxoproline）	CYPB	P23284	Not Available	unknown	Drugbank
L-Pyroglutamic acid（5-oxoproline）	CYPB	P23284	Not Available	unknown	Drugbank
L-Pyroglutamic acid（5-oxoproline）	ATP5A	P25705	Not Available	unknown	Drugbank
L-Pyroglutamic acid（5-oxoproline）	ATP5A	P25705	Not Available	unknown	Drugbank
L-Pyroglutamic acid（5-oxoproline）	CYP3	P30405	Not Available	unknown	Drugbank
L-Pyroglutamic acid（5-oxoproline）	CYP3	P30405	Not Available	unknown	Drugbank
L-Pyroglutamic acid（5-oxoproline）	PYCR1	P32322	Not Available	unknown	Drugbank
L-Pyroglutamic acid（5-oxoproline）	PYCR1	P32322	Not Available	unknown	Drugbank
L-Pyroglutamic acid（5-oxoproline）	ATP5C	P36542	Not Available	unknown	Drugbank
L-Pyroglutamic acid（5-oxoproline）	ATP5C	P36542	Not Available	unknown	Drugbank
L-Pyroglutamic acid（5-oxoproline）	CYPC	P45877	Not Available	unknown	Drugbank
L-Pyroglutamic acid（5-oxoproline）	CYPC	P45877	Not Available	unknown	Drugbank
L-Pyroglutamic acid（5-oxoproline）	GSS	P48637	Not Available	unknown	Drugbank
L-Pyroglutamic acid（5-oxoproline）	GSS	P48637	Not Available	unknown	Drugbank
L-Pyroglutamic acid（5-oxoproline）	CYPA	P62937	Not Available	unknown	Drugbank
L-Pyroglutamic acid（5-oxoproline）	CYPA	P62937	Not Available	unknown	Drugbank
L-Pyroglutamic acid（5-oxoproline）	CCL8	P80075	Not Available	unknown	Drugbank
L-Pyroglutamic acid（5-oxoproline）	CCL8	P80075	Not Available	unknown	Drugbank
L-Pyroglutamic acid（5-oxoproline）	SML1	Q03403	Not Available	unknown	Drugbank
L-Pyroglutamic acid（5-oxoproline）	SML1	Q03403	Not Available	unknown	Drugbank
L-Pyroglutamic acid（5-oxoproline）	PPIG	Q13427	Not Available	unknown	Drugbank
L-Pyroglutamic acid（5-oxoproline）	PPIG	Q13427	Not Available	unknown	Drugbank
L-Pyroglutamic acid（5-oxoproline）	GROS1	Q32P28	Not Available	unknown	Drugbank
L-Pyroglutamic acid（5-oxoproline）	GROS1	Q32P28	Not Available	unknown	Drugbank
L-Pyroglutamic acid（5-oxoproline）	P5CR2	Q4W8W1	Not Available	unknown	Drugbank
L-Pyroglutamic acid（5-oxoproline）	P5CR2	Q4W8W1	Not Available	unknown	Drugbank
L-Pyroglutamic acid（5-oxoproline）	PYCRL	Q53H96	Not Available	unknown	Drugbank
L-Pyroglutamic acid（5-oxoproline）	PYCRL	Q53H96	Not Available	unknown	Drugbank
L-Pyroglutamic acid（5-oxoproline）	KAP5.2	Q701N4	Not Available	unknown	Drugbank
L-Pyroglutamic acid（5-oxoproline）	KAP5.2	Q701N4	Not Available	unknown	Drugbank
L-Pyroglutamic acid（5-oxoproline）	PARS2	Q7L3T8	Not Available	unknown	Drugbank
L-Pyroglutamic acid（5-oxoproline）	PARS2	Q7L3T8	Not Available	unknown	Drugbank
L-Pyroglutamic acid（5-oxoproline）	PAT1	Q7Z2H8	Not Available	unknown	Drugbank
L-Pyroglutamic acid（5-oxoproline）	PAT1	Q7Z2H8	Not Available	unknown	Drugbank
L-Pyroglutamic acid（5-oxoproline）	LEPREL1	Q8IVL5	Not Available	unknown	Drugbank
L-Pyroglutamic acid（5-oxoproline）	LEPREL1	Q8IVL5	Not Available	unknown	Drugbank
L-Pyroglutamic acid（5-oxoproline）	LEPREL2	Q8IVL6	Not Available	unknown	Drugbank
L-Pyroglutamic acid（5-oxoproline）	LEPREL2	Q8IVL6	Not Available	unknown	Drugbank
L-Pyroglutamic acid（5-oxoproline）	MCT10	Q8TF71	Not Available	unknown	Drugbank
L-Pyroglutamic acid（5-oxoproline）	MCT10	Q8TF71	Not Available	unknown	Drugbank
L-Pyroglutamic acid（5-oxoproline）	PYCR2	Q96C36	Not Available	unknown	Drugbank
L-Pyroglutamic acid（5-oxoproline）	PYCR2	Q96C36	Not Available	unknown	Drugbank
L-Pyroglutamic acid（5-oxoproline）	C14orf149	Q96EM0	Not Available	unknown	Drugbank
L-Pyroglutamic acid（5-oxoproline）	C14orf149	Q96EM0	Not Available	unknown	Drugbank
L-Pyroglutamic acid（5-oxoproline）	PROT	Q99884	Not Available	unknown	Drugbank
L-Pyroglutamic acid（5-oxoproline）	PROT	Q99884	Not Available	unknown	Drugbank
L-Pyroglutamic acid（5-oxoproline）	ADAM23	Q9UKQ2	Not Available	unknown	Drugbank
L-Pyroglutamic acid（5-oxoproline）	ADAM23	Q9UKQ2	Not Available	unknown	Drugbank
L-Pyroglutamic acid（5-oxoproline）	SLC6A14	Q9UN76	Not Available	unknown	Drugbank
L-Pyroglutamic acid（5-oxoproline）	SLC6A14	Q9UN76	Not Available	unknown	Drugbank
L-Pyroglutamic acid（5-oxoproline）	OPLAH	O14841	0.972	catalysis	Stitch
L-Pyroglutamic acid（5-oxoproline）	GGCT	O75223	0.967	catalysis	Stitch
L-Pyroglutamic acid（5-oxoproline）	A2LD1	Q9BVM4	0.943	binding	Stitch
L-Pyroglutamic acid（5-oxoproline）	CCL8	P80075	0.911	binding	Stitch
L-Pyroglutamic acid（5-oxoproline）	AMY1C	P04745	0.908	binding	Stitch
L-Pyroglutamic acid（5-oxoproline）	AMY2A	P04746	0.908	binding	Stitch
L-Pyroglutamic acid（5-oxoproline）	GGT2	P36268	0.907	unknown	Stitch
L-Pyroglutamic acid（5-oxoproline）	GGT6	Q6P531	0.907	unknown	Stitch
L-Pyroglutamic acid（5-oxoproline）	GGT7	Q9UJ14	0.907	unknown	Stitch
L-Pyroglutamic acid（5-oxoproline）	IGHV6-1	A0A0B4J1U7	0.9	binding	Stitch
L-Pyroglutamic acid（5-oxoproline）	IGKV1-17	A0A0B4J1Z4	0.9	binding	Stitch
L-Pyroglutamic acid（5-oxoproline）	IGHV2-70	A0A0B4J2H3	0.9	binding	Stitch
L-Pyroglutamic acid（5-oxoproline）	SIRPB1	O00241	0.9	binding	Stitch
L-Pyroglutamic acid（5-oxoproline）	IGHG1	P01857	0.9	binding	Stitch
L-Pyroglutamic acid（5-oxoproline）	IGHM	P01871	0.9	binding	Stitch
L-Pyroglutamic acid（5-oxoproline）	ORM1	P02763	0.9	binding	Stitch
L-Pyroglutamic acid（5-oxoproline）	ANG	P03950	0.9	binding	Stitch
L-Pyroglutamic acid（5-oxoproline）	RLN2	P04090	0.9	binding	Stitch
L-Pyroglutamic acid（5-oxoproline）	IGLC1	P0CG04	0.9	binding	Stitch
L-Pyroglutamic acid（5-oxoproline）	IGLC2	P0CG05	0.9	binding	Stitch
L-Pyroglutamic acid（5-oxoproline）	PIP	P12273	0.9	binding	Stitch
L-Pyroglutamic acid（5-oxoproline）	AZGP1	P25311	0.9	binding	Stitch
L-Pyroglutamic acid（5-oxoproline）	IL13	P35225	0.9	binding	Stitch
L-Pyroglutamic acid（5-oxoproline）	GCLC	P48506	0.9	unknown	Stitch
L-Pyroglutamic acid（5-oxoproline）	GCLM	P48507	0.9	unknown	Stitch
L-Pyroglutamic acid（5-oxoproline）	CD47	Q08722	0.9	binding	Stitch
L-Pyroglutamic acid（5-oxoproline）	MSLN	Q13421	0.9	binding	Stitch
L-Pyroglutamic acid（5-oxoproline）	IGK@	Q6PJF2	0.9	binding	Stitch
L-Pyroglutamic acid（5-oxoproline）	ACO2	Q99798	0.836	binding	Stitch
L-Pyroglutamic acid（5-oxoproline）	IGLL5	B9A064	0.804	binding	Stitch
L-Pyroglutamic acid（5-oxoproline）	GSS	P48637	0.727	unknown	Stitch
L-Pyroglutamic acid（5-oxoproline）	QPCT	Q16769	0.623	unknown	Stitch
L-Pyroglutamic acid（5-oxoproline）	IGKV2-28	A0A075B6P5	0.573	unknown	Stitch
L-Pyroglutamic acid（5-oxoproline）	IGKV2D-28	A0A075B6P5	0.573	unknown	Stitch
L-Pyroglutamic acid（5-oxoproline）	IGKV2D-24	A0A075B6R9	0.474	unknown	Stitch
L-Pyroglutamic acid（5-oxoproline）	IGKV2-30	A0A075B6S3	0.474	unknown	Stitch
L-Pyroglutamic acid（5-oxoproline）	IGKV2D-30	A0A075B6S6	0.474	unknown	Stitch
L-Pyroglutamic acid（5-oxoproline）	IGKV2-24	A0A0C4DH68	0.474	unknown	Stitch
L-Pyroglutamic acid（5-oxoproline）	ALDH18A1	P54886	0.441	binding	Stitch
L-Pyroglutamic acid（5-oxoproline）	BACE1	P56817	0.423	unknown	Stitch
margaric acid	TLR4	O00206	Not Available	unknown	Drugbank
margaric acid	TLR4	O00206	Not Available	unknown	Drugbank
margaric acid	BET3	O43617	Not Available	unknown	Drugbank
margaric acid	BET3	O43617	Not Available	unknown	Drugbank
margaric acid	GNT1	O60656	Not Available	unknown	Drugbank
margaric acid	SCN2B	O60939	Not Available	unknown	Drugbank
margaric acid	DRS1	O75521	Not Available	unknown	Drugbank
margaric acid	C22orf6	O76054	Not Available	unknown	Drugbank
margaric acid	OCTN2	O76082	Not Available	unknown	Drugbank
margaric acid	APOM	O95445	Not Available	unknown	Drugbank
margaric acid	ABL	P00519	Not Available	unknown	Drugbank
margaric acid	LALBA	P00709	Not Available	unknown	Drugbank
margaric acid	PLG	P00747	Not Available	unknown	Drugbank
margaric acid	PLAT	P00750	Not Available	unknown	Drugbank
margaric acid	INS	P01308	Not Available	unknown	Drugbank
margaric acid	IGHG1	P01857	Not Available	unknown	Drugbank
margaric acid	PMP2	P02689	Not Available	unknown	Drugbank
margaric acid	ALB	P02768	Not Available	unknown	Drugbank
margaric acid	ALB	P02768	Not Available	unknown	Drugbank
margaric acid	ALB	P02768	Not Available	unknown	Drugbank
margaric acid	PLA2	P04054	Not Available	unknown	Drugbank
margaric acid	PLA2	P04054	Not Available	unknown	Drugbank
margaric acid	S100B	P04271	Not Available	unknown	Drugbank
margaric acid	CYP1A2	P05177	Not Available	unknown	Drugbank
margaric acid	FABP11	P05413	Not Available	unknown	Drugbank
margaric acid	FABP11	P05413	Not Available	unknown	Drugbank
margaric acid	OPN2	P08100	Not Available	unknown	Drugbank
margaric acid	LPA	P08519	Not Available	unknown	Drugbank
margaric acid	CYP3A3	P08684	Not Available	unknown	Drugbank
margaric acid	PAEP	P09466	Not Available	unknown	Drugbank
margaric acid	PAEP	P09466	Not Available	unknown	Drugbank
margaric acid	FUR	P09958	Not Available	unknown	Drugbank
margaric acid	CYP2C8	P10632	Not Available	unknown	Drugbank
margaric acid	CYP2C8	P10632	Not Available	unknown	Drugbank
margaric acid	CYP2A3	P11509	Not Available	unknown	Drugbank
margaric acid	CYP2C10	P11712	Not Available	unknown	Drugbank
margaric acid	ADH5	P11766	Not Available	unknown	Drugbank
margaric acid	FABP2	P12104	Not Available	unknown	Drugbank
margaric acid	FABP2	P12104	Not Available	unknown	Drugbank
margaric acid	ALAD	P13716	Not Available	unknown	Drugbank
margaric acid	ALAD	P13716	Not Available	unknown	Drugbank
margaric acid	ALAD	P13716	Not Available	unknown	Drugbank
margaric acid	PLA2B	P14555	Not Available	unknown	Drugbank
margaric acid	TYR	P14679	Not Available	unknown	Drugbank
margaric acid	FABP4	P15090	Not Available	unknown	Drugbank
margaric acid	PVR	P15151	Not Available	unknown	Drugbank
margaric acid	UGT2B7	P16662	Not Available	unknown	Drugbank
margaric acid	PKACA	P17612	Not Available	unknown	Drugbank
margaric acid	GM2A	P17900	Not Available	unknown	Drugbank
margaric acid	GNT1	P19224	Not Available	unknown	Drugbank
margaric acid	CYP2B6	P20813	Not Available	unknown	Drugbank
margaric acid	CYP3A5	P20815	Not Available	unknown	Drugbank
margaric acid	GNT1	P22310	Not Available	unknown	Drugbank
margaric acid	COX1	P23219	Not Available	unknown	Drugbank
margaric acid	SRD5A2	P31213	Not Available	unknown	Drugbank
margaric acid	CYP2C18	P33260	Not Available	unknown	Drugbank
margaric acid	CYP2C19	P33261	Not Available	unknown	Drugbank
margaric acid	RCV1	P35243	Not Available	unknown	Drugbank
margaric acid	NAC1	P35498	Not Available	unknown	Drugbank
margaric acid	SCN4A	P35499	Not Available	unknown	Drugbank
margaric acid	GNT1	P35503	Not Available	unknown	Drugbank
margaric acid	HNF4	P41235	Not Available	unknown	Drugbank
margaric acid	C6orf131	P43080	Not Available	unknown	Drugbank
margaric acid	ACADSB	P45954	Not Available	unknown	Drugbank
margaric acid	PPT	P50897	Not Available	unknown	Drugbank
margaric acid	ALDH5A1	P51649	Not Available	unknown	Drugbank
margaric acid	AKR1D1	P51857	Not Available	unknown	Drugbank
margaric acid	MCT1	P53985	Not Available	unknown	Drugbank
margaric acid	UGT2B15	P54855	Not Available	unknown	Drugbank
margaric acid	PKIA	P61925	Not Available	unknown	Drugbank
margaric acid	CALM	P62158	Not Available	unknown	Drugbank
margaric acid	ARF6	P62330	Not Available	unknown	Drugbank
margaric acid	FKBP1	P62942	Not Available	unknown	Drugbank
margaric acid	CNA2	P63098	Not Available	unknown	Drugbank
margaric acid	HBB	P68871	Not Available	unknown	Drugbank
margaric acid	HBA1	P69905	Not Available	unknown	Drugbank
margaric acid	HNL	P80188	Not Available	unknown	Drugbank
margaric acid	ABAT	P80404	Not Available	unknown	Drugbank
margaric acid	ARF1	P84077	Not Available	unknown	Drugbank
margaric acid	SCN6A	Q01118	Not Available	unknown	Drugbank
margaric acid	FABP5	Q01469	Not Available	unknown	Drugbank
margaric acid	OGDH	Q02218	Not Available	unknown	Drugbank
margaric acid	AO	Q06278	Not Available	unknown	Drugbank
margaric acid	SCN1B	Q07699	Not Available	unknown	Drugbank
margaric acid	CALNA	Q08209	Not Available	unknown	Drugbank
margaric acid	SCN5A	Q14524	Not Available	unknown	Drugbank
margaric acid	HNF4G	Q14541	Not Available	unknown	Drugbank
margaric acid	ACOX	Q15067	Not Available	unknown	Drugbank
margaric acid	BHLHE74	Q15788	Not Available	unknown	Drugbank
margaric acid	NENA	Q15858	Not Available	unknown	Drugbank
margaric acid	OAT1	Q4U2R8	Not Available	unknown	Drugbank
margaric acid	OAT1	Q4U2R8	Not Available	unknown	Drugbank
margaric acid	OAT1	Q4U2R8	Not Available	unknown	Drugbank
margaric acid	SCN4B	Q8IWT1	Not Available	unknown	Drugbank
margaric acid	OAT3	Q8TCC7	Not Available	unknown	Drugbank
margaric acid	OAT3	Q8TCC7	Not Available	unknown	Drugbank
margaric acid	OAT3	Q8TCC7	Not Available	unknown	Drugbank
margaric acid	HDAC2	Q92769	Not Available	unknown	Drugbank
margaric acid	NAC2	Q99250	Not Available	unknown	Drugbank
margaric acid	GNT1	Q9HAW8	Not Available	unknown	Drugbank
margaric acid	GNT1	Q9HAW9	Not Available	unknown	Drugbank
margaric acid	OAT4	Q9NSA0	Not Available	unknown	Drugbank
margaric acid	OAT4	Q9NSA0	Not Available	unknown	Drugbank
margaric acid	KIAA1356	Q9NY46	Not Available	unknown	Drugbank
margaric acid	KIAA1158	Q9NY72	Not Available	unknown	Drugbank
margaric acid	GLTP	Q9NZD2	Not Available	unknown	Drugbank
margaric acid	PLA2G2E	Q9NZK7	Not Available	unknown	Drugbank
margaric acid	SCN11A	Q9UI33	Not Available	unknown	Drugbank
margaric acid	GOX1	Q9UJM8	Not Available	unknown	Drugbank
margaric acid	HDAC7	Q9UKV0	Not Available	unknown	Drugbank
margaric acid	PLA2G2D	Q9UNK4	Not Available	unknown	Drugbank
margaric acid	MED	Q9UQD0	Not Available	unknown	Drugbank
margaric acid	SCN10A	Q9Y5Y9	Not Available	unknown	Drugbank
margaric acid	NLT	Q9Y694	Not Available	unknown	Drugbank
margaric acid	NLT	Q9Y694	Not Available	unknown	Drugbank
margaric acid	ESOP1	Q9Y6Y9	Not Available	unknown	Drugbank
margaric acid	ESOP1	Q9Y6Y9	Not Available	unknown	Drugbank
margaric acid	CAT	P04040	0.551	unknown	Stitch
Melittoside	YWHAE	P62258	Not Available	unknown	Drugbank
methyl 9,10-methylene-hexadecanoate	IGHG1	P01857	Not Available	unknown	Drugbank
methyl 9,10-methylene-hexadecanoate	S100B	P04271	Not Available	unknown	Drugbank
methyl 9,10-methylene-hexadecanoate	HNL	P80188	Not Available	unknown	Drugbank
METHYL PALMITOLEATE	BLBP	O15540	Not Available	unknown	Drugbank
METHYL PALMITOLEATE	BLBP	O15540	Not Available	unknown	Drugbank
METHYL PALMITOLEATE	BLBP	O15540	Not Available	unknown	Drugbank
METHYL PALMITOLEATE	FADS1	O60427	Not Available	unknown	Drugbank
METHYL PALMITOLEATE	FADS2	O95864	Not Available	unknown	Drugbank
METHYL PALMITOLEATE	F12	P00748	Not Available	unknown	Drugbank
METHYL PALMITOLEATE	IGHG1	P01857	Not Available	unknown	Drugbank
METHYL PALMITOLEATE	PMP2	P02689	Not Available	unknown	Drugbank
METHYL PALMITOLEATE	ALB	P02768	Not Available	unknown	Drugbank
METHYL PALMITOLEATE	ALB	P02768	Not Available	unknown	Drugbank
METHYL PALMITOLEATE	GC	P02774	Not Available	unknown	Drugbank
METHYL PALMITOLEATE	FABP11	P05413	Not Available	unknown	Drugbank
METHYL PALMITOLEATE	FABP1	P07148	Not Available	unknown	Drugbank
METHYL PALMITOLEATE	FABP2	P12104	Not Available	unknown	Drugbank
METHYL PALMITOLEATE	FABP4	P15090	Not Available	unknown	Drugbank
METHYL PALMITOLEATE	FABP4	P15090	Not Available	unknown	Drugbank
METHYL PALMITOLEATE	COX1	P23219	Not Available	unknown	Drugbank
METHYL PALMITOLEATE	COX1	P23219	Not Available	unknown	Drugbank
METHYL PALMITOLEATE	CNC	P32418	Not Available	unknown	Drugbank
METHYL PALMITOLEATE	COX2	P35354	Not Available	unknown	Drugbank
METHYL PALMITOLEATE	HNL	P80188	Not Available	unknown	Drugbank
METHYL PALMITOLEATE	NR1C2	Q03181	Not Available	unknown	Drugbank
METHYL PALMITOLEATE	TRPV1	Q8NER1	Not Available	unknown	Drugbank
METHYL PALMITOLEATE	OATP2A1	Q92959	Not Available	unknown	Drugbank
METHYL PALMITOLEATE	APH1A	Q96BI3	Not Available	unknown	Drugbank
METHYL PALMITOLEATE	ELOVL4	Q9GZR5	Not Available	unknown	Drugbank
METHYL PALMITOLEATE	MDS033	Q9NZ42	Not Available	unknown	Drugbank
METHYL PALMITOLEATE	GLTP	Q9NZD2	Not Available	unknown	Drugbank
myristic acid	TLR4	O00206	Not Available	unknown	Drugbank
myristic acid	TLR4	O00206	Not Available	unknown	Drugbank
myristic acid	BET3	O43617	Not Available	unknown	Drugbank
myristic acid	BET3	O43617	Not Available	unknown	Drugbank
myristic acid	GNT1	O60656	Not Available	unknown	Drugbank
myristic acid	SCN2B	O60939	Not Available	unknown	Drugbank
myristic acid	DRS1	O75521	Not Available	unknown	Drugbank
myristic acid	C22orf6	O76054	Not Available	unknown	Drugbank
myristic acid	OCTN2	O76082	Not Available	unknown	Drugbank
myristic acid	APOM	O95445	Not Available	unknown	Drugbank
myristic acid	ABL	P00519	Not Available	unknown	Drugbank
myristic acid	LALBA	P00709	Not Available	unknown	Drugbank
myristic acid	PLG	P00747	Not Available	unknown	Drugbank
myristic acid	PLAT	P00750	Not Available	unknown	Drugbank
myristic acid	INS	P01308	Not Available	unknown	Drugbank
myristic acid	IGHG1	P01857	Not Available	unknown	Drugbank
myristic acid	PMP2	P02689	Not Available	unknown	Drugbank
myristic acid	ALB	P02768	Not Available	unknown	Drugbank
myristic acid	ALB	P02768	Not Available	unknown	Drugbank
myristic acid	ALB	P02768	Not Available	unknown	Drugbank
myristic acid	PLA2	P04054	Not Available	unknown	Drugbank
myristic acid	PLA2	P04054	Not Available	unknown	Drugbank
myristic acid	S100B	P04271	Not Available	unknown	Drugbank
myristic acid	CYP1A2	P05177	Not Available	unknown	Drugbank
myristic acid	FABP11	P05413	Not Available	unknown	Drugbank
myristic acid	FABP11	P05413	Not Available	unknown	Drugbank
myristic acid	OPN2	P08100	Not Available	unknown	Drugbank
myristic acid	LPA	P08519	Not Available	unknown	Drugbank
myristic acid	CYP3A3	P08684	Not Available	unknown	Drugbank
myristic acid	PAEP	P09466	Not Available	unknown	Drugbank
myristic acid	PAEP	P09466	Not Available	unknown	Drugbank
myristic acid	FUR	P09958	Not Available	unknown	Drugbank
myristic acid	CYP2C8	P10632	Not Available	unknown	Drugbank
myristic acid	CYP2C8	P10632	Not Available	unknown	Drugbank
myristic acid	CYP2A3	P11509	Not Available	unknown	Drugbank
myristic acid	CYP2C10	P11712	Not Available	unknown	Drugbank
myristic acid	ADH5	P11766	Not Available	unknown	Drugbank
myristic acid	FABP2	P12104	Not Available	unknown	Drugbank
myristic acid	FABP2	P12104	Not Available	unknown	Drugbank
myristic acid	ALAD	P13716	Not Available	unknown	Drugbank
myristic acid	ALAD	P13716	Not Available	unknown	Drugbank
myristic acid	ALAD	P13716	Not Available	unknown	Drugbank
myristic acid	PLA2B	P14555	Not Available	unknown	Drugbank
myristic acid	TYR	P14679	Not Available	unknown	Drugbank
myristic acid	FABP4	P15090	Not Available	unknown	Drugbank
myristic acid	PVR	P15151	Not Available	unknown	Drugbank
myristic acid	UGT2B7	P16662	Not Available	unknown	Drugbank
myristic acid	PKACA	P17612	Not Available	unknown	Drugbank
myristic acid	GM2A	P17900	Not Available	unknown	Drugbank
myristic acid	GNT1	P19224	Not Available	unknown	Drugbank
myristic acid	CYP2B6	P20813	Not Available	unknown	Drugbank
myristic acid	CYP3A5	P20815	Not Available	unknown	Drugbank
myristic acid	GNT1	P22310	Not Available	unknown	Drugbank
myristic acid	COX1	P23219	Not Available	unknown	Drugbank
myristic acid	SRD5A2	P31213	Not Available	unknown	Drugbank
myristic acid	CYP2C18	P33260	Not Available	unknown	Drugbank
myristic acid	CYP2C19	P33261	Not Available	unknown	Drugbank
myristic acid	RCV1	P35243	Not Available	unknown	Drugbank
myristic acid	NAC1	P35498	Not Available	unknown	Drugbank
myristic acid	SCN4A	P35499	Not Available	unknown	Drugbank
myristic acid	GNT1	P35503	Not Available	unknown	Drugbank
myristic acid	HNF4	P41235	Not Available	unknown	Drugbank
myristic acid	C6orf131	P43080	Not Available	unknown	Drugbank
myristic acid	ACADSB	P45954	Not Available	unknown	Drugbank
myristic acid	PPT	P50897	Not Available	unknown	Drugbank
myristic acid	ALDH5A1	P51649	Not Available	unknown	Drugbank
myristic acid	AKR1D1	P51857	Not Available	unknown	Drugbank
myristic acid	MCT1	P53985	Not Available	unknown	Drugbank
myristic acid	UGT2B15	P54855	Not Available	unknown	Drugbank
myristic acid	PKIA	P61925	Not Available	unknown	Drugbank
myristic acid	CALM	P62158	Not Available	unknown	Drugbank
myristic acid	ARF6	P62330	Not Available	unknown	Drugbank
myristic acid	FKBP1	P62942	Not Available	unknown	Drugbank
myristic acid	CNA2	P63098	Not Available	unknown	Drugbank
myristic acid	HBB	P68871	Not Available	unknown	Drugbank
myristic acid	HBA1	P69905	Not Available	unknown	Drugbank
myristic acid	HNL	P80188	Not Available	unknown	Drugbank
myristic acid	ABAT	P80404	Not Available	unknown	Drugbank
myristic acid	ARF1	P84077	Not Available	unknown	Drugbank
myristic acid	SCN6A	Q01118	Not Available	unknown	Drugbank
myristic acid	FABP5	Q01469	Not Available	unknown	Drugbank
myristic acid	OGDH	Q02218	Not Available	unknown	Drugbank
myristic acid	AO	Q06278	Not Available	unknown	Drugbank
myristic acid	SCN1B	Q07699	Not Available	unknown	Drugbank
myristic acid	CALNA	Q08209	Not Available	unknown	Drugbank
myristic acid	SCN5A	Q14524	Not Available	unknown	Drugbank
myristic acid	HNF4G	Q14541	Not Available	unknown	Drugbank
myristic acid	ACOX	Q15067	Not Available	unknown	Drugbank
myristic acid	BHLHE74	Q15788	Not Available	unknown	Drugbank
myristic acid	NENA	Q15858	Not Available	unknown	Drugbank
myristic acid	OAT1	Q4U2R8	Not Available	unknown	Drugbank
myristic acid	OAT1	Q4U2R8	Not Available	unknown	Drugbank
myristic acid	OAT1	Q4U2R8	Not Available	unknown	Drugbank
myristic acid	SCN4B	Q8IWT1	Not Available	unknown	Drugbank
myristic acid	OAT3	Q8TCC7	Not Available	unknown	Drugbank
myristic acid	OAT3	Q8TCC7	Not Available	unknown	Drugbank
myristic acid	OAT3	Q8TCC7	Not Available	unknown	Drugbank
myristic acid	HDAC2	Q92769	Not Available	unknown	Drugbank
myristic acid	NAC2	Q99250	Not Available	unknown	Drugbank
myristic acid	GNT1	Q9HAW8	Not Available	unknown	Drugbank
myristic acid	GNT1	Q9HAW9	Not Available	unknown	Drugbank
myristic acid	OAT4	Q9NSA0	Not Available	unknown	Drugbank
myristic acid	OAT4	Q9NSA0	Not Available	unknown	Drugbank
myristic acid	KIAA1356	Q9NY46	Not Available	unknown	Drugbank
myristic acid	KIAA1158	Q9NY72	Not Available	unknown	Drugbank
myristic acid	GLTP	Q9NZD2	Not Available	unknown	Drugbank
myristic acid	PLA2G2E	Q9NZK7	Not Available	unknown	Drugbank
myristic acid	SCN11A	Q9UI33	Not Available	unknown	Drugbank
myristic acid	GOX1	Q9UJM8	Not Available	unknown	Drugbank
myristic acid	HDAC7	Q9UKV0	Not Available	unknown	Drugbank
myristic acid	PLA2G2D	Q9UNK4	Not Available	unknown	Drugbank
myristic acid	MED	Q9UQD0	Not Available	unknown	Drugbank
myristic acid	SCN10A	Q9Y5Y9	Not Available	unknown	Drugbank
myristic acid	NLT	Q9Y694	Not Available	unknown	Drugbank
myristic acid	NLT	Q9Y694	Not Available	unknown	Drugbank
myristic acid	ESOP1	Q9Y6Y9	Not Available	unknown	Drugbank
myristic acid	ESOP1	Q9Y6Y9	Not Available	unknown	Drugbank
myristic acid	ALB	P02768	0.985	binding	Stitch
myristic acid	INS	P01308	0.983	binding	Stitch
myristic acid	CALM2	H0Y7A7	0.982	inhibition	Stitch
myristic acid	TLR4	O00206	0.982	binding	Stitch
myristic acid	ABL1	P00519	0.981	binding	Stitch
myristic acid	LY96	Q9Y6Y9	0.981	binding	Stitch
myristic acid	PVR	P15151	0.979	binding	Stitch
myristic acid	GM2A	P17900	0.979	binding	Stitch
myristic acid	HNF4A	P41235	0.979	binding	Stitch
myristic acid	TRAPPC3	O43617	0.967	binding	Stitch
myristic acid	FABP2	P12104	0.967	binding	Stitch
myristic acid	PRKACA	P17612	0.967	binding	Stitch
myristic acid	PPP3CA	Q08209	0.966	binding	Stitch
myristic acid	GUCA1A	P43080	0.963	binding	Stitch
myristic acid	PPP3R1	P63098	0.942	binding	Stitch
myristic acid	FKBP1A	P62942	0.933	binding	Stitch
myristic acid	GCG	P01275	0.908	activation	Stitch
myristic acid	PPARG	P37231	0.908	binding	Stitch
myristic acid	PCSK1	P29120	0.904	unknown	Stitch
myristic acid	ACOT2	P49753	0.904	catalysis	Stitch
myristic acid	ACOT1	Q86TX2	0.904	catalysis	Stitch
myristic acid	ACOT4	Q8N9L9	0.904	catalysis	Stitch
myristic acid	ACOT7	O00154	0.9	catalysis	Stitch
myristic acid	APOM	O95445	0.9	binding	Stitch
myristic acid	GPR120	Q5NUL3	0.9	binding	Stitch
myristic acid	RCVRN	P35243	0.886	binding	Stitch
myristic acid	ARF1	P84077	0.885	binding	Stitch
myristic acid	PECI	A0A024QZU5	0.859	binding	Stitch
myristic acid	NMT1	P30419	0.847	unknown	Stitch
myristic acid	MSRA	Q9UJ68	0.844	binding	Stitch
myristic acid	FYN	P06241	0.843	activation	Stitch
myristic acid	PAEP	P09466	0.836	binding	Stitch
myristic acid	FASN	P49327	0.835	inhibition	Stitch
myristic acid	ARF6	P62330	0.834	binding	Stitch
myristic acid	DECR1	Q16698	0.833	activation	Stitch
myristic acid	CALM3	B4DJ51	0.831	inhibition	Stitch
myristic acid	IL2	P60568	0.831	activation	Stitch
myristic acid	CALM1	P62158	0.831	inhibition	Stitch
myristic acid	NOS3	P29474	0.823	activation	Stitch
myristic acid	PKIA	P61925	0.8	binding	Stitch
myristic acid	NCOA1	Q15788	0.8	binding	Stitch
myristic acid	NMT2	O60551	0.797	unknown	Stitch
myristic acid	CYP4Z1	Q86W10	0.725	inhibition	Stitch
myristic acid	PPP3R2	Q96LZ3	0.718	binding	Stitch
myristic acid	PRKACB	P22694	0.708	binding	Stitch
myristic acid	FKBP1C	Q5VVH2	0.679	binding	Stitch
myristic acid	ACSL3	O95573	0.589	unknown	Stitch
myristic acid	MBOAT4	Q96T53	0.522	unknown	Stitch
myristic acid	PPP3CB	P16298	0.518	binding	Stitch
myristic acid	PPP3CC	P48454	0.518	binding	Stitch
myristic acid	ACSL1	P33121	0.489	unknown	Stitch
myristic acid	GPBAR1	Q8TDU6	0.468	binding	Stitch
myristic acid	FKBP1B	P68106	0.467	binding	Stitch
myristic acid	HPCAL1	P37235	0.453	binding	Stitch
myristic acid	NCALD	P61601	0.453	binding	Stitch
myristic acid	NCS1	P62166	0.453	binding	Stitch
myristic acid	BET3L	Q5T215	0.431	binding	Stitch
nonadecanOic acid	TLR4	O00206	Not Available	unknown	Drugbank
nonadecanOic acid	TLR4	O00206	Not Available	unknown	Drugbank
nonadecanOic acid	BET3	O43617	Not Available	unknown	Drugbank
nonadecanOic acid	BET3	O43617	Not Available	unknown	Drugbank
nonadecanOic acid	GNT1	O60656	Not Available	unknown	Drugbank
nonadecanOic acid	SCN2B	O60939	Not Available	unknown	Drugbank
nonadecanOic acid	DRS1	O75521	Not Available	unknown	Drugbank
nonadecanOic acid	C22orf6	O76054	Not Available	unknown	Drugbank
nonadecanOic acid	OCTN2	O76082	Not Available	unknown	Drugbank
nonadecanOic acid	APOM	O95445	Not Available	unknown	Drugbank
nonadecanOic acid	ABL	P00519	Not Available	unknown	Drugbank
nonadecanOic acid	LALBA	P00709	Not Available	unknown	Drugbank
nonadecanOic acid	PLG	P00747	Not Available	unknown	Drugbank
nonadecanOic acid	PLAT	P00750	Not Available	unknown	Drugbank
nonadecanOic acid	INS	P01308	Not Available	unknown	Drugbank
nonadecanOic acid	IGHG1	P01857	Not Available	unknown	Drugbank
nonadecanOic acid	PMP2	P02689	Not Available	unknown	Drugbank
nonadecanOic acid	ALB	P02768	Not Available	unknown	Drugbank
nonadecanOic acid	ALB	P02768	Not Available	unknown	Drugbank
nonadecanOic acid	ALB	P02768	Not Available	unknown	Drugbank
nonadecanOic acid	PLA2	P04054	Not Available	unknown	Drugbank
nonadecanOic acid	PLA2	P04054	Not Available	unknown	Drugbank
nonadecanOic acid	S100B	P04271	Not Available	unknown	Drugbank
nonadecanOic acid	CYP1A2	P05177	Not Available	unknown	Drugbank
nonadecanOic acid	FABP11	P05413	Not Available	unknown	Drugbank
nonadecanOic acid	FABP11	P05413	Not Available	unknown	Drugbank
nonadecanOic acid	OPN2	P08100	Not Available	unknown	Drugbank
nonadecanOic acid	LPA	P08519	Not Available	unknown	Drugbank
nonadecanOic acid	CYP3A3	P08684	Not Available	unknown	Drugbank
nonadecanOic acid	PAEP	P09466	Not Available	unknown	Drugbank
nonadecanOic acid	PAEP	P09466	Not Available	unknown	Drugbank
nonadecanOic acid	FUR	P09958	Not Available	unknown	Drugbank
nonadecanOic acid	CYP2C8	P10632	Not Available	unknown	Drugbank
nonadecanOic acid	CYP2C8	P10632	Not Available	unknown	Drugbank
nonadecanOic acid	CYP2A3	P11509	Not Available	unknown	Drugbank
nonadecanOic acid	CYP2C10	P11712	Not Available	unknown	Drugbank
nonadecanOic acid	ADH5	P11766	Not Available	unknown	Drugbank
nonadecanOic acid	FABP2	P12104	Not Available	unknown	Drugbank
nonadecanOic acid	FABP2	P12104	Not Available	unknown	Drugbank
nonadecanOic acid	ALAD	P13716	Not Available	unknown	Drugbank
nonadecanOic acid	ALAD	P13716	Not Available	unknown	Drugbank
nonadecanOic acid	ALAD	P13716	Not Available	unknown	Drugbank
nonadecanOic acid	PLA2B	P14555	Not Available	unknown	Drugbank
nonadecanOic acid	TYR	P14679	Not Available	unknown	Drugbank
nonadecanOic acid	FABP4	P15090	Not Available	unknown	Drugbank
nonadecanOic acid	PVR	P15151	Not Available	unknown	Drugbank
nonadecanOic acid	UGT2B7	P16662	Not Available	unknown	Drugbank
nonadecanOic acid	PKACA	P17612	Not Available	unknown	Drugbank
nonadecanOic acid	GM2A	P17900	Not Available	unknown	Drugbank
nonadecanOic acid	GNT1	P19224	Not Available	unknown	Drugbank
nonadecanOic acid	CYP2B6	P20813	Not Available	unknown	Drugbank
nonadecanOic acid	CYP3A5	P20815	Not Available	unknown	Drugbank
nonadecanOic acid	GNT1	P22310	Not Available	unknown	Drugbank
nonadecanOic acid	COX1	P23219	Not Available	unknown	Drugbank
nonadecanOic acid	SRD5A2	P31213	Not Available	unknown	Drugbank
nonadecanOic acid	CYP2C18	P33260	Not Available	unknown	Drugbank
nonadecanOic acid	CYP2C19	P33261	Not Available	unknown	Drugbank
nonadecanOic acid	RCV1	P35243	Not Available	unknown	Drugbank
nonadecanOic acid	NAC1	P35498	Not Available	unknown	Drugbank
nonadecanOic acid	SCN4A	P35499	Not Available	unknown	Drugbank
nonadecanOic acid	GNT1	P35503	Not Available	unknown	Drugbank
nonadecanOic acid	HNF4	P41235	Not Available	unknown	Drugbank
nonadecanOic acid	C6orf131	P43080	Not Available	unknown	Drugbank
nonadecanOic acid	ACADSB	P45954	Not Available	unknown	Drugbank
nonadecanOic acid	PPT	P50897	Not Available	unknown	Drugbank
nonadecanOic acid	ALDH5A1	P51649	Not Available	unknown	Drugbank
nonadecanOic acid	AKR1D1	P51857	Not Available	unknown	Drugbank
nonadecanOic acid	MCT1	P53985	Not Available	unknown	Drugbank
nonadecanOic acid	UGT2B15	P54855	Not Available	unknown	Drugbank
nonadecanOic acid	PKIA	P61925	Not Available	unknown	Drugbank
nonadecanOic acid	CALM	P62158	Not Available	unknown	Drugbank
nonadecanOic acid	ARF6	P62330	Not Available	unknown	Drugbank
nonadecanOic acid	FKBP1	P62942	Not Available	unknown	Drugbank
nonadecanOic acid	CNA2	P63098	Not Available	unknown	Drugbank
nonadecanOic acid	HBB	P68871	Not Available	unknown	Drugbank
nonadecanOic acid	HBA1	P69905	Not Available	unknown	Drugbank
nonadecanOic acid	HNL	P80188	Not Available	unknown	Drugbank
nonadecanOic acid	ABAT	P80404	Not Available	unknown	Drugbank
nonadecanOic acid	ARF1	P84077	Not Available	unknown	Drugbank
nonadecanOic acid	SCN6A	Q01118	Not Available	unknown	Drugbank
nonadecanOic acid	FABP5	Q01469	Not Available	unknown	Drugbank
nonadecanOic acid	OGDH	Q02218	Not Available	unknown	Drugbank
nonadecanOic acid	AO	Q06278	Not Available	unknown	Drugbank
nonadecanOic acid	SCN1B	Q07699	Not Available	unknown	Drugbank
nonadecanOic acid	CALNA	Q08209	Not Available	unknown	Drugbank
nonadecanOic acid	SCN5A	Q14524	Not Available	unknown	Drugbank
nonadecanOic acid	HNF4G	Q14541	Not Available	unknown	Drugbank
nonadecanOic acid	ACOX	Q15067	Not Available	unknown	Drugbank
nonadecanOic acid	BHLHE74	Q15788	Not Available	unknown	Drugbank
nonadecanOic acid	NENA	Q15858	Not Available	unknown	Drugbank
nonadecanOic acid	OAT1	Q4U2R8	Not Available	unknown	Drugbank
nonadecanOic acid	OAT1	Q4U2R8	Not Available	unknown	Drugbank
nonadecanOic acid	OAT1	Q4U2R8	Not Available	unknown	Drugbank
nonadecanOic acid	SCN4B	Q8IWT1	Not Available	unknown	Drugbank
nonadecanOic acid	OAT3	Q8TCC7	Not Available	unknown	Drugbank
nonadecanOic acid	OAT3	Q8TCC7	Not Available	unknown	Drugbank
nonadecanOic acid	OAT3	Q8TCC7	Not Available	unknown	Drugbank
nonadecanOic acid	HDAC2	Q92769	Not Available	unknown	Drugbank
nonadecanOic acid	NAC2	Q99250	Not Available	unknown	Drugbank
nonadecanOic acid	GNT1	Q9HAW8	Not Available	unknown	Drugbank
nonadecanOic acid	GNT1	Q9HAW9	Not Available	unknown	Drugbank
nonadecanOic acid	OAT4	Q9NSA0	Not Available	unknown	Drugbank
nonadecanOic acid	OAT4	Q9NSA0	Not Available	unknown	Drugbank
nonadecanOic acid	KIAA1356	Q9NY46	Not Available	unknown	Drugbank
nonadecanOic acid	KIAA1158	Q9NY72	Not Available	unknown	Drugbank
nonadecanOic acid	GLTP	Q9NZD2	Not Available	unknown	Drugbank
nonadecanOic acid	PLA2G2E	Q9NZK7	Not Available	unknown	Drugbank
nonadecanOic acid	SCN11A	Q9UI33	Not Available	unknown	Drugbank
nonadecanOic acid	GOX1	Q9UJM8	Not Available	unknown	Drugbank
nonadecanOic acid	HDAC7	Q9UKV0	Not Available	unknown	Drugbank
nonadecanOic acid	PLA2G2D	Q9UNK4	Not Available	unknown	Drugbank
nonadecanOic acid	MED	Q9UQD0	Not Available	unknown	Drugbank
nonadecanOic acid	SCN10A	Q9Y5Y9	Not Available	unknown	Drugbank
nonadecanOic acid	NLT	Q9Y694	Not Available	unknown	Drugbank
nonadecanOic acid	NLT	Q9Y694	Not Available	unknown	Drugbank
nonadecanOic acid	ESOP1	Q9Y6Y9	Not Available	unknown	Drugbank
nonadecanOic acid	ESOP1	Q9Y6Y9	Not Available	unknown	Drugbank
nonadecanOic acid	N6AMT1	Q9Y5N5	0.523	unknown	Stitch
palmitic acid	TLR4	O00206	Not Available	unknown	Drugbank
palmitic acid	TLR4	O00206	Not Available	unknown	Drugbank
palmitic acid	BET3	O43617	Not Available	unknown	Drugbank
palmitic acid	BET3	O43617	Not Available	unknown	Drugbank
palmitic acid	GNT1	O60656	Not Available	unknown	Drugbank
palmitic acid	SCN2B	O60939	Not Available	unknown	Drugbank
palmitic acid	DRS1	O75521	Not Available	unknown	Drugbank
palmitic acid	C22orf6	O76054	Not Available	unknown	Drugbank
palmitic acid	OCTN2	O76082	Not Available	unknown	Drugbank
palmitic acid	APOM	O95445	Not Available	unknown	Drugbank
palmitic acid	ABL	P00519	Not Available	unknown	Drugbank
palmitic acid	LALBA	P00709	Not Available	unknown	Drugbank
palmitic acid	PLG	P00747	Not Available	unknown	Drugbank
palmitic acid	PLAT	P00750	Not Available	unknown	Drugbank
palmitic acid	INS	P01308	Not Available	unknown	Drugbank
palmitic acid	IGHG1	P01857	Not Available	unknown	Drugbank
palmitic acid	PMP2	P02689	Not Available	unknown	Drugbank
palmitic acid	ALB	P02768	Not Available	unknown	Drugbank
palmitic acid	ALB	P02768	Not Available	unknown	Drugbank
palmitic acid	ALB	P02768	Not Available	unknown	Drugbank
palmitic acid	PLA2	P04054	Not Available	unknown	Drugbank
palmitic acid	PLA2	P04054	Not Available	unknown	Drugbank
palmitic acid	S100B	P04271	Not Available	unknown	Drugbank
palmitic acid	CYP1A2	P05177	Not Available	unknown	Drugbank
palmitic acid	FABP11	P05413	Not Available	unknown	Drugbank
palmitic acid	FABP11	P05413	Not Available	unknown	Drugbank
palmitic acid	OPN2	P08100	Not Available	unknown	Drugbank
palmitic acid	LPA	P08519	Not Available	unknown	Drugbank
palmitic acid	CYP3A3	P08684	Not Available	unknown	Drugbank
palmitic acid	PAEP	P09466	Not Available	unknown	Drugbank
palmitic acid	PAEP	P09466	Not Available	unknown	Drugbank
palmitic acid	FUR	P09958	Not Available	unknown	Drugbank
palmitic acid	CYP2C8	P10632	Not Available	unknown	Drugbank
palmitic acid	CYP2C8	P10632	Not Available	unknown	Drugbank
palmitic acid	CYP2A3	P11509	Not Available	unknown	Drugbank
palmitic acid	CYP2C10	P11712	Not Available	unknown	Drugbank
palmitic acid	ADH5	P11766	Not Available	unknown	Drugbank
palmitic acid	FABP2	P12104	Not Available	unknown	Drugbank
palmitic acid	FABP2	P12104	Not Available	unknown	Drugbank
palmitic acid	ALAD	P13716	Not Available	unknown	Drugbank
palmitic acid	ALAD	P13716	Not Available	unknown	Drugbank
palmitic acid	ALAD	P13716	Not Available	unknown	Drugbank
palmitic acid	PLA2B	P14555	Not Available	unknown	Drugbank
palmitic acid	TYR	P14679	Not Available	unknown	Drugbank
palmitic acid	FABP4	P15090	Not Available	unknown	Drugbank
palmitic acid	PVR	P15151	Not Available	unknown	Drugbank
palmitic acid	UGT2B7	P16662	Not Available	unknown	Drugbank
palmitic acid	PKACA	P17612	Not Available	unknown	Drugbank
palmitic acid	GM2A	P17900	Not Available	unknown	Drugbank
palmitic acid	GNT1	P19224	Not Available	unknown	Drugbank
palmitic acid	CYP2B6	P20813	Not Available	unknown	Drugbank
palmitic acid	CYP3A5	P20815	Not Available	unknown	Drugbank
palmitic acid	GNT1	P22310	Not Available	unknown	Drugbank
palmitic acid	COX1	P23219	Not Available	unknown	Drugbank
palmitic acid	SRD5A2	P31213	Not Available	unknown	Drugbank
palmitic acid	CYP2C18	P33260	Not Available	unknown	Drugbank
palmitic acid	CYP2C19	P33261	Not Available	unknown	Drugbank
palmitic acid	RCV1	P35243	Not Available	unknown	Drugbank
palmitic acid	NAC1	P35498	Not Available	unknown	Drugbank
palmitic acid	SCN4A	P35499	Not Available	unknown	Drugbank
palmitic acid	GNT1	P35503	Not Available	unknown	Drugbank
palmitic acid	HNF4	P41235	Not Available	unknown	Drugbank
palmitic acid	C6orf131	P43080	Not Available	unknown	Drugbank
palmitic acid	ACADSB	P45954	Not Available	unknown	Drugbank
palmitic acid	PPT	P50897	Not Available	unknown	Drugbank
palmitic acid	ALDH5A1	P51649	Not Available	unknown	Drugbank
palmitic acid	AKR1D1	P51857	Not Available	unknown	Drugbank
palmitic acid	MCT1	P53985	Not Available	unknown	Drugbank
palmitic acid	UGT2B15	P54855	Not Available	unknown	Drugbank
palmitic acid	PKIA	P61925	Not Available	unknown	Drugbank
palmitic acid	CALM	P62158	Not Available	unknown	Drugbank
palmitic acid	ARF6	P62330	Not Available	unknown	Drugbank
palmitic acid	FKBP1	P62942	Not Available	unknown	Drugbank
palmitic acid	CNA2	P63098	Not Available	unknown	Drugbank
palmitic acid	HBB	P68871	Not Available	unknown	Drugbank
palmitic acid	HBA1	P69905	Not Available	unknown	Drugbank
palmitic acid	HNL	P80188	Not Available	unknown	Drugbank
palmitic acid	ABAT	P80404	Not Available	unknown	Drugbank
palmitic acid	ARF1	P84077	Not Available	unknown	Drugbank
palmitic acid	SCN6A	Q01118	Not Available	unknown	Drugbank
palmitic acid	FABP5	Q01469	Not Available	unknown	Drugbank
palmitic acid	OGDH	Q02218	Not Available	unknown	Drugbank
palmitic acid	AO	Q06278	Not Available	unknown	Drugbank
palmitic acid	SCN1B	Q07699	Not Available	unknown	Drugbank
palmitic acid	CALNA	Q08209	Not Available	unknown	Drugbank
palmitic acid	SCN5A	Q14524	Not Available	unknown	Drugbank
palmitic acid	HNF4G	Q14541	Not Available	unknown	Drugbank
[truncated: 14,399 more rows]

## Sheet: Supplemental Information 3
Targets or Biomarker	Uniprot
KiSS-1 receptor	Q969F8
PTHrP	P12272
BONE SIALOPROTEIN (BSP)	P21815
IGF-I receptor	P08069
mRNA of Hsp27	P04792
AKT	P31749
Cathepsin D	P07339
Met proto-oncogene tyrosine kinase	P08581
CDK2	P24941
DR5	P20039
C-reactive protein (CRP)	P02741
CDK1	P06493
IL-1Ra	P14778
ErbB3	P21860
Erbb2	P04626
Receptor tyrosine-protein kinase erbB-4	Q15303
Proto-oncogene tyrosine-protein kinase SRC	P12931
PI3K	P48736
focal adhesion kinase (FAK)	Q05397
Protein kinase C	P05129
VEGF	P15692
mRNA of Clusterin	P10909
MMP1	P03956
p53	P04637
Proto-oncogene tyrosine-protein kinase ABL1	P00519
CD44+/CD24-	P16070
Progesterone receptor	P06401
Estrogen receptor	P03372
Cytochrome P450 11A1	P05108
Cytochrome P450 19	P11511
CYP24	Q07973
Heat shock protein HSP 90	P07900
ATP-binding cassette sub-family G member 2	Q9UNQ0
Carbonic Anhydrase XII (CA XII)	O43570
Vimentin	P08670
Epidermal growth factor receptor	P00533
BRCA1	P38398
BRCA2	P51587
Mucin-1	P15941
CA125	Q8WXI7
B-Raf proto-oncogene serine/threonine-protein kinase	P15056
interleukin-6	P05231
CDK9	P50750
C-kit	P10721
Platelet-derived growth factor receptor	P16234
Serine/threonine-protein kinase mTOR	P42345
Poly [ADP-ribose] polymerase 1	P09874
Stat5b	P51692
Bcl2	P10415
E2 (CCNE2)	O96020
Cyclin E1 (CCNE1)	P24864
TOP2A	P11388
CDK4	P11802
CDK6	Q00534
Aurora kinase A	O14965
Neural cadherin	P19022
Vascular endothelial growth factor receptor	P17948
VEGFR2	P35968
Prolactin receptor	P16471
RhoC	P08134
